# Supplementary material for: Life-event stress induced by the Great East Japan Earthquake was associated with relapse in ulcerative colitis but not Crohn's disease: a retrospective cohort study
Source: PubMed Central journal article supplement — BMJ Open. 2013 Feb 8;3(2):e002294. doi: 10.1136/bmjopen-2012-002294 (PMC3586105; doi:10.1136/bmjopen-2012-002294), 2013-02-08
Supplement: bmjopen-2012-002294.draft_revisions.pdf [file bmjopen-2012-002294.draft_revisions.pdf]

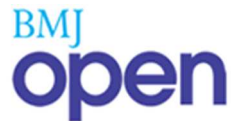

**Life-event stress induced by the Great East Japan Earthquake caused relapse in ulcerative colitis but not in Crohn's disease: a retrospective cohort study**

|                                 |                                                                                                                                                                                                                                                                                                                                                                                                                                                                                                                                                                                                                                                                                                                                                                                                                                                                                                                                                                                                                                                                                                                                                                                                                                                                                                                                                                                                                                                                                                                    |
|---------------------------------|--------------------------------------------------------------------------------------------------------------------------------------------------------------------------------------------------------------------------------------------------------------------------------------------------------------------------------------------------------------------------------------------------------------------------------------------------------------------------------------------------------------------------------------------------------------------------------------------------------------------------------------------------------------------------------------------------------------------------------------------------------------------------------------------------------------------------------------------------------------------------------------------------------------------------------------------------------------------------------------------------------------------------------------------------------------------------------------------------------------------------------------------------------------------------------------------------------------------------------------------------------------------------------------------------------------------------------------------------------------------------------------------------------------------------------------------------------------------------------------------------------------------|
| Journal:                        | <i>BMJ Open</i>                                                                                                                                                                                                                                                                                                                                                                                                                                                                                                                                                                                                                                                                                                                                                                                                                                                                                                                                                                                                                                                                                                                                                                                                                                                                                                                                                                                                                                                                                                    |
| Manuscript ID:                  | bmjopen-2012-002294                                                                                                                                                                                                                                                                                                                                                                                                                                                                                                                                                                                                                                                                                                                                                                                                                                                                                                                                                                                                                                                                                                                                                                                                                                                                                                                                                                                                                                                                                                |
| Article Type:                   | Research                                                                                                                                                                                                                                                                                                                                                                                                                                                                                                                                                                                                                                                                                                                                                                                                                                                                                                                                                                                                                                                                                                                                                                                                                                                                                                                                                                                                                                                                                                           |
| Date Submitted by the Author:   | 01-Nov-2012                                                                                                                                                                                                                                                                                                                                                                                                                                                                                                                                                                                                                                                                                                                                                                                                                                                                                                                                                                                                                                                                                                                                                                                                                                                                                                                                                                                                                                                                                                        |
| Complete List of Authors:       | Shiga, Hisashi; Tohoku University Graduate School of Medicine, Division of Gastroenterology<br>Miyazawa, Teruko; Tohoku University Graduate School of Medicine, Division of Gastroenterology<br>Kinouchi, Yoshitaka; Tohoku University Graduate School of Medicine, Division of Gastroenterology<br>Takahashi, Seiichi; Tohoku University Graduate School of Medicine, Division of Gastroenterology<br>Tominaga, Gen; Japanese Red Cross Ishinomaki Hospital,<br>Takahashi, Hiroki; Sendai Medical Center,<br>Takagi, Sho; Takagi Clinic,<br>Obana, Nobuya; Osaki Citizen Hospital,<br>Kikuchi, Tatsuya; Sendai City Hospital,<br>Oomori, Shinya; Japanese Red Cross Sendai Hospital,<br>Nomura, Eiki; Miyagi Cancer Center,<br>Shiraki, Manabu; Iwate Prefectural Isawa Hospital,<br>Sato, Yuichirou; Osaki Citizen Hospital,<br>Takahashi, Shuichiro; Iwate Prefectural Chubu Hospital,<br>Umemura, Ken; South Miyagi Medical Center,<br>Yokoyama, Hiroshi; Iwate Prefectural Iwai Hospital,<br>Endo, Katsuya; Tohoku University Graduate School of Medicine, Division of Gastroenterology<br>Kakuta, Yoichi; Tohoku University Graduate School of Medicine, Division of Gastroenterology<br>Aizawa, Hiroki; Kesenuma City Hospital,<br>Matsuura, Masaki; Japanese Red Cross Ishinomaki Hospital,<br>Kimura, Tomoya; Iwate Prefectural Isawa Hospital,<br>Kuroha, Masatake; Iwate Prefectural Isawa Hospital,<br>Shimosegawa, Tooru; Tohoku University Graduate School of Medicine, Division of Gastroenterology |
| <b>Primary Subject Heading</b>: | Gastroenterology and hepatology                                                                                                                                                                                                                                                                                                                                                                                                                                                                                                                                                                                                                                                                                                                                                                                                                                                                                                                                                                                                                                                                                                                                                                                                                                                                                                                                                                                                                                                                                    |
| Secondary Subject Heading:      | Medical management, Mental health, Occupational and environmental medicine, Public health, Smoking and tobacco                                                                                                                                                                                                                                                                                                                                                                                                                                                                                                                                                                                                                                                                                                                                                                                                                                                                                                                                                                                                                                                                                                                                                                                                                                                                                                                                                                                                     |
| Keywords:                       | earthquake, ulcerative colitis, Crohn's disease, Inflammatory bowel disease < GASTROENTEROLOGY, relapse                                                                                                                                                                                                                                                                                                                                                                                                                                                                                                                                                                                                                                                                                                                                                                                                                                                                                                                                                                                                                                                                                                                                                                                                                                                                                                                                                                                                            |

1  
2  
3  
4  
5  
6  
7  
8  
9  
10  
11  
12  
13  
14  
15  
16  
17  
18  
19  
20  
21  
22  
23  
24  
25  
26  
27  
28  
29  
30  
31  
32  
33  
34  
35  
36  
37  
38  
39  
40  
41  
42  
43  
44  
45  
46  
47  
48  
49  
50  
51  
52  
53  
54  
55  
56  
57  
58  
59  
60

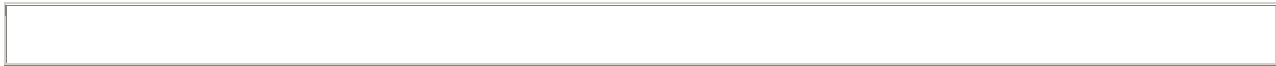

SCHOLARONE™  
Manuscripts

For peer review only

1  
2  
3  
4  
5  
6 **Original research article: Life-event stress induced by the Great East Japan**

7  
8  
9 **Earthquake caused relapse in ulcerative colitis but not in Crohn's disease: a**  
10  
11 **retrospective cohort study**

12  
13  
14 **Short title: Relapse of Ulcerative colitis by the Great East Japan Earthquake**

15  
16  
17  
18  
19  
20  
21 Hisashi Shiga, MD, PhD <sup>1</sup>, Teruko Miyazawa, MD <sup>1</sup>, Yoshitaka Kinouchi, MD, PhD <sup>1</sup>, Seiichi  
22  
23 Takahashi, MD, PhD <sup>1</sup>, Gen Tominaga, MD, PhD <sup>2</sup>, Hiroki Takahashi, MD, PhD <sup>3</sup>, Sho Takagi,  
24  
25 MD, PhD <sup>4</sup>, Nobuya Obana, MD, PhD <sup>5</sup>, Tatsuya Kikuchi, MD, PhD <sup>6</sup>, Shinya Oomori, MD,  
26  
27 PhD <sup>7</sup>, Eiki Nomura, MD, PhD <sup>8</sup>, Manabu Shiraki, MD, PhD <sup>9</sup>, Yuichirou Sato, MD, PhD <sup>5</sup>,  
28  
29 Shuichiro Takahashi, MD, PhD <sup>10</sup>, Ken Umemura, MD <sup>11</sup>, Hiroshi Yokoyama, MD, PhD <sup>12</sup>,  
30  
31 Katsuya Endo, MD, PhD <sup>1</sup>, Yoichi Kakuta, MD, PhD <sup>1</sup>, Hiroki Aizawa, MD, PhD <sup>13</sup>, Masaki  
32  
33 Matsuura, MD, PhD <sup>2</sup>, Tomoya Kimura, MD, PhD <sup>9</sup>, Masatake Kuroha, MD, PhD <sup>9</sup>, Tooru  
34  
35 Shimosegawa, MD, PhD, Professor <sup>1</sup>

36  
37  
38  
39  
40  
41  
42  
43  
44 <sup>1</sup> Division of Gastroenterology, Tohoku University Graduate School of Medicine, Sendai,  
45  
46 JAPAN, <sup>2</sup> Japanese Red Cross Ishinomaki Hospital, Ishinomaki, JAPAN, <sup>3</sup> Sendai Medical  
47  
48 Center, Sendai, JAPAN, <sup>4</sup> Takagi Clinic, Sendai, JAPAN, <sup>5</sup> Osaki Citizen Hospital, Osaki,  
49  
50 JAPAN, <sup>6</sup> Sendai City Hospital, Sendai, JAPAN, <sup>7</sup> Japanese Red Cross Sendai Hospital, Sendai,  
51  
52 JAPAN, <sup>8</sup> Miyagi Cancer Center, Natori, JAPAN, <sup>9</sup> Iwate Prefectural Isawa Hospital, Oshu,  
53  
54  
55  
56  
57  
58  
59  
60

1  
2  
3  
4  
5  
6 JAPAN, <sup>10</sup> Iwate Prefectural Chubu Hospital, Kitakami, JAPAN, <sup>11</sup> South Miyagi Medical  
7  
8  
9 Center, Ogawara, JAPAN, <sup>12</sup> Iwate Prefectural Iwai Hospital, Ichinoseki, JAPAN, <sup>13</sup>  
10  
11  
12 Kesenuma City Hospital, Kesenuma, JAPAN

13  
14  
15 Hisashi Shiga and Teruko Miyazawa contributed equally to this work.  
16  
17

18  
19  
20 Word count: 2,596 words (Abstract 292 words, Total 2,888 words)  
21  
22

23  
24 Source of support: This study is not supported by grants from governmental agencies, private  
25  
26 sources, or manufacturers of drugs or equipment.  
27  
28

29  
30  
31  
32 Corresponding author  
33

34  
35 Hisashi Shiga  
36

37  
38 Division of Gastroenterology, Tohoku University Graduate School of Medicine,  
39

40  
41 1-1 Seiryō, Aoba, Sendai, 980-8574, Japan  
42

43  
44 Tel: +81 227177171, Fax: +81 227177177  
45

46  
47 *E-mail address:* [shiga@med.tohoku.ac.jp](mailto:shiga@med.tohoku.ac.jp)  
48  
49  
50  
51  
52  
53  
54  
55  
56  
57  
58  
59  
60

**Abstract**

Objective: Stress is thought to be one of the triggers of flares in patients with inflammatory bowel disease (IBD). We examined the rate of relapse in IBD patients before and after the Great East Japan Earthquake.

Design: A retrospective cohort study.

Settings: 13 hospitals in Japan.

Participants: 546 ulcerative colitis (UC) and 357 Crohn's disease (CD) patients who received outpatient and inpatient care at 13 hospitals located in the area which suffered serious damage from the Earthquake. Data on patient's clinical characteristics, disease activity and deleterious effects of the Earthquake were obtained from questionnaires and hospital records.

Primary outcome: We evaluated the relapse rate (from inactive to active) across two consecutive months before and two consecutive months after the Earthquake, respectively. In this study, we defined "active" as conditions with a partial Mayo score = 2 or more (UC) or a Harvey-Bradshaw index = 6 or more (CD).

Results: Among the UC patients, disease was active in 167 patients and inactive in 379 patients before the Earthquake. After the Earthquake, activity scores significantly increased ( $P < 0.0001$ ).

A total of 86 patients relapsed (relapse rate = 15.8 %). The relapse rate was about twice that of the corresponding period in the previous year. Among the CD patients, 86 patients had active

1  
2  
3  
4  
5  
6 disease and 271 had inactive disease before the Earthquake. After the Earthquake, activity  
7  
8  
9 indices changed little. A total of 25 patients experienced relapse (relapse rate = 7.0 %). The  
10  
11  
12 relapse rate did not differ from that of the corresponding period in the previous year.  
13  
14  
15 Multivariate analyses revealed that UC, changes in dietary oral intake and anxiety about the  
16  
17  
18 family finances were associated with the relapse.  
19

20  
21 Conclusion: Life-event stress induced by the Great East Japan Earthquake caused relapse in UC  
22  
23  
24 but not in CD.

25  
26 (294 words)  
27  
28  
29  
30  
31

### 32 **Keywords**

33  
34  
35 earthquake, ulcerative colitis, Crohn's disease, relapse  
36  
37  
38  
39  
40  
41  
42  
43  
44  
45  
46  
47  
48  
49  
50  
51  
52  
53  
54  
55  
56  
57  
58  
59  
60

## Article summary

### Article focus

Stress is thought to be one of the triggers of flares in patients with inflammatory bowel disease (IBD); however, it is not ethical to impose stressful circumstances on IBD patients in order to examine their effects.

Disease onset or aggravation of cardiovascular disease, respiratory disease, peptic ulcer, etc. was reported to increase after the huge earthquake; however, there has been no report about flares of IBD caused by the huge earthquake.

### Key messages

We examined the rate of relapse in IBD patients before and after the huge earthquake, the Great East Japan Earthquake of 11 March 2011 in Japan.

Life-event stress induced by the Earthquake caused relapse in ulcerative colitis (UC) but not in Crohn's disease.

This report indicates that we should take care of stress in the management of patients with IBD, especially with UC.

### Strengths and limitations of this study

This is the first report that investigated activities of a large number of IBD patients before and after the huge earthquake.

1  
2  
3  
4  
5  
6  
7  
8  
9  
10  
11  
12  
13  
14  
15  
16  
17  
18  
19  
20  
21  
22  
23  
24  
25  
26  
27  
28  
29  
30  
31  
32  
33  
34  
35  
36  
37  
38  
39  
40  
41  
42  
43  
44  
45  
46  
47  
48  
49  
50  
51  
52  
53  
54  
55  
56  
57  
58  
59  
60

We did not use validated scores that would objectively assess psychological stress, because it is impossible to investigate stress several times before and after an unexpected earthquake.

Our study cannot disregard recall bias.

For peer review only



## Introduction

Inflammatory bowel disease (IBD) is a chronic remitting/relapsing disease. No variable has been defined to be a trigger of flares in patients with IBD. Stress has been indicated as one possible trigger of flares.<sup>1 2 3 4 5 6 7 8</sup> On the other hand, some reports did not prove a relationship between psychological stress and flares of IBD.<sup>9 10 11</sup> A prospective or well-established case-controlled study should be undertaken to determine whether stress is actually related to flares of IBD; however, it is morally difficult to impose stressful circumstances on IBD patients in order to examine their effects.

On 11 March 2011, Japan was hit by one of the most powerful earthquakes in recorded history, the Great East Japan Earthquake. The disaster left more than 28,000 people dead or missing, caused great damage or hardship in dairy life, and also caused profound stress for all of the people, even those who did not suffer individual losses. It was surely one of the most stressful life events and might contribute to relapse in IBD patients. In terms of earthquake-induced disease onset or aggravation, cardiovascular disease, respiratory disease, diabetes mellitus, hypertension and peptic ulcer were reported to increase after the huge earthquake.<sup>12 13 14 15 16 17</sup> However, there has been no report about flares of IBD caused by the huge earthquake.

In this study, we examined activities of IBD patients before and after the Great East Japan

1  
2  
3  
4  
5  
6  
7  
8  
9  
10  
11  
12  
13  
14  
15  
16  
17  
18  
19  
20  
21  
22  
23  
24  
25  
26  
27  
28  
29  
30  
31  
32  
33  
34  
35  
36  
37  
38  
39  
40  
41  
42  
43  
44  
45  
46  
47  
48  
49  
50  
51  
52  
53  
54  
55  
56  
57  
58  
59  
60

Earthquake, to evaluate the relapse rate and the remission rate induced by the Earthquake. We also aimed to identify factors that were related to relapse or remission of IBD.

For peer review only

## Materials and methods

### Study subjects

Thirteen hospitals (Tohoku University Hospital, Japanese Red Cross Ishinomaki Hospital, Sendai Medical Center, Takagi Clinic, Osaki Citizen Hospital, Sendai City Hospital, Japanese Red Cross Sendai Hospital, Miyagi Cancer Center, South Miyagi Medical Center and Kesenuma City Hospital in Miyagi Prefecture; Iwate Prefectural Isawa Hospital, Iwate Prefectural Chubu Hospital, Iwate Prefectural Iwai Hospital in Iwate Prefecture) participated in this study. These hospitals are located in the area that suffered serious damage from the Great East Japan Earthquake. We sent questionnaires to ulcerative colitis (UC) and Crohn's disease (CD) patients who received care in these hospitals. Then we examined the hospital records for data on the patients who returned a questionnaire. Hospital data contained information such as gender, age, IBD duration, disease extent (total colitis, left-sided colitis and proctitis in UC), disease location (small intestine, colon and both in CD), extra-intestinal complications, use of medications, smoking status, and pregnancy experience. To evaluate the degree of stress objectively, we also obtained data about each patient's situation regarding the Earthquake, such as damage to the patient's house, duration of temporarily homelessness, deaths of family member or friends, changes in daily dietary intake, discontinuation or delay in taking medications, loss of job, family finances and changes in smoking status. We divided housing

1  
2  
3  
4  
5  
6 damage into 4 groups according to the degree of damage to the house; total loss ( $\geq 50\%$ ),  
7  
8  
9 half-loss ( $\geq 20\%$  but  $< 50\%$ ), partial loss ( $\geq 3\%$  but  $< 20\%$ ) and no damage. Written informed  
10  
11  
12 consent was obtained from all participants under the protocol approved by the Tohoku  
13  
14  
15 University Hospital Committee for Clinical Investigation.

16  
17  
18 We evaluated disease activity for two consecutive months before and two consecutive  
19  
20 months after the Great East Japan Earthquake using Mayo score for UC<sup>18</sup> or Harvey-Bradshaw  
21  
22 index for CD<sup>19</sup> that had been noted in hospital records and questionnaires. The Mayo score is  
23  
24 comprised of information on stool frequency, rectal bleeding, findings on endoscopy and a  
25  
26 physician's global assessment. Scores can range from 0 to 12. However, we used a partial Mayo  
27  
28 score (range from 0 to 9) that excluded findings on endoscopy because routine endoscopic  
29  
30 examinations were not performed so soon after the Earthquake. The Harvey-Bradshaw index is  
31  
32 comprised of information on general condition, abdominal pain, diarrhea frequency, abdominal  
33  
34 mass and complications. Higher scores for both the Mayo score and the Harvey-Bradshaw index  
35  
36 indicate more severe disease activity. IBD patients having a stoma were excluded because of  
37  
38 difficulties in the count of bowel movements.

39  
40  
41 In this study, "active" was defined as follows; a partial Mayo score = 2 or more (UC) and a  
42  
43 Harvey-Bradshaw index = 6 or more (CD). Lower scores indicated inactive disease. We defined  
44  
45 "relapse" as a change from inactive to active and "remission" as a change from active to  
46  
47  
48  
49  
50  
51  
52  
53  
54  
55  
56  
57  
58  
59  
60

1  
2  
3  
4  
5  
6 inactive across the 2-months before and 2-months after the Earthquake. The patients who  
7  
8  
9 remained active or inactive during the study period were considered to have “stable disease”.  
10  
11  
12 We compared the relapse and remission rates with those during the corresponding period in the  
13  
14  
15 previous year as controls.  
16  
17  
18  
19  
20

### 21 **Statistical analysis**

22  
23 Quantitative data are presented as mean  $\pm$  standard deviation (SD). Discrete variables are  
24  
25  
26 presented as median and range. All statistical analyses were performed using the JMP version 9  
27  
28  
29 (SAS Institute Inc., Cary, NC, USA). Differences between two groups were evaluated using  
30  
31  
32 chi-square test or Fisher’s exact probability test, unpaired t-test or Wilcoxon signed-rank test, as  
33  
34  
35 appropriate. A multiple logistic regression method that included all possible variables was used.  
36  
37  
38 The level of statistical significance was set at  $P < 0.05$ .  
39  
40  
41  
42  
43  
44  
45  
46  
47  
48  
49  
50  
51  
52  
53  
54  
55  
56  
57  
58  
59  
60

## Results

### Patients' clinical characteristics

A total of 903 completed questionnaires (from 546 UC and 357 CD) were returned to us. We examined the hospital records for each patient. Of the UC patients, 269 (49.3%) were males and 277 (50.7%) were females. The mean age of the entire group was of  $45.3 \pm 16.6$  years and mean disease duration was  $9.7 \pm 9.0$  years. Extent of disease was as follows; 208 patients (38.1%), total colitis (over splenic flexure); 183 (33.5%), left-sided colitis (up to splenic flexure); and 83 (15.2%), proctitis (up to rectum). Extent was unknown in 72 patients (13.2%). Among the CD patients, there were 253 males (70.9%) and 104 females (29.1%). Mean age was  $37.1 \pm 12.5$  years and mean disease duration was  $11.6 \pm 8.1$  years. Location of disease was as follows; 61 patients (17.1%), small intestine; 47 (13.2%), colon; and 212 (59.4%), both small intestine and colon. Location was unknown in 37 patients (10.3%) (Table 1).

Fifty-one UC (9.3%) and 43 CD (12.0%) patients experienced extra-intestinal complications. Of the UC patients, 55 patients (10.1%) were current smokers and 162 (29.7%) were past smokers. On the other hand, 85 CD patients (23.8%) were current smokers, and 74 (20.7%) were past smokers. Of 277 females with UC, 181 (65.3%) had experienced pregnancy while only 41 of 104 CD females (39.4%) had experienced pregnancy. Five UC patients and 3 CD patients were just pregnant when the Earthquake occurred (Table 1). Medications used by the

1  
2  
3  
4  
5  
6 IBD patients before the Earthquake are shown in Table 2.  
7  
8  
9

### 10 11 **Deleterious effects of the Earthquake** 12

13  
14 Of the 903 IBD patients, the houses of 501 patients (55.5%) were damaged; partial loss was  
15 experienced by 369 patients (40.9%), half-loss by 58 (6.4%), and total loss by 74 (8.2%). As a  
16 result, 62 (6.9%) patients had to stay in refuge facilities for one week or more. A total of 175  
17 patients (19.4%) experienced the death of a family member or a friend (Table 3).  
18  
19  
20  
21  
22  
23  
24

25  
26 Only 51 patients (5.7%) experienced complete loss of their jobs after the Earthquake.  
27  
28 However, 279 (30.9%) and 157 (17.4%) patients felt short-term (for the next several months)  
29 and long-term (for the next several years) anxiety about their family finances, respectively  
30 (Table 3).  
31  
32  
33  
34  
35  
36  
37

38 Because of temporarily homelessness and difficulty in getting the usual foods consumed,  
39 changes in daily intake such as fat, vegetables, fruits, etc. were experienced by 269 patients  
40 (29.8%) after the Earthquake. With regard to medications, 69 patients (11.7%) interrupted  
41 medications for a week or more because they had lost their medicines or could not consult with  
42 doctors (see Table 3).  
43  
44  
45  
46  
47  
48  
49  
50  
51  
52  
53  
54

### 55 **Changes in disease activity before and after the Earthquake** 56 57

1  
2  
3  
4  
5  
6 Of the UC patients, disease was active in 167 patients (30.6%) and inactive in 379 patients  
7  
8  
9 (69.4%) before the Earthquake. After the Earthquake, activity scores significantly increased ( $P$   
10  
11  
12  $< 0.0001$ ). A total of 86 patients relapsed and disease status became inactive in 22 patients;  
13  
14 therefore the relapse rate (from inactive to active) was 15.8% (86/546) and the remission rate  
15  
16 (from active to inactive) was 4.0% (22/546). The relapse rate was significantly higher than in  
17  
18 the previous year (8.8%, data not shown). On the other hand, the remission rate was  
19  
20 significantly lower than in the previous year (8.8%, data not shown).  
21  
22  
23  
24

25  
26 Of the CD patients, 86 patients (24.1%) had active disease and 271 patients (75.9%) had  
27  
28  
29 inactive disease before the Earthquake. After the Earthquake, activity indices were little  
30  
31  
32 changed. A total of 25 patients relapsed and disease status became inactive in 16 patients;  
33  
34 therefore the relapse rate (from inactive to active) was 7.0% (25/357) and the remission rate  
35  
36 (from active to inactive) was 4.5% (16/357). Unlike in UC, the relapse rate among CD patients  
37  
38 was slightly higher than in the previous year (5.3%, data not shown), but not significantly. On  
39  
40  
41 the other hand, the remission rate was twice that of the previous year (2.2%, data not shown),  
42  
43  
44 but did not differ significantly.  
45  
46  
47  
48

49 Because of disease flares, 96 patients (10.6%) needed additional medications after the  
50  
51  
52 Earthquake as follows: prednisolone (27 patients), tacrolimus (3), azathioprine (11), infliximab  
53  
54  
55 (13), adalimumab (6), total parenteral nutrition (4), or others.  
56  
57  
58  
59  
60



### Possible variables for relapse or remission

There were no differences in patients' clinical characteristics between the relapse group and non-relapse group. With regard to remission, there were also no differences in patients' clinical characteristics between the remission group and non-remission group.

Multivariate analyses revealed that UC, changes in oral intake and anxiety about the family finances were independent predictors of relapse with an adjusted odds ratio (OR) of 2.86 (95% confidence interval (CI), 1.73 to 4.87), 1.83 (1.16 to 2.88) and 1.69 (1.05 to 2.70), respectively (Table 4). On the other hand, no factor was identified as an independent predictor of remission (Table 5).

## Discussion

Of the 903 IBD patients, 132 patients (14.6%) had experienced damage to their houses of half or more and 175 patients (19.4%) experienced the deaths of a family member or friends. These factors confirm that the Great East Japan Earthquake had considerable power and was certainly one of the most stressful life events that could be experienced. The present study showed that life-event stress induced by the Great East Japan Earthquake caused relapse in UC but not in CD. This is the first report that investigated activities of a large number of IBD patients before and after the huge earthquake.

As for patient's clinical characteristics, gender, age, IBD duration, extra-intestinal complications and smoking status did not influence flares of IBD, with the exception of IBD type (UC or CD). As mentioned above, there have been many reports that psychological stress may induce flares of UC.<sup>1234568</sup> On the other hand, there have been few reports about flares of CD.<sup>478</sup> Our present study demonstrated that psychological stress caused relapse in UC, but not in CD. Other clinical characteristics, including smoking status, did not induce flares. In terms of damage and other deleterious effects from the Earthquake, damage to houses, duration of temporarily homelessness, death of family members or friends and unemployment did not induce flares of IBD; however, anxiety about family finances was related to relapse. These results may indicate that psychological stress or the uneasiness over the future have a greater

1  
2  
3  
4  
5  
6 influence on UC flares than direct damage and losses.  
7

8  
9 Although discontinuation of medications had no influence on flares of IBD, changes in daily  
10 dietary intake induced flares. The relation between dietary factors and the onset or flares of IBD  
11 has been reported.<sup>20 21 22</sup> After the Earthquake, we could not obtain enough food; therefore we  
12 consumed more processed foods and less raw vegetables and fruits. With regard to possible  
13 variables for remission, we expected that the decrease in total volume or fatty foods would  
14 induce remission, especially in CD patients. However, our results did not consistent with this  
15 hypothesis. It may be due to the facts that the period of dietary restriction was not so long, and  
16 food rationing began soon. There were just few patients that had changes in smoking status after  
17 the Earthquake; therefore we could not include this factor in multivariate analyses. However,  
18 changes in smoking status may be an important factor in flares of patients with UC, but not with  
19 CD. Of the 9 UC patients who stopped smoking after the Earthquake, 7 experienced relapse ( $P$   
20 = 0.002). Beaugerie et al. had reported that among smokers with UC who stopped smoking,  
21 disease severity increased after cessation.<sup>23</sup> Over the short term, smoking itself did not have an  
22 influence on relapse or remission; however, changes in smoking status caused flares in UC.  
23  
24  
25  
26  
27  
28  
29  
30  
31  
32  
33  
34  
35  
36  
37  
38  
39  
40  
41  
42  
43  
44  
45  
46  
47  
48

49 Our study had some limitations. First, we did not use validated scores that would objectively  
50 assess psychological stress such as the Cohen Perceived Stress Scale.<sup>24</sup> Since a huge earthquake  
51 happens suddenly, it is impossible to investigate stress several times before and after an  
52  
53  
54  
55  
56  
57  
58  
59  
60

1  
2  
3  
4  
5  
6 earthquake. Therefore we assessed the degree of stress by investigating information about  
7  
8  
9 damage situations and changes in life styles after the Great East Japan Earthquake. Second, our  
10  
11  
12 study cannot disregard recall bias. It was difficult to administer a questionnaire immediately  
13  
14  
15 after the Earthquake. That was why we obtained data about clinical characteristics and activities  
16  
17  
18 from both questionnaires and medical records. Third, non-steroidal anti-inflammatory drugs  
19  
20  
21 (NSAIDs) and antibiotics may contribute to the relapse of IBD.<sup>25</sup> However, we think the  
22  
23  
24 numbers of newly prescribed NSAIDs and antibiotics during the study period were less than or  
25  
26  
27 equal to those of the corresponding period in the previous year. Because of the difficulty in  
28  
29  
30 obtaining medicines after the Earthquake, the number of newly prescribed NSAIDs and  
31  
32  
33 antibiotics might have decreased. In addition, unlike in UC patients, twice as many males as  
34  
35  
36 females were among CD patients, which is in agreement with a previous report in Japan.<sup>26</sup>  
37  
38  
39 There were more current smokers among CD patients than among those with UC, in agreement  
40  
41  
42 with previous reports.<sup>8,20</sup>

43  
44 Life-event stress induced by the Great East Japan Earthquake caused relapse in UC but not in  
45  
46  
47 CD. We hope that this report will help in the usual management of patients with IBD, not only  
48  
49  
50 at times of catastrophic events such as a huge earthquake. For the future, a prospective study  
51  
52  
53 should be undertaken to determine whether stress is actually related to flares of IBD.  
54  
55  
56  
57  
58  
59  
60

### Contributorship statement

Hisashi Shiga and Teruko Miyazawa had the original idea for this study and were involved in writing the original study protocol, data collection and writing manuscript.

Gen Tominaga, Hiroki Takahashi, Sho Takagi, Nobuya Obana, Tatsuya Kikuchi, Shinya Oomori, Eiki Nomura, Manabu Shiraki, Yuichirou Sato, Shuichiro Takahashi, Ken Umemura, Hiroshi Yokoyama, Katsuya Endo, Yoichi Kakuta, Hiroki Aizawa, Masaki Matsuura, Tomoya

Kimura and Masatake Kuroha were involved in data collection and contributed to discussion.

Yoshitaka Kinouchi, Seiichi Takahashi and Tooru Shimosegawa contributed to discussion and reviewed manuscript.

All authors had full access to all of the data in this study and can take responsibility for the integrity of the data and the accuracy of the data analysis.

### Funding

This study is not supported by grants from governmental agencies, private sources, or manufacturers of drugs or equipment. This study was performed within the health insurance treatment.

### Declaration of interest

All authors have completed the Unified Competing Interest form at [www.icmje.org/coi\\_disclosure.pdf](http://www.icmje.org/coi_disclosure.pdf) (available on request from the corresponding author) and

1  
2  
3  
4  
5  
6 declare that (1) no support from any organisations for the submitted work; (2) no financial  
7  
8  
9 relationships with any organisations that might have an interest in the submitted work in the  
10  
11  
12 previous 3 years; (3) no other relationships or activities that could appear to have influenced the  
13  
14  
15 submitted work.

### 16 17 18 **Ethical approval**

19  
20 This study was approved by the Tohoku University Hospital Committee for Clinical  
21  
22  
23 Investigation. Data are presented in aggregate and no personal health information is disclosed.  
24  
25

### 26 27 **Data sharing**

28  
29 No additional data available.  
30  
31  
32  
33  
34  
35  
36  
37  
38  
39  
40  
41  
42  
43  
44  
45  
46  
47  
48  
49  
50  
51  
52  
53  
54  
55  
56  
57  
58  
59  
60

## References

1. Mawdsley JE, Rampton DS. Psychological stress in IBD: new insights into pathogenic and therapeutic implications. *Gut* 2005; 54: 1481–91.
2. Levenstein S, Prantera C, Varvo V, et al. Stress and exacerbation in ulcerative colitis: A prospective study of patients enrolled in remission. *Am J Gastroenterol* 2000; 95: 1213–20.
3. Bitton A, Sewitch MJ, Peppercorn MA, et al. Psychosocial determinants of relapse in ulcerative colitis: a longitudinal study. *Am J Gastroenterol* 2003; 98: 2203–8.
4. Mittermaier C, Dejaco C, Waldhoer T, et al. Impact of depressive mood on relapse in patients with inflammatory bowel disease: a prospective 18-month follow-up study. *Psychosom Med* 2004; 66: 79-84.
5. Mawdsley JE, Macey MG, Feakins RM, et al. The effect of acute psychologic stress on systemic and rectal mucosal measures of inflammation in ulcerative colitis. *Gastroenterology* 2006; 131: 410-9.
6. Maunder RG, Greenberg GR, Nolan RP, et al. Autonomic response to standardized stress predicts subsequent disease activity in ulcerative colitis. *Eur J Gastroenterol Hepatol* 2006; 18: 413–420.
7. Bitton A, Dobkin P, Edwardes MD, et al. Predicting relapse in Crohn's disease: a biopsychosocial model. *Gut* 2008; 57: 1386–92.

- 1  
2  
3  
4  
5  
6 8. Bernstein CN, Singh S, Graff LA, et al. A prospective population-based study of triggers of  
7  
8  
9 symptomatic flares in IBD. *Am J Gastroenterol* 2010; 105: 1994–2002.
- 10  
11  
12 9. North CS, Alpers DH, Helzer JE, et al. Do life events or depression exacerbate  
13  
14  
15 inflammatory bowel disease? A prospective study. *Ann Intern Med* 1991; 114: 381–386.
- 16  
17  
18 10. Vidal A, Gomez-Gil E, Sans M, et al. Life events and inflammatory bowel disease relapse:  
19  
20  
21 a prospective study of patients enrolled in remission. *Am J Gastroenterol* 2006; 101:  
22  
23  
24 775–781.
- 25  
26  
27 11. Mikocka-Walus AA, Turnbull DA, Moulding NT, et al. Does psychological status  
28  
29  
30 influence clinical outcomes in patients with inflammatory bowel disease (IBD) and other  
31  
32  
33 chronic gastroenterological diseases: an observational cohort prospective study.  
34  
35  
36 *Biopsychosoc Med* 2008; 2: 11-19.
- 37  
38  
39 12. Takakura R, Himeno S, Kanayama Y, et al. Follow-up after the Hanshin-Awaji earthquake:  
40  
41  
42 diverse influences on pneumonia, bronchial asthma, peptic ulcer and diabetes mellitus.  
43  
44  
45 *Intern Med* 1997; 36: 87-91.
- 46  
47  
48 13. Matsuoka T, Yoshioka T, Oda J, et al. The impact of a catastrophic earthquake on  
49  
50  
51 morbidity rates for various illnesses. *Public Health* 2000; 114: 249-53.
- 52  
53  
54 14. Aoyama N, Kinoshita Y, Fujimoto S, et al. Peptic ulcers after the Hanshin-Awaji  
55  
56  
57 earthquake: increased incidence of bleeding gastric ulcers. *Am J Gastroenterol* 1998; 93:  
58  
59  
60



- 1  
2  
3  
4  
5  
6 311-6.  
7  
8  
9 15. Aoki T, Fukumoto Y, Yasuda S, et al. The Great East Japan Earthquake Disaster and  
10  
11 cardiovascular diseases. *Eur Heart J* 2012 Aug 28 [Epub ahead of print].  
12  
13  
14 16. Ogawa S, Ishiki M, Nako K, et al. Effects of the Great East Japan Earthquake and huge  
15  
16 tsunami on glycaemic control and blood pressure in patients with diabetes mellitus. *BMJ*  
17  
18 *Open* 2012; 2: e000830.  
19  
20  
21  
22 17. Aoyagi T, Yamada M, Kunishima H, et al. Characteristics of infectious diseases in  
23  
24 hospitalized patients during the early phase after the 2011 Great East Japan earthquake:  
25  
26 pneumonia as a significant reason for hospital care. *Chest* 2012 Aug 13 [Epub ahead of  
27  
28 print].  
29  
30  
31  
32  
33 18. Schroeder KW, Tremaine WJ, Ilstrup DM. Coated oral 5-aminosalicylic acid therapy for  
34  
35 mildly to moderately active ulcerative colitis. A randomized study. *N Engl J Med* 1987;  
36  
37 317: 1625-9.  
38  
39  
40  
41  
42 19. Harvey RF, Bradshaw JM. A simple index of Crohn's-disease activity. *Lancet* 1980; 1:  
43  
44 514.  
45  
46  
47  
48 20. Thornton JR, Emmett PM, Heaton KW. Smoking, sugar, and inflammatory bowel disease.  
49  
50 *Br Med J*. 1985; 290: 1786-7.  
51  
52  
53  
54 21. Jowett SL, Seal CJ, Pearce MS, et al. Influence of dietary factors on the clinical course of  
55  
56  
57  
58  
59  
60

- 1  
2  
3  
4  
5  
6 ulcerative colitis: a prospective cohort study. *Gut* 2004; 53: 1479-84.  
7  
8  
9 22. Jantchou P, Morois S, Clavel-Chapelon F, et al. Animal protein intake and risk of  
10  
11 inflammatory bowel disease: The E3N prospective study. *Am J Gastroenterol* 2010; 105:  
12  
13 2195-201.  
14  
15  
16  
17 23. Beaugerie L, Massot N, Carbonnel F, et al. Impact of cessation of smoking on the course of  
18  
19 ulcerative colitis. *Am J Gastroenterol*. 2001; 96: 2113-6.  
20  
21  
22  
23 24. Cohen S, Kamarck T, Mermelstein R. A global measure of perceived stress. *J Health Soc*  
24  
25  
26 *Behav* 1983; 24: 385-96.  
27  
28  
29 25. Singh S, Graff LA, Bernstein CN. Do NSAIDs, antibiotics, infections, or stress trigger  
30  
31 flares in IBD? *Am J Gastroenterol* 2009; 104: 1298-313.  
32  
33  
34  
35 26. Yao T, Matsui T, Hiwatashi N. Crohn's disease in Japan: diagnostic criteria and  
36  
37  
38 epidemiology. *Dis Colon Rectum* 2000; 43: S85-93.  
39  
40  
41  
42  
43  
44  
45  
46  
47  
48  
49  
50  
51  
52  
53  
54  
55  
56  
57  
58  
59  
60

1  
2  
3  
4  
5  
6  
7  
8  
9  
10  
11  
12  
13  
14  
15  
16  
17  
18  
19  
20  
21  
22  
23  
24  
25  
26  
27  
28  
29  
30  
31  
32  
33  
34  
35  
36  
37  
38  
39  
40  
41  
42  
43  
44  
45  
46  
47  
48  
49  
50  
51  
52  
53  
54  
55  
56  
57  
58  
59  
60

## Tables

Table 1. Patients' clinical characteristics.

|                                |      | Ulcerative<br>colitis | Crohn's<br>disease | Total       |
|--------------------------------|------|-----------------------|--------------------|-------------|
| Number of patients             |      | 546                   | 357                | 903         |
| Gender                         |      |                       |                    |             |
| Male                           |      | 269 (49.3%)           | 253 (70.9%)        | 522 (57.8%) |
| Female                         |      | 277 (50.7%)           | 104 (29.1%)        | 381 (42.2%) |
| Age                            | year | 45.3 ± 16.6           | 37.1 ± 12.5        | 42.0 ± 15.6 |
| Disease duration               | year | 9.7 ± 9.0             | 11.6 ± 8.1         | 10.5 ± 8.7  |
| Disease extent                 |      |                       |                    |             |
| Total colitis                  |      | 208 (38.1%)           | -                  |             |
| Left-sided colitis             |      | 183 (33.5%)           | -                  |             |
| Proctitis                      |      | 83 (15.2%)            | -                  |             |
| Unknown                        |      | 72 (13.2%)            | -                  |             |
| Disease location               |      |                       |                    |             |
| Small intestine                |      | -                     | 61 (17.1%)         |             |
| Colon                          |      | -                     | 212 (59.4%)        |             |
| Small intestine and colon      |      | -                     | 47 (13.2%)         |             |
| Unknown                        |      | -                     | 37 (10.3%)         |             |
| Extra-intestinal complications |      |                       |                    |             |
| Positive                       |      | 51 (9.3%)             | 43 (12.0%)         | 94 (10.4%)  |
| None                           |      | 495 (90.7%)           | 314 (88.0%)        | 809 (89.6%) |
| Smoking status                 |      |                       |                    |             |
| Current smokers                |      | 55 (10.1%)            | 85 (23.8%)         | 140 (15.5%) |
| Past smokers                   |      | 162 (29.7%)           | 74 (20.7%)         | 236 (26.1%) |
| None                           |      | 327 (59.9%)           | 198 (55.5%)        | 525 (58.2%) |
| Unclear                        |      | 2 (0.3%)              | 0 (0.0%)           | 2 (0.2%)    |
| Pregnancy experience           |      |                       |                    |             |
| Positive                       |      | 181/277               | 41/104             | 222/381     |
| (During the Earthquake)        |      | (5)                   | (3)                | (8)         |

Table 2. Use of the medications before the Great East Japan Earthquake.

|               | Ulcerative<br>colitis<br>(N=546) | Crohn's<br>disease<br>(N=357) | Total<br>(N=903) |
|---------------|----------------------------------|-------------------------------|------------------|
| 5-ASA or SASP | 486 (89.0%)                      | 276 (77.3%)                   | 762 (84.4%)      |
| PSL           | 79 (9.0%)                        | 26 (7.3%)                     | 105 (11.6%)      |
| (mg)          | (1-60)                           | (1-40)                        |                  |
| AZA or 6-MP   | 56 (10.3%)                       | 55 (15.4%)                    | 111 (12.3%)      |
| (mg)          | (15-100)                         | (10-100)                      |                  |
| Tacrolimus    | 4 (0.7%)                         | -                             | 4 (0.4%)         |
| IFX           | 18 (3.3%)                        | 151 (42.3%)                   | 169 (18.7%)      |
| (mg)          | (200-500)                        | (150-500)                     |                  |
| ADA           | -                                | 11 (3.1%)                     | 11 (1.2%)        |
| TPN           | 0 (0.0%)                         | 3 (0.8%)                      | 3 (0.3%)         |
| ED            |                                  | 70 (19.6%)                    | 70 (7.8%)        |
| (kcal/day)    |                                  | (300-1,800)                   |                  |
| CAP           | 3 (0.5%)                         | 1 (0.3%)                      | 4 (0.4%)         |

5-ASA, aminosalicilic acid; SASP, salazosurufapirizine; PSL, predonisolone; AZA, azathioprine; MP, mercaptopurine; IFX, infliximab; ADA, adalimumab; TPN, total parenteral nutrition; ED, elemental diet; CAP, cytoapheresis.

Table 3. Damage and deleterious effects of the Great East Japan Earthquake.

|                                           | Ulcerative<br>colitis<br>(N=546) | Crohn's<br>disease<br>(N=357) | Total<br>(N=903) |
|-------------------------------------------|----------------------------------|-------------------------------|------------------|
| <b>Damage to houses</b>                   |                                  |                               |                  |
| Total loss ( $\geq 50\%$ )                | 36 (6.6%)                        | 38 (10.6%)                    | 74 (8.2%)        |
| Half-loss ( $\geq 20\%$ but $< 50\%$ )    | 37 (6.8%)                        | 21 (5.9%)                     | 58 (6.4%)        |
| Partial loss ( $\geq 3\%$ but $< 20\%$ )  | 236 (43.2%)                      | 133 (37.3%)                   | 369 (40.9%)      |
| None                                      | 233 (42.7%)                      | 161 (45.1%)                   | 394 (43.6%)      |
| Unclear                                   | 4 (0.7%)                         | 4 (1.1%)                      | 8 (0.9%)         |
| <b>Temporarily homeless</b>               |                                  |                               |                  |
| 1 week or more                            | 37 (6.8%)                        | 25 (7.0%)                     | 62 (6.9%)        |
| Less than 1 week or none                  | 503 (92.1%)                      | 331 (92.7%)                   | 834 (92.3%)      |
| Unclear                                   | 6 (1.1%)                         | 1 (0.3%)                      | 7 (0.8%)         |
| <b>Death of family members or friends</b> |                                  |                               |                  |
| Yes                                       | 106 (19.4%)                      | 69 (19.3%)                    | 175 (19.4%)      |
| None                                      | 435 (79.7%)                      | 284 (79.6%)                   | 719 (79.6%)      |
| Unclear                                   | 5 (0.9%)                         | 4 (1.1%)                      | 9 (1.0%)         |
| <b>Changes in daily dietary intake</b>    |                                  |                               |                  |
| Yes                                       | 153 (28.0%)                      | 116 (32.5%)                   | 269 (29.8%)      |
| No                                        | 387 (70.9%)                      | 239 (66.9%)                   | 626 (69.3%)      |
| Unclear                                   | 6 (1.1%)                         | 2 (0.6%)                      | 8 (0.9%)         |
| <b>Discontinuation of medications</b>     |                                  |                               |                  |
| 1 week or more                            | 39 (9.8%)                        | 30 (14.1%)                    | 69 (11.7%)       |
| None                                      | 507 (9.8%)                       | 327 (14.1%)                   | 834 (11.7%)      |
| Unclear                                   | 358 (90.2%)                      | 256 (85.9%)                   | 614 (88.3%)      |
| <b>Interruption in IFX or ADA</b>         |                                  |                               |                  |
| Yes                                       | 1/18                             | 19/162                        | 20/180           |
| <b>Complete loss of job</b>               |                                  |                               |                  |
| Yes                                       | 26 (4.8%)                        | 25 (7.0%)                     | 51 (5.7%)        |
| None                                      | 518 (94.9%)                      | 330 (92.4%)                   | 848 (93.9%)      |
| Unclear                                   | 2 (0.3%)                         | 2 (5.6%)                      | 4 (0.4%)         |
| <b>Anxiety about family finances</b>      |                                  |                               |                  |
| Yes                                       | 167 (30.6%)                      | 145 (40.6%)                   | 312 (34.6%)      |

|                                |             |             |             |
|--------------------------------|-------------|-------------|-------------|
| (Short-term anxiety)*          | (147)       | (132)       | (279)       |
| (Long-term anxiety)*           | (83)        | (74)        | (157)       |
| None                           | 376 (68.9%) | 211 (59.1%) | 587 (65.0%) |
| Unclear                        | 3 (0.5%)    | 1 (0.3%)    | 4 (0.4%)    |
| Changes in smoking status      |             |             |             |
| Stopped after the Earthquake   | 9           | 5           | 14          |
| Restarted after the Earthquake | 10          | 5           | 15          |

IFX, infliximab; ADA, Adalimumab. \* Short-term anxiety indicates anxiety about their family finances for the next several months. Long-term anxiety indicates anxiety about their family finances several years or more in the future.

Table 4. Possible variables for relapse after the Great East Japan Earthquake.

|                                     |     | Odds ratio | <i>P</i> value | 95% CI |      |
|-------------------------------------|-----|------------|----------------|--------|------|
| IBD type                            |     |            |                |        |      |
| Ulcerative colitis                  | 546 | 2.86       | < 0.0001       | 1.73   | 4.87 |
| Crohn's disease                     | 357 | 1          |                |        |      |
| Gender                              |     |            |                |        |      |
| Male                                | 522 | 0.78       | 0.26           | 0.50   | 1.20 |
| Female                              | 381 | 1          |                |        |      |
| Age*                                |     |            |                |        |      |
| More than 40 years                  | 423 | 0.72       | 0.16           | 0.45   | 1.14 |
| 40 or less                          | 479 | 1          |                |        |      |
| Disease duration                    |     |            |                |        |      |
| More than 10 years                  | 350 | 0.94       | 0.80           | 0.58   | 1.50 |
| 10 or less                          | 553 | 1          |                |        |      |
| Extra-intestinal complications      |     |            |                |        |      |
| Positive                            | 94  | 1.40       | 0.32           | 0.71   | 2.59 |
| None                                | 809 | 1          |                |        |      |
| Smoking status*                     |     |            |                |        |      |
| Current smokers                     | 140 | 0.95       | 0.88           | 0.48   | 1.76 |
| Others                              | 761 | 1          |                |        |      |
| Damage to houses*                   |     |            |                |        |      |
| Total or half loss                  | 132 | 1.01       | 0.97           | 0.52   | 1.88 |
| Others                              | 763 | 1          |                |        |      |
| Temporarily homeless*               |     |            |                |        |      |
| 1 week or more                      | 62  | 0.97       | 0.94           | 0.41   | 2.14 |
| Others                              | 834 | 1          |                |        |      |
| Death of family members or friends* |     |            |                |        |      |
| Yes                                 | 175 | 1.20       | 0.50           | 0.70   | 2.03 |
| None                                | 719 | 1          |                |        |      |
| Complete loss of job*               |     |            |                |        |      |
| Yes                                 | 51  | 1.55       | 0.31           | 0.65   | 3.47 |
| None                                | 848 | 1          |                |        |      |
| Anxiety about family finances*      |     |            |                |        |      |

|                                  |     |      |        |      |      |
|----------------------------------|-----|------|--------|------|------|
| Yes                              | 312 | 1.69 | 0.03   | 1.05 | 2.70 |
| None                             | 587 | 1    |        |      |      |
| Changes in daily dietary intake* |     |      |        |      |      |
| Yes                              | 269 | 1.83 | < 0.01 | 1.16 | 2.88 |
| None                             | 626 | 1    |        |      |      |
| Discontinuation of medications   |     |      |        |      |      |
| 1 week or more                   | 69  | 1.49 | 0.30   | 0.69 | 2.98 |
| None                             | 834 | 1    |        |      |      |

CI, Confidence interval. \* Information on several patients about age, smoking status, damage to houses, temporarily homelessness, death of family members or friends, complete loss of job, anxiety about family finances, and changes in daily dietary intake was not available.



Table 5. Possible variables for remission after the Great East Japan Earthquake.

|                                     |     | Odds ratio | <i>P</i> value | 95% CI |      |
|-------------------------------------|-----|------------|----------------|--------|------|
| IBD type                            |     |            |                |        |      |
| Ulcerative colitis                  | 546 | 0.81       | 0.58           | 0.39   | 1.72 |
| Crohn's disease                     | 357 | 1          |                |        |      |
| Gender                              |     |            |                |        |      |
| Male                                | 522 | 0.84       | 0.62           | 0.41   | 1.72 |
| Female                              | 381 | 1          |                |        |      |
| Age*                                |     |            |                |        |      |
| More than 40 years                  | 423 | 0.89       | 0.76           | 0.41   | 1.88 |
| 40 or less                          | 479 | 1          |                |        |      |
| Disease duration                    |     |            |                |        |      |
| More than 10 years                  | 350 | 0.63       | 0.25           | 0.27   | 1.37 |
| 10 or less                          | 553 | 1          |                |        |      |
| Extra-intestinal complications      |     |            |                |        |      |
| Positive                            | 94  | 0.80       | 0.71           | 0.19   | 2.33 |
| None                                | 809 | 1          |                |        |      |
| Smoking status*                     |     |            |                |        |      |
| Current smokers                     | 140 | 0.70       | 0.52           | 0.20   | 1.90 |
| Others                              | 761 | 1          |                |        |      |
| Damage to houses*                   |     |            |                |        |      |
| Total or half loss                  | 132 | 1.07       | 0.90           | 0.33   | 2.86 |
| Others                              | 763 | 1          |                |        |      |
| Temporarily homelessness*           |     |            |                |        |      |
| 1 week or more                      | 62  | 0.82       | 0.81           | 0.12   | 3.40 |
| Others                              | 834 | 1          |                |        |      |
| Death of family members or friends* |     |            |                |        |      |
| Yes                                 | 175 | 0.58       | 0.28           | 0.18   | 1.51 |
| None                                | 719 | 1          |                |        |      |
| Complete loss of job*               |     |            |                |        |      |
| Yes                                 | 51  | 2.23       | 0.28           | 0.47   | 7.87 |
| None                                | 848 | 1          |                |        |      |
| Anxiety about family finances*      |     |            |                |        |      |

|                                  |     |      |      |      |      |
|----------------------------------|-----|------|------|------|------|
| Yes                              | 312 | 1.06 | 0.89 | 0.47 | 2.26 |
| None                             | 587 | 1    |      |      |      |
| Changes in daily dietary intake* |     |      |      |      |      |
| Yes                              | 269 | 1.26 | 0.55 | 0.58 | 2.62 |
| None                             | 626 | 1    |      |      |      |
| Discontinuation of medications   |     |      |      |      |      |
| 1 week or more                   | 69  | 0.36 | 0.26 | 0.02 | 1.80 |
| None                             | 834 | 1    |      |      |      |

CI, Confidence interval. \* Information on several patients about age, smoking status, damage to houses, temporarily homelessness, death of family members or friends, complete loss of job, anxiety about family finances, and changes in daily dietary intake was not available.

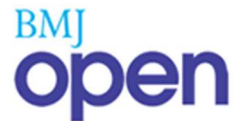

**Life-event stress induced by the Great East Japan Earthquake caused relapse in ulcerative colitis but not in Crohn's disease: a retrospective cohort study**

|                                 |                                                                                                                                                                                                                                                                                                                                                                                                                                                                                                                                                                                                                                                                                                                                                                                                                                                                                                                                                                                                                                                                                                                                                                                                                                                                                                                                                                                                                                                                                                                    |
|---------------------------------|--------------------------------------------------------------------------------------------------------------------------------------------------------------------------------------------------------------------------------------------------------------------------------------------------------------------------------------------------------------------------------------------------------------------------------------------------------------------------------------------------------------------------------------------------------------------------------------------------------------------------------------------------------------------------------------------------------------------------------------------------------------------------------------------------------------------------------------------------------------------------------------------------------------------------------------------------------------------------------------------------------------------------------------------------------------------------------------------------------------------------------------------------------------------------------------------------------------------------------------------------------------------------------------------------------------------------------------------------------------------------------------------------------------------------------------------------------------------------------------------------------------------|
| Journal:                        | <i>BMJ Open</i>                                                                                                                                                                                                                                                                                                                                                                                                                                                                                                                                                                                                                                                                                                                                                                                                                                                                                                                                                                                                                                                                                                                                                                                                                                                                                                                                                                                                                                                                                                    |
| Manuscript ID:                  | bmjopen-2012-002294.R1                                                                                                                                                                                                                                                                                                                                                                                                                                                                                                                                                                                                                                                                                                                                                                                                                                                                                                                                                                                                                                                                                                                                                                                                                                                                                                                                                                                                                                                                                             |
| Article Type:                   | Research                                                                                                                                                                                                                                                                                                                                                                                                                                                                                                                                                                                                                                                                                                                                                                                                                                                                                                                                                                                                                                                                                                                                                                                                                                                                                                                                                                                                                                                                                                           |
| Date Submitted by the Author:   | 05-Dec-2012                                                                                                                                                                                                                                                                                                                                                                                                                                                                                                                                                                                                                                                                                                                                                                                                                                                                                                                                                                                                                                                                                                                                                                                                                                                                                                                                                                                                                                                                                                        |
| Complete List of Authors:       | Shiga, Hisashi; Tohoku University Graduate School of Medicine, Division of Gastroenterology<br>Miyazawa, Teruko; Tohoku University Graduate School of Medicine, Division of Gastroenterology<br>Kinouchi, Yoshitaka; Tohoku University Graduate School of Medicine, Division of Gastroenterology<br>Takahashi, Seiichi; Tohoku University Graduate School of Medicine, Division of Gastroenterology<br>Tominaga, Gen; Japanese Red Cross Ishinomaki Hospital,<br>Takahashi, Hiroki; Sendai Medical Center,<br>Takagi, Sho; Takagi Clinic,<br>Obana, Nobuya; Osaki Citizen Hospital,<br>Kikuchi, Tatsuya; Sendai City Hospital,<br>Oomori, Shinya; Japanese Red Cross Sendai Hospital,<br>Nomura, Eiki; Miyagi Cancer Center,<br>Shiraki, Manabu; Iwate Prefectural Isawa Hospital,<br>Sato, Yuichirou; Osaki Citizen Hospital,<br>Takahashi, Shuichiro; Iwate Prefectural Chubu Hospital,<br>Umemura, Ken; South Miyagi Medical Center,<br>Yokoyama, Hiroshi; Iwate Prefectural Iwai Hospital,<br>Endo, Katsuya; Tohoku University Graduate School of Medicine, Division of Gastroenterology<br>Kakuta, Yoichi; Tohoku University Graduate School of Medicine, Division of Gastroenterology<br>Aizawa, Hiroki; Kesenuma City Hospital,<br>Matsuura, Masaki; Japanese Red Cross Ishinomaki Hospital,<br>Kimura, Tomoya; Iwate Prefectural Isawa Hospital,<br>Kuroha, Masatake; Iwate Prefectural Isawa Hospital,<br>Shimosegawa, Tooru; Tohoku University Graduate School of Medicine, Division of Gastroenterology |
| <b>Primary Subject Heading</b>: | Gastroenterology and hepatology                                                                                                                                                                                                                                                                                                                                                                                                                                                                                                                                                                                                                                                                                                                                                                                                                                                                                                                                                                                                                                                                                                                                                                                                                                                                                                                                                                                                                                                                                    |
| Secondary Subject Heading:      | Medical management, Mental health, Occupational and environmental medicine, Public health, Smoking and tobacco                                                                                                                                                                                                                                                                                                                                                                                                                                                                                                                                                                                                                                                                                                                                                                                                                                                                                                                                                                                                                                                                                                                                                                                                                                                                                                                                                                                                     |
| Keywords:                       | earthquake, ulcerative colitis, Crohn's disease, Inflammatory bowel disease < GASTROENTEROLOGY, relapse                                                                                                                                                                                                                                                                                                                                                                                                                                                                                                                                                                                                                                                                                                                                                                                                                                                                                                                                                                                                                                                                                                                                                                                                                                                                                                                                                                                                            |

1  
2  
3  
4  
5  
6  
7  
8  
9  
10  
11  
12  
13  
14  
15  
16  
17  
18  
19  
20  
21  
22  
23  
24  
25  
26  
27  
28  
29  
30  
31  
32  
33  
34  
35  
36  
37  
38  
39  
40  
41  
42  
43  
44  
45  
46  
47  
48  
49  
50  
51  
52  
53  
54  
55  
56  
57  
58  
59  
60

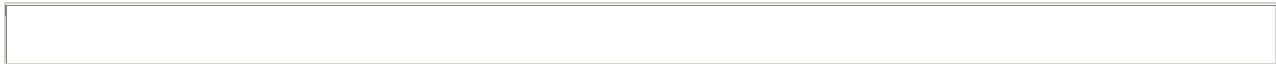

SCHOLARONE™  
Manuscripts

For peer review only

1  
2  
3  
4  
5  
6 **Original research article: Life-event stress induced by the Great East Japan**

7  
8  
9 **Earthquake caused relapse in ulcerative colitis but not in Crohn's disease: a**  
10  
11 **retrospective cohort study**

12  
13  
14 **Short title: Relapse of Ulcerative colitis by the Great East Japan Earthquake**

15  
16  
17  
18  
19  
20 Hisashi Shiga, MD, PhD <sup>1</sup>, Teruko Miyazawa, MD <sup>1</sup>, Yoshitaka Kinouchi, MD, PhD <sup>1</sup>, Seiichi  
21  
22 Takahashi, MD, PhD <sup>1</sup>, Gen Tominaga, MD, PhD <sup>2</sup>, Hiroki Takahashi, MD, PhD <sup>3</sup>, Sho Takagi,  
23  
24 MD, PhD <sup>4</sup>, Nobuya Obana, MD, PhD <sup>5</sup>, Tatsuya Kikuchi, MD, PhD <sup>6</sup>, Shinya Oomori, MD,  
25  
26 PhD <sup>7</sup>, Eiki Nomura, MD, PhD <sup>8</sup>, Manabu Shiraki, MD, PhD <sup>9</sup>, Yuichirou Sato, MD, PhD <sup>5</sup>,  
27  
28 Shuichiro Takahashi, MD, PhD <sup>10</sup>, Ken Umemura, MD <sup>11</sup>, Hiroshi Yokoyama, MD, PhD <sup>12</sup>,  
29  
30 Katsuya Endo, MD, PhD <sup>1</sup>, Yoichi Kakuta, MD, PhD <sup>1</sup>, Hiroki Aizawa, MD, PhD <sup>13</sup>, Masaki  
31  
32 Matsuura, MD, PhD <sup>2</sup>, Tomoya Kimura, MD, PhD <sup>9</sup>, Masatake Kuroha, MD, PhD <sup>9</sup>, Tooru  
33  
34 Shimosegawa, MD, PhD, Professor <sup>1</sup>

35  
36  
37  
38  
39  
40  
41  
42  
43  
44 <sup>1</sup> Division of Gastroenterology, Tohoku University Graduate School of Medicine, Sendai,  
45  
46 JAPAN, <sup>2</sup> Japanese Red Cross Ishinomaki Hospital, Ishinomaki, JAPAN, <sup>3</sup> Sendai Medical  
47  
48 Center, Sendai, JAPAN, <sup>4</sup> Takagi Clinic, Sendai, JAPAN, <sup>5</sup> Osaki Citizen Hospital, Osaki,  
49  
50 JAPAN, <sup>6</sup> Sendai City Hospital, Sendai, JAPAN, <sup>7</sup> Japanese Red Cross Sendai Hospital, Sendai,  
51  
52 JAPAN, <sup>8</sup> Miyagi Cancer Center, Natori, JAPAN, <sup>9</sup> Iwate Prefectural Isawa Hospital, Oshu,  
53  
54  
55  
56  
57  
58  
59  
60

1  
2  
3  
4  
5  
6 JAPAN, <sup>10</sup> Iwate Prefectural Chubu Hospital, Kitakami, JAPAN, <sup>11</sup> South Miyagi Medical  
7  
8  
9 Center, Ogawara, JAPAN, <sup>12</sup> Iwate Prefectural Iwai Hospital, Ichinoseki, JAPAN, <sup>13</sup>  
10  
11  
12 Kesenuma City Hospital, Kesenuma, JAPAN

13  
14  
15 Hisashi Shiga and Teruko Miyazawa contributed equally to this work.  
16  
17

18  
19  
20 Word count: 2,692 words (Abstract 292 words, Total 2,984 words)  
21  
22

23  
24 Source of support: This study is not supported by grants from governmental agencies, private  
25  
26 sources, or manufacturers of drugs or equipment.  
27  
28

29  
30  
31  
32 Corresponding author  
33

34  
35 Hisashi Shiga  
36  
37

38 Division of Gastroenterology, Tohoku University Graduate School of Medicine,  
39

40  
41 1-1 Seiryō, Aoba, Sendai, 980-8574, Japan  
42

43  
44 Tel: +81 227177171, Fax: +81 227177177  
45

46  
47 *E-mail address:* [shiga@med.tohoku.ac.jp](mailto:shiga@med.tohoku.ac.jp)  
48  
49  
50  
51  
52  
53  
54  
55  
56  
57  
58  
59  
60

## Abstract

Objective: Stress is thought to be one of the triggers of flares in patients with inflammatory bowel disease (IBD). We examined the rate of relapse in IBD patients before and after the Great East Japan Earthquake.

Design: A retrospective cohort study.

Settings: 13 hospitals in Japan.

Participants: 546 ulcerative colitis (UC) and 357 Crohn's disease (CD) patients who received outpatient and inpatient care at 13 hospitals located in the area which suffered serious damage from the earthquake. Data on patient's clinical characteristics, disease activity and deleterious effects of the earthquake were obtained from questionnaires and hospital records.

Primary outcome: We evaluated the relapse rate (from inactive to active) across two consecutive months before and two consecutive months after the earthquake, respectively. In this study, we defined "active" as conditions with a partial Mayo score = 2 or more (UC) or a Harvey-Bradshaw index = 6 or more (CD).

Results: Among the UC patients, disease was active in 167 patients and inactive in 379 patients before the earthquake. After the earthquake, activity scores significantly increased ( $P < 0.0001$ ).

A total of 86 patients relapsed (relapse rate = 15.8 %). The relapse rate was about twice that of the corresponding period in the previous year. Among the CD patients, 86 patients had active

1  
2  
3  
4  
5  
6 disease and 271 had inactive disease before the earthquake. After the earthquake, activity  
7  
8  
9 indices changed little. A total of 25 patients experienced relapse (relapse rate = 7.0 %). The  
10  
11  
12 relapse rate did not differ from that of the corresponding period in the previous year.  
13  
14  
15 Multivariate analyses revealed that UC, changes in dietary oral intake and anxiety about the  
16  
17  
18 family finances were associated with the relapse.  
19

20  
21 Conclusion: Life-event stress induced by the Great East Japan Earthquake caused relapse in UC  
22  
23  
24 but not in CD.

25  
26 (294 words)  
27  
28  
29  
30  
31

### 32 **Keywords**

33  
34  
35 earthquake, ulcerative colitis, Crohn's disease, relapse  
36  
37  
38  
39  
40  
41  
42  
43  
44  
45  
46  
47  
48  
49  
50  
51  
52  
53  
54  
55  
56  
57  
58  
59  
60



## Article summary

### Article focus

Stress is thought to be one of the triggers of flares in patients with inflammatory bowel disease (IBD); however, it is not ethical to impose stressful circumstances on IBD patients in order to examine their effects.

Disease onset or aggravation of cardiovascular disease, respiratory disease, peptic ulcer, etc. was reported to increase after the huge earthquake; however, there has been no report about flares of IBD caused by the huge earthquake.

### Key messages

We examined the rate of relapse in IBD patients before and after the huge earthquake, the Great East Japan Earthquake of 11 March 2011 in Japan.

Life-event stress induced by the earthquake caused relapse in ulcerative colitis (UC) but not in Crohn's disease.

This report indicates that we should take care of stress in the management of patients with IBD, especially with UC.

### Strengths and limitations of this study

This is the first report that investigated activities of a large number of IBD patients before and after the huge earthquake.

1  
2  
3  
4  
5  
6  
7  
8  
9  
10  
11  
12  
13  
14  
15  
16  
17  
18  
19  
20  
21  
22  
23  
24  
25  
26  
27  
28  
29  
30  
31  
32  
33  
34  
35  
36  
37  
38  
39  
40  
41  
42  
43  
44  
45  
46  
47  
48  
49  
50  
51  
52  
53  
54  
55  
56  
57  
58  
59  
60

We did not use validated scores that would objectively assess psychological stress, because it is impossible to investigate stress several times before and after an unexpected earthquake.

Our study cannot disregard recall bias.

For peer review only

## Introduction

Inflammatory bowel disease (IBD) is a chronic remitting/relapsing disease. No variable has been proven to be a trigger of flares in patients with IBD. Stress has been indicated as one possible trigger of flares.<sup>1 2 3 4 5 6 7 8</sup> On the other hand, some reports did not prove a relationship between psychological stress and flares of IBD.<sup>9 10 11</sup> A prospective or well-established case-controlled study should be undertaken to determine whether stress is actually related to flares of IBD; however, it is unethical to impose stressful circumstances on IBD patients in order to examine their effects.

On 11 March 2011, Japan was hit by one of the most powerful earthquakes in recorded history, the Great East Japan Earthquake. The disaster left more than 28,000 people dead or missing, caused great damage or hardship in daily life, and also caused profound stress for all of the people, even those who did not suffer individual losses. It was surely one of the most stressful life events and might contribute to relapse in IBD patients. In terms of earthquake-induced disease onset or aggravation, cardiovascular disease, respiratory disease, diabetes mellitus, hypertension and peptic ulcer were reported to increase after the huge earthquake.<sup>12 13 14 15 16 17</sup> However, there has been no report about flares of IBD caused by the huge earthquake.

1  
2  
3  
4  
5  
6  
7  
8  
9  
10  
11  
12  
13  
14  
15  
16  
17  
18  
19  
20  
21  
22  
23  
24  
25  
26  
27  
28  
29  
30  
31  
32  
33  
34  
35  
36  
37  
38  
39  
40  
41  
42  
43  
44  
45  
46  
47  
48  
49  
50  
51  
52  
53  
54  
55  
56  
57  
58  
59  
60

In this study, we examined activities of IBD patients before and after the Great East Japan Earthquake, to evaluate the relapse rate and the remission rate induced by the earthquake. We also aimed to identify factors that were related to relapse or remission of IBD.

For peer review only

## Materials and methods

### Study subjects

Thirteen hospitals (Tohoku University Hospital, Japanese Red Cross Ishinomaki Hospital, Sendai Medical Center, Takagi Clinic, Osaki Citizen Hospital, Sendai City Hospital, Japanese Red Cross Sendai Hospital, Miyagi Cancer Center, South Miyagi Medical Center and Kesenuma City Hospital in Miyagi Prefecture; Iwate Prefectural Isawa Hospital, Iwate Prefectural Chubu Hospital, Iwate Prefectural Iwai Hospital in Iwate Prefecture) participated in this study. These hospitals are located in the area that suffered serious damage from the Great East Japan Earthquake. We sent a total of 1,080 questionnaires to ulcerative colitis (UC) and Crohn's disease (CD) patients who received care in these hospitals. Then we examined the hospital records for data on the patients who returned a questionnaire. Hospital data contained information such as gender, age, IBD duration, disease extent (total colitis, left-sided colitis and proctitis in UC), disease location (small intestine, colon and both in CD), extra-intestinal complications, use of medications, smoking status, and pregnancy experience. Written informed consent was obtained from all participants under the protocol approved by the Tohoku University Hospital Committee for Clinical Investigation.

To evaluate the degree of stress objectively, we also obtained data about each patient's situation regarding the earthquake, such as damage to the patient's house, duration of

1  
2  
3  
4  
5  
6 temporarily homelessness, deaths of family member or friends, changes in daily dietary intake,  
7  
8  
9 discontinuation or delay in taking medications, loss of job, family finances and changes in  
10  
11 smoking status. We divided housing damage into 4 groups according to the degree of damage to  
12  
13 the house; total loss ( $\geq 50\%$ ), half-loss ( $\geq 20\%$  but  $< 50\%$ ), partial loss ( $\geq 3\%$  but  $< 20\%$ ) and no  
14  
15 damage.  
16  
17  
18  
19

20 We evaluated disease activity for two consecutive months before and two consecutive  
21  
22 months after the Great East Japan Earthquake using Mayo score for UC<sup>18</sup> or Harvey-Bradshaw  
23  
24 index for CD<sup>19</sup> that had been noted in hospital records and questionnaires. The Mayo score is  
25  
26 comprised of information on stool frequency, rectal bleeding, findings on endoscopy and a  
27  
28 physician's global assessment. Scores can range from 0 to 12. However, we used a partial Mayo  
29  
30 score (range from 0 to 9) that excluded findings on endoscopy because routine endoscopic  
31  
32 examinations were not performed so soon after the earthquake. The Harvey-Bradshaw index is  
33  
34 comprised of information on general condition, abdominal pain, diarrhea frequency, abdominal  
35  
36 mass and complications. Higher scores for both the Mayo score and the Harvey-Bradshaw index  
37  
38 indicate more severe disease activity. IBD patients having a stoma were excluded because of  
39  
40 difficulties in the count of bowel movements.  
41  
42  
43  
44  
45  
46  
47  
48  
49  
50

51  
52 In this study, "active" was defined as follows; a partial Mayo score = 2 or more (UC) and a  
53  
54 Harvey-Bradshaw index = 6 or more (CD). Lower scores indicated inactive disease. We defined  
55  
56  
57  
58  
59  
60

1  
2  
3  
4  
5  
6 “relapse” as a change from inactive to active and “remission” as a change from active to  
7  
8  
9 inactive across the 2-months before and 2-months after the earthquake. The patients who  
10  
11  
12 remained active or inactive during the study period were considered to have “stable disease”.  
13  
14  
15 We compared the relapse and remission rates with those during the corresponding period in the  
16  
17  
18 previous year as controls.  
19  
20  
21  
22

### 23 **Statistical analysis**

24  
25  
26 Quantitative data are presented as mean  $\pm$  standard deviation (SD). Discrete variables are  
27  
28  
29 presented as median and range. All statistical analyses were performed using the JMP version 9  
30  
31  
32 (SAS Institute Inc., Cary, NC, USA). Differences between two groups were evaluated using  
33  
34  
35 chi-square test or Fisher’s exact probability test, unpaired t-test or Wilcoxon signed-rank test, as  
36  
37  
38 appropriate. A multiple logistic regression method that included all possible variables was used.  
39  
40  
41 The level of statistical significance was set at  $P < 0.05$ .  
42  
43  
44  
45  
46  
47  
48  
49  
50  
51  
52  
53  
54  
55  
56  
57  
58  
59  
60

## Results

### Patients' clinical characteristics

A total of 903 completed questionnaires (from 546 UC and 357 CD) were returned to us. The response rate to the questionnaire was 83.6% (903/1080). We examined the hospital records for each patient. Of the UC patients, 269 (49.3%) were males and 277 (50.7%) were females. The mean age of the entire group was of  $45.3 \pm 16.6$  years and mean disease duration was  $9.7 \pm 9.0$  years. Extent of disease was as follows; 208 patients (38.1%), total colitis (over splenic flexure); 183 (33.5%), left-sided colitis (up to splenic flexure); and 83 (15.2%), proctitis (up to rectum). Extent was unknown in 72 patients (13.2%). Among the CD patients, there were 253 males (70.9%) and 104 females (29.1%). Mean age was  $37.1 \pm 12.5$  years and mean disease duration was  $11.6 \pm 8.1$  years. Location of disease was as follows; 61 patients (17.1%), small intestine; 47 (13.2%), colon; and 212 (59.4%), both small intestine and colon. Location was unknown in 37 patients (10.3%) (Table 1).

Fifty-one UC (9.3%) and 43 CD (12.0%) patients experienced extra-intestinal complications. Of the UC patients, 55 patients (10.1%) were current smokers and 162 (29.7%) were past smokers. On the other hand, 85 CD patients (23.8%) were current smokers, and 74 (20.7%) were past smokers. Of 277 females with UC, 181 (65.3%) had experienced pregnancy while only 41 of 104 CD females (39.4%) had experienced pregnancy. Five UC patients and 3 CD



1  
2  
3  
4  
5  
6 patients were just pregnant when the earthquake occurred (Table 1). Medications used by the  
7  
8  
9 IBD patients before the earthquake are shown in Table 2.

### 10 11 12 13 14 15 **Deleterious effects of the earthquake**

16  
17  
18 Of the 903 IBD patients, the houses of 501 patients (55.5%) were damaged; partial loss was  
19  
20 experienced by 369 patients (40.9%), half-loss by 58 (6.4%), and total loss by 74 (8.2%). As a  
21  
22 result, 62 (6.9%) patients had to stay in refuge facilities for one week or more. A total of 175  
23  
24 patients (19.4%) experienced the death of a family member or a friend (Table 3).

25  
26  
27  
28  
29 Only 51 patients (5.7%) experienced complete loss of their jobs after the earthquake.  
30  
31  
32 However, 279 (30.9%) and 157 (17.4%) patients felt short-term (for the next several months)  
33  
34 and long-term (for the next several years) anxiety about their family finances, respectively  
35  
36  
37  
38 (Table 3).

39  
40  
41 Because of temporarily homelessness and difficulty in getting the usual foods consumed,  
42  
43 changes in daily intake such as fat, vegetables, fruits, etc. were experienced by 269 patients  
44  
45 (29.8%) after the earthquake. With regard to medications, 69 patients (11.7%) interrupted  
46  
47 medications for a week or more because they had lost their medicines or could not consult with  
48  
49  
50  
51  
52  
53  
54  
55  
56  
57  
58  
59  
60 doctors (see Table 3).

### Changes in disease activity before and after the earthquake

Of the UC patients, disease was active in 167 patients (30.6%) and inactive in 379 patients (69.4%) before the earthquake. After the earthquake, activity scores significantly increased ( $P < 0.0001$ ). A total of 86 patients relapsed and disease status became inactive in 22 patients; therefore the relapse rate (from inactive to active) was 15.8% (86/546) and the remission rate (from active to inactive) was 4.0% (22/546). The relapse rate was significantly higher than in the previous year (8.8%, data not shown). On the other hand, the remission rate was significantly lower than in the previous year (8.8%, data not shown).

Of the CD patients, 86 patients (24.1%) had active disease and 271 patients (75.9%) had inactive disease before the earthquake. After the earthquake, activity indices were little changed. A total of 25 patients relapsed and disease status became inactive in 16 patients; therefore the relapse rate (from inactive to active) was 7.0% (25/357) and the remission rate (from active to inactive) was 4.5% (16/357). Unlike in UC, the relapse rate among CD patients was slightly higher than in the previous year (5.3%, data not shown), but not significantly. On the other hand, the remission rate was twice that of the previous year (2.2%, data not shown), but did not differ significantly.

Because of disease flares, 96 patients (10.6%) needed additional medications after the earthquake as follows: prednisolone (27 patients), tacrolimus (3), azathioprine (11), infliximab

1  
2  
3  
4  
5  
6 (13), adalimumab (6), total parenteral nutrition (4), or others.  
7  
8  
9

### 10 11 12 **Possible variables for relapse or remission**

13  
14  
15 There were no differences in patients' clinical characteristics between the relapse group and  
16  
17 non-relapse group. With regard to remission, there were also no differences in patients' clinical  
18  
19 characteristics between the remission group and non-remission group.  
20  
21

22  
23 Multivariate analyses revealed that UC, changes in oral intake and anxiety about the family  
24  
25 finances were independent predictors of relapse with an adjusted odds ratio (OR) of 2.86 (95%  
26  
27 confidence interval (CI), 1.73 to 4.87), 1.83 (1.16 to 2.88) and 1.69 (1.05 to 2.70), respectively  
28  
29  
30 (Table 4). On the other hand, no factor was identified as an independent predictor of remission  
31  
32  
33  
34  
35 (Table 5).  
36  
37  
38  
39  
40  
41  
42  
43  
44  
45  
46  
47  
48  
49  
50  
51  
52  
53  
54  
55  
56  
57  
58  
59  
60

## Discussion

Of the 903 IBD patients, 132 patients (14.6%) had experienced damage to their houses of half or more and 175 patients (19.4%) experienced the deaths of a family member or friends. These factors confirm that the Great East Japan Earthquake had considerable power and was certainly one of the most stressful life events that could be experienced. The response rate to the questionnaire (83.6%) was satisfactory. However, the damage caused by the earthquake might be more serious, because non-response group might include patients who took refuge in somewhere or have died. The present study showed that life-event stress induced by the Great East Japan Earthquake caused relapse in UC but not in CD. This is the first report that investigated activities of a large number of IBD patients before and after the huge earthquake.

As for patient's clinical characteristics, gender, age, IBD duration, extra-intestinal complications and smoking status did not influence flares of IBD, with the exception of IBD type (UC or CD). As mentioned above, there have been many reports that psychological stress may induce flares of UC.<sup>1 2 3 4 5 6 8</sup> On the other hand, there have been few reports about flares of CD.<sup>4 7 8</sup> Our present study demonstrated that psychological stress caused relapse in UC, but not in CD. Other clinical characteristics, including smoking status, did not induce flares. In terms of damage and other deleterious effects from the earthquake, damage to houses, duration of temporarily homelessness, death of family members or friends and unemployment did not

1  
2  
3  
4  
5  
6 induce flares of IBD; however, anxiety about family finances was related to relapse. These  
7  
8  
9 results may indicate that psychological stress or the uneasiness over the future have a greater  
10  
11  
12 influence on UC flares than direct damage and losses.

13  
14 Although discontinuation of medications had no influence on flares of IBD, changes in daily  
15  
16 dietary intake induced flares. The relation between dietary factors and the onset or flares of IBD  
17  
18 has been reported.<sup>20 21 22</sup> After the earthquake, many patients could not obtain enough food;  
19  
20 therefore they consumed more processed foods and less raw vegetables and fruits. With regard  
21  
22 to possible variables for remission, we expected that the decrease in total volume or fatty foods  
23  
24 would induce remission, especially in CD patients. However, our results did not consistent with  
25  
26 this hypothesis. It may be due to the facts that the period of dietary restriction was not so long,  
27  
28 and food rationing began soon. There were just few patients that had changes in smoking status  
29  
30 after the earthquake; therefore we could not include this factor in multivariate analyses.  
31  
32 However, changes in smoking status may be an important factor in flares of patients with UC,  
33  
34 but not with CD. Of the 9 UC patients who stopped smoking after the earthquake, 7 experienced  
35  
36 relapse ( $P = 0.002$ ). Beaugerie et al. had reported that among smokers with UC who stopped  
37  
38 smoking, disease severity increased after cessation.<sup>23</sup> Over the short term, smoking itself did  
39  
40 not have an influence on relapse or remission; however, changes in smoking status caused flares  
41  
42  
43  
44  
45  
46  
47  
48  
49  
50  
51  
52  
53  
54  
55  
56  
57  
58  
59  
60 in UC.

1  
2  
3  
4  
5  
6 Our study had some limitations. First, we did not use validated scores that would objectively  
7  
8 assess psychological stress such as the Cohen Perceived Stress Scale.<sup>24</sup> Since a huge earthquake  
9  
10 happens suddenly, it is impossible to investigate stress several times before and after an  
11  
12 earthquake. Therefore we assessed the degree of stress by investigating information about  
13  
14 damage situations and changes in life styles after the Great East Japan Earthquake. Second, our  
15  
16 study cannot disregard recall bias. It was difficult to administer a questionnaire immediately  
17  
18 after the earthquake. That was why we obtained data about clinical characteristics and activities  
19  
20 from both questionnaires and medical records. Third, non-steroidal anti-inflammatory drugs  
21  
22 (NSAIDs) and antibiotics may contribute to the relapse of IBD.<sup>25</sup> However, we think the  
23  
24 numbers of newly prescribed NSAIDs and antibiotics during the study period were less than or  
25  
26 equal to those of the corresponding period in the previous year. Because of the difficulty in  
27  
28 obtaining medicines after the earthquake, the number of newly prescribed NSAIDs and  
29  
30 antibiotics might have decreased. In addition, unlike in UC patients, twice as many males as  
31  
32 females were among CD patients, which is in agreement with previous reports in Japan.<sup>26 27 28</sup>  
33  
34  
35  
36  
37  
38  
39  
40  
41  
42  
43  
44  
45  
46  
47  
48  
49  
50  
51  
52  
53  
54  
55  
56  
57  
58  
59  
60

There were more current smokers among CD patients than among those with UC, in agreement with previous reports.<sup>8 20</sup>

Life-event stress induced by the Great East Japan Earthquake caused relapse in UC but not in CD. We hope that this report will help in the usual management of patients with IBD, not only

1  
2  
3  
4  
5  
6 at times of catastrophic events such as a huge earthquake. For the future, a prospective study  
7  
8  
9 should be undertaken to determine whether stress is actually related to flares of IBD.  
10

### 11 12 13 14 15 **Contributorship statement**

16  
17 Hisashi Shiga and Teruko Miyazawa had the original idea for this study and were involved in  
18  
19  
20 writing the original study protocol, data collection and writing manuscript.  
21

22  
23 Gen Tominaga, Hiroki Takahashi, Sho Takagi, Nobuya Obana, Tatsuya Kikuchi, Shinya  
24

25  
26 Oomori, Eiki Nomura, Manabu Shiraki, Yuichirou Sato, Shuichiro Takahashi, Ken Umemura,  
27

28  
29 Hiroshi Yokoyama, Katsuya Endo, Yoichi Kakuta, Hiroki Aizawa, Masaki Matsuura, Tomoya  
30

31  
32 Kimura and Masatake Kuroha were involved in data collection and contributed to discussion.  
33

34  
35 Yoshitaka Kinouchi, Seiichi Takahashi and Tooru Shimosegawa contributed to discussion and  
36  
37 reviewed manuscript.  
38

39  
40 All authors had full access to all of the data in this study and can take responsibility for the  
41  
42 integrity of the data and the accuracy of the data analysis.  
43  
44

### 45 46 47 **Funding**

48  
49 This study is not supported by grants from governmental agencies, private sources, or  
50

51  
52 manufacturers of drugs or equipment. This study was performed within the health insurance  
53  
54 treatment.  
55  
56

**Declaration of interest**

All authors have completed the Unified Competing Interest form at [www.icmje.org/coi\\_disclosure.pdf](http://www.icmje.org/coi_disclosure.pdf) (available on request from the corresponding author) and declare that (1) no support from any organisations for the submitted work; (2) no financial relationships with any organisations that might have an interest in the submitted work in the previous 3 years; (3) no other relationships or activities that could appear to have influenced the submitted work.

**Ethical approval**

This study was approved by the Tohoku University Hospital Committee for Clinical Investigation. Data are presented in aggregate and no personal health information is disclosed.

**Data sharing**

No additional data available.



## References

1. Mawdsley JE, Rampton DS. Psychological stress in IBD: new insights into pathogenic and therapeutic implications. *Gut* 2005; 54: 1481–91.
2. Levenstein S, Prantera C, Varvo V, et al. Stress and exacerbation in ulcerative colitis: A prospective study of patients enrolled in remission. *Am J Gastroenterol* 2000; 95: 1213–20.
3. Bitton A, Sewitch MJ, Peppercorn MA, et al. Psychosocial determinants of relapse in ulcerative colitis: a longitudinal study. *Am J Gastroenterol* 2003; 98: 2203–8.
4. Mittermaier C, Dejaco C, Waldhoer T, et al. Impact of depressive mood on relapse in patients with inflammatory bowel disease: a prospective 18-month follow-up study. *Psychosom Med* 2004; 66: 79-84.
5. Mawdsley JE, Macey MG, Feakins RM, et al. The effect of acute psychologic stress on systemic and rectal mucosal measures of inflammation in ulcerative colitis. *Gastroenterology* 2006; 131: 410-9.
6. Maunder RG, Greenberg GR, Nolan RP, et al. Autonomic response to standardized stress predicts subsequent disease activity in ulcerative colitis. *Eur J Gastroenterol Hepatol* 2006; 18: 413–420.
7. Bitton A, Dobkin P, Edwardes MD, et al. Predicting relapse in Crohn’s disease: a

- 1  
2  
3  
4  
5  
6 biopsychosocial model. *Gut* 2008; 57: 1386–92.
- 7  
8
- 9 8. Bernstein CN, Singh S, Graff LA, et al. A prospective population-based study of triggers of  
10  
11 symptomatic flares in IBD. *Am J Gastroenterol* 2010; 105: 1994–2002.
- 12  
13
- 14 9. North CS, Alpers DH, Helzer JE, et al. Do life events or depression exacerbate  
15  
16 inflammatory bowel disease? A prospective study. *Ann Intern Med* 1991; 114: 381–386.
- 17  
18
- 19 10. Vidal A, Gomez-Gil E, Sans M, et al. Life events and inflammatory bowel disease relapse:  
20  
21 a prospective study of patients enrolled in remission. *Am J Gastroenterol* 2006; 101:  
22  
23 775–781.
- 24  
25  
26  
27  
28
- 29 11. Mikocka-Walus AA, Turnbull DA, Moulding NT, et al. Does psychological status  
30  
31 influence clinical outcomes in patients with inflammatory bowel disease (IBD) and other  
32  
33 chronic gastroenterological diseases: an observational cohort prospective study.  
34  
35  
36  
37  
38 *Biopsychosoc Med* 2008; 2: 11-19.
- 39  
40
- 41 12. Takakura R, Himeno S, Kanayama Y, et al. Follow-up after the Hanshin-Awaji earthquake:  
42  
43 diverse influences on pneumonia, bronchial asthma, peptic ulcer and diabetes mellitus.  
44  
45  
46  
47  
48 *Intern Med* 1997; 36: 87-91.
- 49  
50
- 51 13. Matsuoka T, Yoshioka T, Oda J, et al. The impact of a catastrophic earthquake on  
52  
53 morbidity rates for various illnesses. *Public Health* 2000; 114: 249-53.
- 54  
55  
56
- 57 14. Aoyama N, Kinoshita Y, Fujimoto S, et al. Peptic ulcers after the Hanshin-Awaji  
58  
59  
60

- 1  
2  
3  
4  
5  
6 earthquake: increased incidence of bleeding gastric ulcers. *Am J Gastroenterol* 1998; 93:  
7  
8  
9 311-6.
- 10  
11  
12 15. Aoki T, Fukumoto Y, Yasuda S, et al. The Great East Japan Earthquake Disaster and  
13  
14 cardiovascular diseases. *Eur Heart J* 2012 Aug 28 [Epub ahead of print].
- 15  
16  
17  
18 16. Ogawa S, Ishiki M, Nako K, et al. Effects of the Great East Japan Earthquake and huge  
19  
20 tsunami on glycaemic control and blood pressure in patients with diabetes mellitus. *BMJ*  
21  
22  
23 *Open* 2012; 2: e000830.
- 24  
25  
26  
27 17. Aoyagi T, Yamada M, Kunishima H, et al. Characteristics of infectious diseases in  
28  
29 hospitalized patients during the early phase after the 2011 Great East Japan earthquake:  
30  
31 pneumonia as a significant reason for hospital care. *Chest* 2012 Aug 13 [Epub ahead of  
32  
33  
34  
35 print].
- 36  
37  
38 18. Schroeder KW, Tremaine WJ, Ilstrup DM. Coated oral 5-aminosalicylic acid therapy for  
39  
40 mildly to moderately active ulcerative colitis. A randomized study. *N Engl J Med* 1987;  
41  
42  
43  
44 317: 1625-9.
- 45  
46  
47 19. Harvey RF, Bradshaw JM. A simple index of Crohn's-disease activity. *Lancet* 1980; 1:  
48  
49  
50 514.
- 51  
52  
53 20. Thornton JR, Emmett PM, Heaton KW. Smoking, sugar, and inflammatory bowel disease.  
54  
55  
56 *Br Med J*. 1985; 290: 1786-7.

- 1  
2  
3  
4  
5  
6 21. Jowett SL, Seal CJ, Pearce MS, et al. Influence of dietary factors on the clinical course of  
7  
8  
9 ulcerative colitis: a prospective cohort study. *Gut* 2004; 53: 1479-84.  
10  
11  
12 22. Jantchou P, Morois S, Clavel-Chapelon F, et al. Animal protein intake and risk of  
13  
14 inflammatory bowel disease: The E3N prospective study. *Am J Gastroenterol* 2010; 105:  
15  
16 2195-201.  
17  
18  
19  
20 23. Beaugerie L, Massot N, Carbonnel F, et al. Impact of cessation of smoking on the course of  
21  
22  
23 ulcerative colitis. *Am J Gastroenterol*. 2001; 96: 2113-6.  
24  
25  
26 24. Cohen S, Kamarck T, Mermelstein R. A global measure of perceived stress. *J Health Soc*  
27  
28  
29 *Behav* 1983; 24: 385-96.  
30  
31  
32 25. Singh S, Graff LA, Bernstein CN. Do NSAIDs, antibiotics, infections, or stress trigger  
33  
34  
35 flares in IBD? *Am J Gastroenterol* 2009; 104: 1298-313.  
36  
37  
38 26. Yao T, Matsui T, Hiwatashi N. Crohn's disease in Japan: diagnostic criteria and  
39  
40  
41 epidemiology. *Dis Colon Rectum* 2000; 43: S85-93  
42  
43  
44 27. Asakura K, Nishiwaki Y, Inoue N, et al. Prevalence of ulcerative colitis and Crohn's  
45  
46  
47 disease in Japan. *J Gastroenterol* 2009; 44: 659-65.  
48  
49  
50 28. Ishige T, Tomomasa T, Takebayashi T et al. Inflammatory bowel disease in children:  
51  
52  
53 epidemiological analysis of the nationwide IBD registry in Japan. *J Gastroenterol* 2010; 45:  
54  
55  
56 911-7.  
57  
58  
59  
60

1  
2  
3  
4  
5  
6  
7  
8  
9  
10  
11  
12  
13  
14  
15  
16  
17  
18  
19  
20  
21  
22  
23  
24  
25  
26  
27  
28  
29  
30  
31  
32  
33  
34  
35  
36  
37  
38  
39  
40  
41  
42  
43  
44  
45  
46  
47  
48  
49  
50  
51  
52  
53  
54  
55  
56  
57  
58  
59  
60

## Tables

Table 1. Patients' clinical characteristics.

|                                | Ulcerative colitis | Crohn's disease | Total       |             |
|--------------------------------|--------------------|-----------------|-------------|-------------|
| Number of patients             | 546                | 357             | 903         |             |
| Gender                         |                    |                 |             |             |
| Male                           | 269 (49.3%)        | 253 (70.9%)     | 522 (57.8%) |             |
| Female                         | 277 (50.7%)        | 104 (29.1%)     | 381 (42.2%) |             |
| Age                            | year               | 45.3 ± 16.6     | 37.1 ± 12.5 | 42.0 ± 15.6 |
| Disease duration               | year               | 9.7 ± 9.0       | 11.6 ± 8.1  | 10.5 ± 8.7  |
| Disease extent                 |                    |                 |             |             |
| Total colitis                  | 208 (38.1%)        | -               |             |             |
| Left-sided colitis             | 183 (33.5%)        | -               |             |             |
| Proctitis                      | 83 (15.2%)         | -               |             |             |
| Unknown                        | 72 (13.2%)         | -               |             |             |
| Disease location               |                    |                 |             |             |
| Small intestine                | -                  | 61 (17.1%)      |             |             |
| Colon                          | -                  | 212 (59.4%)     |             |             |
| Small intestine and colon      | -                  | 47 (13.2%)      |             |             |
| Unknown                        | -                  | 37 (10.3%)      |             |             |
| Extra-intestinal complications |                    |                 |             |             |
| Positive                       | 51 (9.3%)          | 43 (12.0%)      | 94 (10.4%)  |             |
| None                           | 495 (90.7%)        | 314 (88.0%)     | 809 (89.6%) |             |
| Smoking status                 |                    |                 |             |             |
| Current smokers                | 55 (10.1%)         | 85 (23.8%)      | 140 (15.5%) |             |
| Past smokers                   | 162 (29.7%)        | 74 (20.7%)      | 236 (26.1%) |             |
| None                           | 327 (59.9%)        | 198 (55.5%)     | 525 (58.2%) |             |
| Unclear                        | 2 (0.3%)           | 0 (0.0%)        | 2 (0.2%)    |             |
| Pregnancy experience           |                    |                 |             |             |
| Positive                       | 181/277            | 41/104          | 222/381     |             |
| (During the Earthquake)        | (5)                | (3)             | (8)         |             |

Table 2. Use of the medications before the Great East Japan Earthquake.

|               | Ulcerative<br>colitis<br>(N=546) | Crohn's<br>disease<br>(N=357) | Total<br>(N=903) |
|---------------|----------------------------------|-------------------------------|------------------|
| 5-ASA or SASP | 486 (89.0%)                      | 276 (77.3%)                   | 762 (84.4%)      |
| PSL           | 79 (9.0%)                        | 26 (7.3%)                     | 105 (11.6%)      |
| (mg)          | (1-60)                           | (1-40)                        |                  |
| AZA or 6-MP   | 56 (10.3%)                       | 55 (15.4%)                    | 111 (12.3%)      |
| (mg)          | (15-100)                         | (10-100)                      |                  |
| Tacrolimus    | 4 (0.7%)                         | -                             | 4 (0.4%)         |
| IFX           | 18 (3.3%)                        | 151 (42.3%)                   | 169 (18.7%)      |
| (mg)          | (200-500)                        | (150-500)                     |                  |
| ADA           | -                                | 11 (3.1%)                     | 11 (1.2%)        |
| TPN           | 0 (0.0%)                         | 3 (0.8%)                      | 3 (0.3%)         |
| ED            |                                  | 70 (19.6%)                    | 70 (7.8%)        |
| (kcal/day)    |                                  | (300-1,800)                   |                  |
| CAP           | 3 (0.5%)                         | 1 (0.3%)                      | 4 (0.4%)         |

5-ASA, aminosalicilic acid; SASP, salazosurufapirizine; PSL, predonisolone; AZA, azathioprine; MP, mercaptopurine; IFX, infliximab; ADA, adalimumab; TPN, total parenteral nutrition; ED, elemental diet; CAP, cytoapheresis.

Table 3. Damage and deleterious effects of the Great East Japan Earthquake.

|                                           | Ulcerative<br>colitis<br>(N=546) | Crohn's<br>disease<br>(N=357) | Total<br>(N=903) |
|-------------------------------------------|----------------------------------|-------------------------------|------------------|
| <b>Damage to houses</b>                   |                                  |                               |                  |
| Total loss ( $\geq 50\%$ )                | 36 (6.6%)                        | 38 (10.6%)                    | 74 (8.2%)        |
| Half-loss ( $\geq 20\%$ but $< 50\%$ )    | 37 (6.8%)                        | 21 (5.9%)                     | 58 (6.4%)        |
| Partial loss ( $\geq 3\%$ but $< 20\%$ )  | 236 (43.2%)                      | 133 (37.3%)                   | 369 (40.9%)      |
| None                                      | 233 (42.7%)                      | 161 (45.1%)                   | 394 (43.6%)      |
| Unclear                                   | 4 (0.7%)                         | 4 (1.1%)                      | 8 (0.9%)         |
| <b>Temporarily homeless</b>               |                                  |                               |                  |
| 1 week or more                            | 37 (6.8%)                        | 25 (7.0%)                     | 62 (6.9%)        |
| Less than 1 week or none                  | 503 (92.1%)                      | 331 (92.7%)                   | 834 (92.3%)      |
| Unclear                                   | 6 (1.1%)                         | 1 (0.3%)                      | 7 (0.8%)         |
| <b>Death of family members or friends</b> |                                  |                               |                  |
| Yes                                       | 106 (19.4%)                      | 69 (19.3%)                    | 175 (19.4%)      |
| None                                      | 435 (79.7%)                      | 284 (79.6%)                   | 719 (79.6%)      |
| Unclear                                   | 5 (0.9%)                         | 4 (1.1%)                      | 9 (1.0%)         |
| <b>Changes in daily dietary intake</b>    |                                  |                               |                  |
| Yes                                       | 153 (28.0%)                      | 116 (32.5%)                   | 269 (29.8%)      |
| No                                        | 387 (70.9%)                      | 239 (66.9%)                   | 626 (69.3%)      |
| Unclear                                   | 6 (1.1%)                         | 2 (0.6%)                      | 8 (0.9%)         |
| <b>Discontinuation of medications</b>     |                                  |                               |                  |
| 1 week or more                            | 39 (9.8%)                        | 30 (14.1%)                    | 69 (11.7%)       |
| None                                      | 507 (9.8%)                       | 327 (14.1%)                   | 834 (11.7%)      |
| Unclear                                   | 358 (90.2%)                      | 256 (85.9%)                   | 614 (88.3%)      |
| <b>Interruption in IFX or ADA</b>         |                                  |                               |                  |
| Yes                                       | 1/18                             | 19/162                        | 20/180           |
| <b>Complete loss of job</b>               |                                  |                               |                  |
| Yes                                       | 26 (4.8%)                        | 25 (7.0%)                     | 51 (5.7%)        |
| None                                      | 518 (94.9%)                      | 330 (92.4%)                   | 848 (93.9%)      |
| Unclear                                   | 2 (0.3%)                         | 2 (5.6%)                      | 4 (0.4%)         |
| <b>Anxiety about family finances</b>      |                                  |                               |                  |
| Yes                                       | 167 (30.6%)                      | 145 (40.6%)                   | 312 (34.6%)      |

|                                |             |             |             |
|--------------------------------|-------------|-------------|-------------|
| (Short-term anxiety)*          | (147)       | (132)       | (279)       |
| (Long-term anxiety)*           | (83)        | (74)        | (157)       |
| None                           | 376 (68.9%) | 211 (59.1%) | 587 (65.0%) |
| Unclear                        | 3 (0.5%)    | 1 (0.3%)    | 4 (0.4%)    |
| Changes in smoking status      |             |             |             |
| Stopped after the Earthquake   | 9           | 5           | 14          |
| Restarted after the Earthquake | 10          | 5           | 15          |

IFX, infliximab; ADA, Adalimumab. \* Short-term anxiety indicates anxiety about their family finances for the next several months. Long-term anxiety indicates anxiety about their family finances several years or more in the future.



Table 4. Possible variables for relapse after the Great East Japan Earthquake.

|                                     |     | Odds ratio | <i>P</i> value | 95% CI |      |
|-------------------------------------|-----|------------|----------------|--------|------|
| IBD type                            |     |            |                |        |      |
| Ulcerative colitis                  | 546 | 2.86       | < 0.0001       | 1.73   | 4.87 |
| Crohn's disease                     | 357 | 1          |                |        |      |
| Gender                              |     |            |                |        |      |
| Male                                | 522 | 0.78       | 0.26           | 0.50   | 1.20 |
| Female                              | 381 | 1          |                |        |      |
| Age*                                |     |            |                |        |      |
| More than 40 years                  | 423 | 0.72       | 0.16           | 0.45   | 1.14 |
| 40 or less                          | 479 | 1          |                |        |      |
| Disease duration                    |     |            |                |        |      |
| More than 10 years                  | 350 | 0.94       | 0.80           | 0.58   | 1.50 |
| 10 or less                          | 553 | 1          |                |        |      |
| Extra-intestinal complications      |     |            |                |        |      |
| Positive                            | 94  | 1.40       | 0.32           | 0.71   | 2.59 |
| None                                | 809 | 1          |                |        |      |
| Smoking status*                     |     |            |                |        |      |
| Current smokers                     | 140 | 0.95       | 0.88           | 0.48   | 1.76 |
| Others                              | 761 | 1          |                |        |      |
| Damage to houses*                   |     |            |                |        |      |
| Total or half loss                  | 132 | 1.01       | 0.97           | 0.52   | 1.88 |
| Others                              | 763 | 1          |                |        |      |
| Temporarily homelessness*           |     |            |                |        |      |
| 1 week or more                      | 62  | 0.97       | 0.94           | 0.41   | 2.14 |
| Others                              | 834 | 1          |                |        |      |
| Death of family members or friends* |     |            |                |        |      |
| Yes                                 | 175 | 1.20       | 0.50           | 0.70   | 2.03 |
| None                                | 719 | 1          |                |        |      |
| Complete loss of job*               |     |            |                |        |      |
| Yes                                 | 51  | 1.55       | 0.31           | 0.65   | 3.47 |
| None                                | 848 | 1          |                |        |      |
| Anxiety about family finances*      |     |            |                |        |      |

|                                  |     |      |        |      |      |
|----------------------------------|-----|------|--------|------|------|
| Yes                              | 312 | 1.69 | 0.03   | 1.05 | 2.70 |
| None                             | 587 | 1    |        |      |      |
| Changes in daily dietary intake* |     |      |        |      |      |
| Yes                              | 269 | 1.83 | < 0.01 | 1.16 | 2.88 |
| None                             | 626 | 1    |        |      |      |
| Discontinuation of medications   |     |      |        |      |      |
| 1 week or more                   | 69  | 1.49 | 0.30   | 0.69 | 2.98 |
| None                             | 834 | 1    |        |      |      |

CI, Confidence interval. \* Information on several patients about age, smoking status, damage to houses, temporarily homelessness, death of family members or friends, complete loss of job, anxiety about family finances, and changes in daily dietary intake was not available.

Table 5. Possible variables for remission after the Great East Japan Earthquake.

|                                     |     | Odds ratio | <i>P</i> value | 95% CI |      |
|-------------------------------------|-----|------------|----------------|--------|------|
| IBD type                            |     |            |                |        |      |
| Ulcerative colitis                  | 546 | 0.81       | 0.58           | 0.39   | 1.72 |
| Crohn's disease                     | 357 | 1          |                |        |      |
| Gender                              |     |            |                |        |      |
| Male                                | 522 | 0.84       | 0.62           | 0.41   | 1.72 |
| Female                              | 381 | 1          |                |        |      |
| Age*                                |     |            |                |        |      |
| More than 40 years                  | 423 | 0.89       | 0.76           | 0.41   | 1.88 |
| 40 or less                          | 479 | 1          |                |        |      |
| Disease duration                    |     |            |                |        |      |
| More than 10 years                  | 350 | 0.63       | 0.25           | 0.27   | 1.37 |
| 10 or less                          | 553 | 1          |                |        |      |
| Extra-intestinal complications      |     |            |                |        |      |
| Positive                            | 94  | 0.80       | 0.71           | 0.19   | 2.33 |
| None                                | 809 | 1          |                |        |      |
| Smoking status*                     |     |            |                |        |      |
| Current smokers                     | 140 | 0.70       | 0.52           | 0.20   | 1.90 |
| Others                              | 761 | 1          |                |        |      |
| Damage to houses*                   |     |            |                |        |      |
| Total or half loss                  | 132 | 1.07       | 0.90           | 0.33   | 2.86 |
| Others                              | 763 | 1          |                |        |      |
| Temporarily homelessness*           |     |            |                |        |      |
| 1 week or more                      | 62  | 0.82       | 0.81           | 0.12   | 3.40 |
| Others                              | 834 | 1          |                |        |      |
| Death of family members or friends* |     |            |                |        |      |
| Yes                                 | 175 | 0.58       | 0.28           | 0.18   | 1.51 |
| None                                | 719 | 1          |                |        |      |
| Complete loss of job*               |     |            |                |        |      |
| Yes                                 | 51  | 2.23       | 0.28           | 0.47   | 7.87 |
| None                                | 848 | 1          |                |        |      |
| Anxiety about family finances*      |     |            |                |        |      |

|                                  |     |      |      |      |      |
|----------------------------------|-----|------|------|------|------|
| Yes                              | 312 | 1.06 | 0.89 | 0.47 | 2.26 |
| None                             | 587 | 1    |      |      |      |
| Changes in daily dietary intake* |     |      |      |      |      |
| Yes                              | 269 | 1.26 | 0.55 | 0.58 | 2.62 |
| None                             | 626 | 1    |      |      |      |
| Discontinuation of medications   |     |      |      |      |      |
| 1 week or more                   | 69  | 0.36 | 0.26 | 0.02 | 1.80 |
| None                             | 834 | 1    |      |      |      |

CI, Confidence interval. \* Information on several patients about age, smoking status, damage to houses, temporarily homelessness, death of family members or friends, complete loss of job, anxiety about family finances, and changes in daily dietary intake was not available.

1  
2  
3  
4  
5  
6 **Original research article: Life-event stress induced by the Great East Japan**

7  
8  
9 **Earthquake caused relapse in ulcerative colitis but not in Crohn's disease: a**  
10  
11 **retrospective cohort study**

12  
13  
14 **Short title: Relapse of Ulcerative colitis by the Great East Japan Earthquake**

15  
16  
17  
18  
19  
20 Hisashi Shiga, MD, PhD <sup>1</sup>, Teruko Miyazawa, MD <sup>1</sup>, Yoshitaka Kinouchi, MD, PhD <sup>1</sup>, Seiichi  
21  
22 Takahashi, MD, PhD <sup>1</sup>, Gen Tominaga, MD, PhD <sup>2</sup>, Hiroki Takahashi, MD, PhD <sup>3</sup>, Sho Takagi,  
23  
24 MD, PhD <sup>4</sup>, Nobuya Obana, MD, PhD <sup>5</sup>, Tatsuya Kikuchi, MD, PhD <sup>6</sup>, Shinya Oomori, MD,  
25  
26 PhD <sup>7</sup>, Eiki Nomura, MD, PhD <sup>8</sup>, Manabu Shiraki, MD, PhD <sup>9</sup>, Yuichirou Sato, MD, PhD <sup>5</sup>,  
27  
28 Shuichiro Takahashi, MD, PhD <sup>10</sup>, Ken Umemura, MD <sup>11</sup>, Hiroshi Yokoyama, MD, PhD <sup>12</sup>,  
29  
30 Katsuya Endo, MD, PhD <sup>1</sup>, Yoichi Kakuta, MD, PhD <sup>1</sup>, Hiroki Aizawa, MD, PhD <sup>13</sup>, Masaki  
31  
32 Matsuura, MD, PhD <sup>2</sup>, Tomoya Kimura, MD, PhD <sup>9</sup>, Masatake Kuroha, MD, PhD <sup>9</sup>, Tooru  
33  
34 Shimosegawa, MD, PhD, Professor <sup>1</sup>

35  
36  
37  
38  
39  
40  
41  
42  
43  
44 <sup>1</sup> Division of Gastroenterology, Tohoku University Graduate School of Medicine, Sendai,  
45  
46 JAPAN, <sup>2</sup> Japanese Red Cross Ishinomaki Hospital, Ishinomaki, JAPAN, <sup>3</sup> Sendai Medical  
47  
48 Center, Sendai, JAPAN, <sup>4</sup> Takagi Clinic, Sendai, JAPAN, <sup>5</sup> Osaki Citizen Hospital, Osaki,  
49  
50 JAPAN, <sup>6</sup> Sendai City Hospital, Sendai, JAPAN, <sup>7</sup> Japanese Red Cross Sendai Hospital, Sendai,  
51  
52 JAPAN, <sup>8</sup> Miyagi Cancer Center, Natori, JAPAN, <sup>9</sup> Iwate Prefectural Isawa Hospital, Oshu,  
53  
54  
55  
56  
57  
58  
59  
60

1  
2  
3  
4  
5  
6 JAPAN, <sup>10</sup> Iwate Prefectural Chubu Hospital, Kitakami, JAPAN, <sup>11</sup> South Miyagi Medical  
7  
8  
9 Center, Ogawara, JAPAN, <sup>12</sup> Iwate Prefectural Iwai Hospital, Ichinoseki, JAPAN, <sup>13</sup>  
10  
11  
12 Kesenuma City Hospital, Kesenuma, JAPAN

13  
14  
15 Hisashi Shiga and Teruko Miyazawa contributed equally to this work.  
16

17  
18  
19  
20 Word count: 2,692 words (Abstract 292 words, Total 2,984 words)  
21

22  
23  
24 Source of support: This study is not supported by grants from governmental agencies, private  
25  
26 sources, or manufacturers of drugs or equipment.  
27

28  
29  
30  
31  
32 Corresponding author

33  
34  
35 Hisashi Shiga

36  
37  
38 Division of Gastroenterology, Tohoku University Graduate School of Medicine,

39  
40  
41 1-1 Seiryō, Aoba, Sendai, 980-8574, Japan

42  
43  
44 Tel: +81 227177171, Fax: +81 227177177

45  
46  
47 *E-mail address:* [shiga@med.tohoku.ac.jp](mailto:shiga@med.tohoku.ac.jp)  
48  
49  
50  
51  
52  
53  
54  
55  
56  
57  
58  
59  
60

## Abstract

Objective: Stress is thought to be one of the triggers of flares in patients with inflammatory bowel disease (IBD). We examined the rate of relapse in IBD patients before and after the Great East Japan Earthquake.

Design: A retrospective cohort study.

Settings: 13 hospitals in Japan.

Participants: 546 ulcerative colitis (UC) and 357 Crohn's disease (CD) patients who received outpatient and inpatient care at 13 hospitals located in the area which suffered serious damage from the earthquake. Data on patient's clinical characteristics, disease activity and deleterious effects of the earthquake were obtained from questionnaires and hospital records.

Primary outcome: We evaluated the relapse rate (from inactive to active) across two consecutive months before and two consecutive months after the earthquake, respectively. In this study, we defined "active" as conditions with a partial Mayo score = 2 or more (UC) or a Harvey-Bradshaw index = 6 or more (CD).

Results: Among the UC patients, disease was active in 167 patients and inactive in 379 patients before the earthquake. After the earthquake, activity scores significantly increased ( $P < 0.0001$ ).

A total of 86 patients relapsed (relapse rate = 15.8 %). The relapse rate was about twice that of the corresponding period in the previous year. Among the CD patients, 86 patients had active

1  
2  
3  
4  
5  
6 disease and 271 had inactive disease before the earthquake. After the earthquake, activity  
7  
8  
9 indices changed little. A total of 25 patients experienced relapse (relapse rate = 7.0 %). The  
10  
11  
12 relapse rate did not differ from that of the corresponding period in the previous year.  
13  
14  
15 Multivariate analyses revealed that UC, changes in dietary oral intake and anxiety about the  
16  
17  
18 family finances were associated with the relapse.  
19

20  
21 Conclusion: Life-event stress induced by the Great East Japan Earthquake caused relapse in UC  
22  
23  
24 but not in CD.

25  
26 (294 words)  
27  
28  
29  
30  
31

### 32 **Keywords**

33  
34  
35 earthquake, ulcerative colitis, Crohn's disease, relapse  
36  
37  
38  
39  
40  
41  
42  
43  
44  
45  
46  
47  
48  
49  
50  
51  
52  
53  
54  
55  
56  
57  
58  
59  
60



## Article summary

### Article focus

Stress is thought to be one of the triggers of flares in patients with inflammatory bowel disease (IBD); however, it is not ethical to impose stressful circumstances on IBD patients in order to examine their effects.

Disease onset or aggravation of cardiovascular disease, respiratory disease, peptic ulcer, etc. was reported to increase after the huge earthquake; however, there has been no report about flares of IBD caused by the huge earthquake.

### Key messages

We examined the rate of relapse in IBD patients before and after the huge earthquake, the Great East Japan Earthquake of 11 March 2011 in Japan.

Life-event stress induced by the earthquake caused relapse in ulcerative colitis (UC) but not in Crohn's disease.

This report indicates that we should take care of stress in the management of patients with IBD, especially with UC.

### Strengths and limitations of this study

This is the first report that investigated activities of a large number of IBD patients before and after the huge earthquake.

1  
2  
3  
4  
5  
6  
7  
8  
9  
10  
11  
12  
13  
14  
15  
16  
17  
18  
19  
20  
21  
22  
23  
24  
25  
26  
27  
28  
29  
30  
31  
32  
33  
34  
35  
36  
37  
38  
39  
40  
41  
42  
43  
44  
45  
46  
47  
48  
49  
50  
51  
52  
53  
54  
55  
56  
57  
58  
59  
60

We did not use validated scores that would objectively assess psychological stress, because it is impossible to investigate stress several times before and after an unexpected earthquake.

Our study cannot disregard recall bias.

For peer review only

## Introduction

Inflammatory bowel disease (IBD) is a chronic remitting/relapsing disease. No variable has been **proven** to be a trigger of flares in patients with IBD. Stress has been indicated as one possible trigger of flares.<sup>1 2 3 4 5 6 7 8</sup> On the other hand, some reports did not prove a relationship between psychological stress and flares of IBD.<sup>9 10 11</sup> A prospective or well-established case-controlled study should be undertaken to determine whether stress is actually related to flares of IBD; however, it is **unethical** to impose stressful circumstances on IBD patients in order to examine their effects.

On 11 March 2011, Japan was hit by one of the most powerful earthquakes in recorded history, the Great East Japan Earthquake. The disaster left more than 28,000 people dead or missing, caused great damage or hardship in **daily** life, and also caused profound stress for all of the people, even those who did not suffer individual losses. It was surely one of the most stressful life events and might contribute to relapse in IBD patients. In terms of earthquake-induced disease onset or aggravation, cardiovascular disease, respiratory disease, diabetes mellitus, hypertension and peptic ulcer were reported to increase after the huge earthquake.<sup>12 13 14 15 16 17</sup> However, there has been no report about flares of IBD caused by the huge earthquake.

1  
2  
3  
4  
5  
6  
7  
8  
9  
10  
11  
12  
13  
14  
15  
16  
17  
18  
19  
20  
21  
22  
23  
24  
25  
26  
27  
28  
29  
30  
31  
32  
33  
34  
35  
36  
37  
38  
39  
40  
41  
42  
43  
44  
45  
46  
47  
48  
49  
50  
51  
52  
53  
54  
55  
56  
57  
58  
59  
60

In this study, we examined activities of IBD patients before and after the Great East Japan Earthquake, to evaluate the relapse rate and the remission rate induced by the earthquake. We also aimed to identify factors that were related to relapse or remission of IBD.

For peer review only

## Materials and methods

### Study subjects

Thirteen hospitals (Tohoku University Hospital, Japanese Red Cross Ishinomaki Hospital, Sendai Medical Center, Takagi Clinic, Osaki Citizen Hospital, Sendai City Hospital, Japanese Red Cross Sendai Hospital, Miyagi Cancer Center, South Miyagi Medical Center and Kesenuma City Hospital in Miyagi Prefecture; Iwate Prefectural Isawa Hospital, Iwate Prefectural Chubu Hospital, Iwate Prefectural Iwai Hospital in Iwate Prefecture) participated in this study. These hospitals are located in the area that suffered serious damage from the Great East Japan Earthquake. **We sent a total of 1,080 questionnaires** to ulcerative colitis (UC) and Crohn's disease (CD) patients who received care in these hospitals. Then we examined the hospital records for data on the patients who returned a questionnaire. Hospital data contained information such as gender, age, IBD duration, disease extent (total colitis, left-sided colitis and proctitis in UC), disease location (small intestine, colon and both in CD), extra-intestinal complications, use of medications, smoking status, and pregnancy experience. Written informed consent was obtained from all participants under the protocol approved by the Tohoku University Hospital Committee for Clinical Investigation.

To evaluate the degree of stress objectively, we also obtained data about each patient's situation regarding the earthquake, such as damage to the patient's house, duration of

1  
2  
3  
4  
5  
6 temporarily homelessness, deaths of family member or friends, changes in daily dietary intake,  
7  
8  
9 discontinuation or delay in taking medications, loss of job, family finances and changes in  
10  
11 smoking status. We divided housing damage into 4 groups according to the degree of damage to  
12  
13 the house; total loss ( $\geq 50\%$ ), half-loss ( $\geq 20\%$  but  $< 50\%$ ), partial loss ( $\geq 3\%$  but  $< 20\%$ ) and no  
14  
15 damage.  
16  
17  
18  
19

20 We evaluated disease activity for two consecutive months before and two consecutive  
21  
22 months after the Great East Japan Earthquake using Mayo score for UC<sup>18</sup> or Harvey-Bradshaw  
23  
24 index for CD<sup>19</sup> that had been noted in hospital records and questionnaires. The Mayo score is  
25  
26 comprised of information on stool frequency, rectal bleeding, findings on endoscopy and a  
27  
28 physician's global assessment. Scores can range from 0 to 12. However, we used a partial Mayo  
29  
30 score (range from 0 to 9) that excluded findings on endoscopy because routine endoscopic  
31  
32 examinations were not performed so soon after the earthquake. The Harvey-Bradshaw index is  
33  
34 comprised of information on general condition, abdominal pain, diarrhea frequency, abdominal  
35  
36 mass and complications. Higher scores for both the Mayo score and the Harvey-Bradshaw index  
37  
38 indicate more severe disease activity. IBD patients having a stoma were excluded because of  
39  
40 difficulties in the count of bowel movements.  
41  
42  
43  
44  
45  
46  
47  
48  
49  
50

51  
52 In this study, "active" was defined as follows; a partial Mayo score = 2 or more (UC) and a  
53  
54 Harvey-Bradshaw index = 6 or more (CD). Lower scores indicated inactive disease. We defined  
55  
56  
57  
58  
59  
60

1  
2  
3  
4  
5  
6 “relapse” as a change from inactive to active and “remission” as a change from active to  
7  
8  
9 inactive across the 2-months before and 2-months after the earthquake. The patients who  
10  
11 remained active or inactive during the study period were considered to have “stable disease”.  
12  
13  
14 We compared the relapse and remission rates with those during the corresponding period in the  
15  
16 previous year as controls.  
17  
18  
19  
20  
21  
22

### 23 **Statistical analysis**

24  
25 Quantitative data are presented as mean  $\pm$  standard deviation (SD). Discrete variables are  
26  
27 presented as median and range. All statistical analyses were performed using the JMP version 9  
28  
29 (SAS Institute Inc., Cary, NC, USA). Differences between two groups were evaluated using  
30  
31 chi-square test or Fisher’s exact probability test, unpaired t-test or Wilcoxon signed-rank test, as  
32  
33 appropriate. A multiple logistic regression method that included all possible variables was used.  
34  
35  
36  
37  
38  
39  
40  
41 The level of statistical significance was set at  $P < 0.05$ .  
42  
43  
44  
45  
46  
47  
48  
49  
50  
51  
52  
53  
54  
55  
56  
57  
58  
59  
60

## Results

### Patients' clinical characteristics

A total of 903 completed questionnaires (from 546 UC and 357 CD) were returned to us. **The response rate to the questionnaire was 83.6% (903/1080).** We examined the hospital records for each patient. Of the UC patients, 269 (49.3%) were males and 277 (50.7%) were females. The mean age of the entire group was of  $45.3 \pm 16.6$  years and mean disease duration was  $9.7 \pm 9.0$  years. Extent of disease was as follows; 208 patients (38.1%), total colitis (over splenic flexure); 183 (33.5%), left-sided colitis (up to splenic flexure); and 83 (15.2%), proctitis (up to rectum). Extent was unknown in 72 patients (13.2%). Among the CD patients, there were 253 males (70.9%) and 104 females (29.1%). Mean age was  $37.1 \pm 12.5$  years and mean disease duration was  $11.6 \pm 8.1$  years. Location of disease was as follows; 61 patients (17.1%), small intestine; 47 (13.2%), colon; and 212 (59.4%), both small intestine and colon. Location was unknown in 37 patients (10.3%) (Table 1).

Fifty-one UC (9.3%) and 43 CD (12.0%) patients experienced extra-intestinal complications. Of the UC patients, 55 patients (10.1%) were current smokers and 162 (29.7%) were past smokers. On the other hand, 85 CD patients (23.8%) were current smokers, and 74 (20.7%) were past smokers. Of 277 females with UC, 181 (65.3%) had experienced pregnancy while only 41 of 104 CD females (39.4%) had experienced pregnancy. Five UC patients and 3 CD



1  
2  
3  
4  
5  
6 patients were just pregnant when the earthquake occurred (Table 1). Medications used by the  
7  
8  
9 IBD patients before the earthquake are shown in Table 2.

### 14 15 **Deleterious effects of the earthquake**

16  
17  
18 Of the 903 IBD patients, the houses of 501 patients (55.5%) were damaged; partial loss was  
19  
20 experienced by 369 patients (40.9%), half-loss by 58 (6.4%), and total loss by 74 (8.2%). As a  
21  
22 result, 62 (6.9%) patients had to stay in refuge facilities for one week or more. A total of 175  
23  
24 patients (19.4%) experienced the death of a family member or a friend (Table 3).

25  
26  
27  
28  
29 Only 51 patients (5.7%) experienced complete loss of their jobs after the earthquake.  
30  
31  
32 However, 279 (30.9%) and 157 (17.4%) patients felt short-term (for the next several months)  
33  
34 and long-term (for the next several years) anxiety about their family finances, respectively  
35  
36  
37 (Table 3).

38  
39  
40 Because of temporarily homelessness and difficulty in getting the usual foods consumed,  
41  
42 changes in daily intake such as fat, vegetables, fruits, etc. were experienced by 269 patients  
43  
44 (29.8%) after the earthquake. With regard to medications, 69 patients (11.7%) interrupted  
45  
46  
47 medications for a week or more because they had lost their medicines or could not consult with  
48  
49  
50 doctors (see Table 3).  
51  
52  
53  
54  
55  
56  
57  
58  
59  
60

### Changes in disease activity before and after the earthquake

Of the UC patients, disease was active in 167 patients (30.6%) and inactive in 379 patients (69.4%) before the earthquake. After the earthquake, activity scores significantly increased ( $P < 0.0001$ ). A total of 86 patients relapsed and disease status became inactive in 22 patients; therefore the relapse rate (from inactive to active) was 15.8% (86/546) and the remission rate (from active to inactive) was 4.0% (22/546). The relapse rate was significantly higher than in the previous year (8.8%, data not shown). On the other hand, the remission rate was significantly lower than in the previous year (8.8%, data not shown).

Of the CD patients, 86 patients (24.1%) had active disease and 271 patients (75.9%) had inactive disease before the earthquake. After the earthquake, activity indices were little changed. A total of 25 patients relapsed and disease status became inactive in 16 patients; therefore the relapse rate (from inactive to active) was 7.0% (25/357) and the remission rate (from active to inactive) was 4.5% (16/357). Unlike in UC, the relapse rate among CD patients was slightly higher than in the previous year (5.3%, data not shown), but not significantly. On the other hand, the remission rate was twice that of the previous year (2.2%, data not shown), but did not differ significantly.

Because of disease flares, 96 patients (10.6%) needed additional medications after the earthquake as follows: prednisolone (27 patients), tacrolimus (3), azathioprine (11), infliximab

1  
2  
3  
4  
5  
6 (13), adalimumab (6), total parenteral nutrition (4), or others.  
7  
8  
9

### 10 11 12 **Possible variables for relapse or remission**

13  
14  
15 There were no differences in patients' clinical characteristics between the relapse group and  
16  
17 non-relapse group. With regard to remission, there were also no differences in patients' clinical  
18  
19 characteristics between the remission group and non-remission group.  
20  
21

22  
23 Multivariate analyses revealed that UC, changes in oral intake and anxiety about the family  
24  
25 finances were independent predictors of relapse with an adjusted odds ratio (OR) of 2.86 (95%  
26  
27 confidence interval (CI), 1.73 to 4.87), 1.83 (1.16 to 2.88) and 1.69 (1.05 to 2.70), respectively  
28  
29  
30 (Table 4). On the other hand, no factor was identified as an independent predictor of remission  
31  
32  
33 (Table 5).  
34  
35  
36  
37  
38  
39  
40  
41  
42  
43  
44  
45  
46  
47  
48  
49  
50  
51  
52  
53  
54  
55  
56  
57  
58  
59  
60

## Discussion

Of the 903 IBD patients, 132 patients (14.6%) had experienced damage to their houses of half or more and 175 patients (19.4%) experienced the deaths of a family member or friends. These factors confirm that the Great East Japan Earthquake had considerable power and was certainly one of the most stressful life events that could be experienced. **The response rate to the questionnaire (83.6%) was satisfactory. However, the damage caused by the earthquake might be more serious, because non-response group might include patients who took refuge in somewhere or have died.** The present study showed that life-event stress induced by the Great East Japan Earthquake caused relapse in UC but not in CD. This is the first report that investigated activities of a large number of IBD patients before and after the huge earthquake.

As for patient's clinical characteristics, gender, age, IBD duration, extra-intestinal complications and smoking status did not influence flares of IBD, with the exception of IBD type (UC or CD). As mentioned above, there have been many reports that psychological stress may induce flares of UC.<sup>1 2 3 4 5 6 8</sup> On the other hand, there have been few reports about flares of CD.<sup>4 7 8</sup> Our present study demonstrated that psychological stress caused relapse in UC, but not in CD. Other clinical characteristics, including smoking status, did not induce flares. In terms of damage and other deleterious effects from the earthquake, damage to houses, duration of

1  
2  
3  
4  
5  
6 temporarily homelessness, death of family members or friends and unemployment did not  
7  
8  
9 induce flares of IBD; however, anxiety about family finances was related to relapse. These  
10  
11  
12 results may indicate that psychological stress or the uneasiness over the future have a greater  
13  
14  
15 influence on UC flares than direct damage and losses.

16  
17  
18 Although discontinuation of medications had no influence on flares of IBD, changes in daily  
19  
20 dietary intake induced flares. The relation between dietary factors and the onset or flares of IBD  
21  
22 has been reported.<sup>20 21 22</sup> After the earthquake, **many patients could not obtain enough food;**  
23  
24 **therefore they consumed more processed foods and less raw vegetables and fruits.** With  
25  
26  
27 regard to possible variables for remission, we expected that the decrease in total volume or fatty  
28  
29 foods would induce remission, especially in CD patients. However, our results did not  
30  
31 consistent with this hypothesis. It may be due to the facts that the period of dietary restriction  
32  
33 was not so long, and food rationing began soon. There were just few patients that had changes  
34  
35 in smoking status after the earthquake; therefore we could not include this factor in multivariate  
36  
37 analyses. However, changes in smoking status may be an important factor in flares of patients  
38  
39 with UC, but not with CD. Of the 9 UC patients who stopped smoking after the earthquake, 7  
40  
41 experienced relapse ( $P = 0.002$ ). Beaugerie et al. had reported that among smokers with UC  
42  
43 who stopped smoking, disease severity increased after cessation.<sup>23</sup> Over the short term,  
44  
45 smoking itself did not have an influence on relapse or remission; however, changes in smoking  
46  
47  
48  
49  
50  
51  
52  
53  
54  
55  
56  
57  
58  
59  
60

1  
2  
3  
4  
5  
6 status caused flares in UC.  
7

8  
9 Our study had some limitations. First, we did not use validated scores that would objectively  
10 assess psychological stress such as the Cohen Perceived Stress Scale.<sup>24</sup> Since a huge earthquake  
11 happens suddenly, it is impossible to investigate stress several times before and after an  
12 earthquake. Therefore we assessed the degree of stress by investigating information about  
13 damage situations and changes in life styles after the Great East Japan Earthquake. Second, our  
14 study cannot disregard recall bias. It was difficult to administer a questionnaire immediately  
15 after the earthquake. That was why we obtained data about clinical characteristics and activities  
16 from both questionnaires and medical records. Third, non-steroidal anti-inflammatory drugs  
17 (NSAIDs) and antibiotics may contribute to the relapse of IBD.<sup>25</sup> However, we think the  
18 numbers of newly prescribed NSAIDs and antibiotics during the study period were less than or  
19 equal to those of the corresponding period in the previous year. Because of the difficulty in  
20 obtaining medicines after the earthquake, the number of newly prescribed NSAIDs and  
21 antibiotics might have decreased. **In addition, unlike in UC patients, twice as many males as  
22 females were among CD patients, which is in agreement with previous reports in Japan.**<sup>26</sup>  
23  
24  
25  
26  
27  
28  
29  
30  
31  
32  
33  
34  
35  
36  
37  
38  
39  
40  
41  
42  
43  
44  
45  
46  
47  
48  
49  
50  
51  
52  
53  
54  
55  
56  
57  
58  
59  
60  
<sup>27 28</sup> There were more current smokers among CD patients than among those with UC, in  
agreement with previous reports.<sup>8 20</sup>

Life-event stress induced by the Great East Japan Earthquake caused relapse in UC but not in

1  
2  
3  
4  
5  
6 CD. We hope that this report will help in the usual management of patients with IBD, not only  
7  
8  
9 at times of catastrophic events such as a huge earthquake. For the future, a prospective study  
10  
11  
12 should be undertaken to determine whether stress is actually related to flares of IBD.  
13

### 14 15 16 17 18 **Contributorship statement**

19  
20 Hisashi Shiga and Teruko Miyazawa had the original idea for this study and were involved in  
21  
22 writing the original study protocol, data collection and writing manuscript.  
23

24  
25 Gen Tominaga, Hiroki Takahashi, Sho Takagi, Nobuya Obana, Tatsuya Kikuchi, Shinya  
26

27  
28 Oomori, Eiki Nomura, Manabu Shiraki, Yuichirou Sato, Shuichiro Takahashi, Ken Umemura,  
29

30  
31 Hiroshi Yokoyama, Katsuya Endo, Yoichi Kakuta, Hiroki Aizawa, Masaki Matsuura, Tomoya  
32

33  
34 Kimura and Masatake Kuroha were involved in data collection and contributed to discussion.  
35

36  
37 Yoshitaka Kinouchi, Seiichi Takahashi and Tooru Shimosegawa contributed to discussion and  
38  
39 reviewed manuscript.  
40  
41

42  
43 All authors had full access to all of the data in this study and can take responsibility for the  
44  
45 integrity of the data and the accuracy of the data analysis.  
46  
47

### 48 49 **Funding**

50  
51 This study is not supported by grants from governmental agencies, private sources, or  
52

53  
54 manufacturers of drugs or equipment. This study was performed within the health insurance  
55  
56

1  
2  
3  
4  
5  
6 treatment.

7  
8  
9 **Declaration of interest**

10  
11 All authors have completed the Unified Competing Interest form at  
12 [www.icmje.org/coi\\_disclosure.pdf](http://www.icmje.org/coi_disclosure.pdf) (available on request from the corresponding author) and  
13  
14  
15  
16  
17 declare that (1) no support from any organisations for the submitted work; (2) no financial  
18  
19 relationships with any organisations that might have an interest in the submitted work in the  
20  
21 previous 3 years; (3) no other relationships or activities that could appear to have influenced the  
22  
23 submitted work.  
24  
25  
26  
27

28  
29 **Ethical approval**

30  
31  
32 This study was approved by the Tohoku University Hospital Committee for Clinical  
33  
34 Investigation. Data are presented in aggregate and no personal health information is disclosed.  
35  
36

37  
38 **Data sharing**

39  
40 No additional data available.  
41  
42  
43  
44  
45  
46  
47  
48  
49  
50  
51  
52  
53  
54  
55  
56  
57  
58  
59  
60



## References

1. Mawdsley JE, Rampton DS. Psychological stress in IBD: new insights into pathogenic and therapeutic implications. *Gut* 2005; 54: 1481–91.
2. Levenstein S, Prantera C, Varvo V, et al. Stress and exacerbation in ulcerative colitis: A prospective study of patients enrolled in remission. *Am J Gastroenterol* 2000; 95: 1213–20.
3. Bitton A, Sewitch MJ, Peppercorn MA, et al. Psychosocial determinants of relapse in ulcerative colitis: a longitudinal study. *Am J Gastroenterol* 2003; 98: 2203–8.
4. Mittermaier C, Dejaco C, Waldhoer T, et al. Impact of depressive mood on relapse in patients with inflammatory bowel disease: a prospective 18-month follow-up study. *Psychosom Med* 2004; 66: 79-84.
5. Mawdsley JE, Macey MG, Feakins RM, et al. The effect of acute psychologic stress on systemic and rectal mucosal measures of inflammation in ulcerative colitis. *Gastroenterology* 2006; 131: 410-9.
6. Maunder RG, Greenberg GR, Nolan RP, et al. Autonomic response to standardized stress predicts subsequent disease activity in ulcerative colitis. *Eur J Gastroenterol Hepatol* 2006; 18: 413–420.
7. Bitton A, Dobkin P, Edwardes MD, et al. Predicting relapse in Crohn’s disease: a

- 1  
2  
3  
4  
5  
6 biopsychosocial model. *Gut* 2008; 57: 1386–92.  
7  
8  
9 8. Bernstein CN, Singh S, Graff LA, et al. A prospective population-based study of triggers of  
10  
11 symptomatic flares in IBD. *Am J Gastroenterol* 2010; 105: 1994–2002.  
12  
13  
14 9. North CS, Alpers DH, Helzer JE, et al. Do life events or depression exacerbate  
15  
16 inflammatory bowel disease? A prospective study. *Ann Intern Med* 1991; 114: 381–386.  
17  
18  
19 10. Vidal A, Gomez-Gil E, Sans M, et al. Life events and inflammatory bowel disease relapse:  
20  
21 a prospective study of patients enrolled in remission. *Am J Gastroenterol* 2006; 101:  
22  
23 775–781.  
24  
25  
26  
27  
28 11. Mikocka-Walus AA, Turnbull DA, Moulding NT, et al. Does psychological status  
29  
30 influence clinical outcomes in patients with inflammatory bowel disease (IBD) and other  
31  
32 chronic gastroenterological diseases: an observational cohort prospective study.  
33  
34  
35  
36  
37  
38 *Biopsychosoc Med* 2008; 2: 11-19.  
39  
40  
41 12. Takakura R, Himeno S, Kanayama Y, et al. Follow-up after the Hanshin-Awaji earthquake:  
42  
43 diverse influences on pneumonia, bronchial asthma, peptic ulcer and diabetes mellitus.  
44  
45  
46  
47 *Intern Med* 1997; 36: 87-91.  
48  
49  
50 13. Matsuoka T, Yoshioka T, Oda J, et al. The impact of a catastrophic earthquake on  
51  
52 morbidity rates for various illnesses. *Public Health* 2000; 114: 249-53.  
53  
54  
55 14. Aoyama N, Kinoshita Y, Fujimoto S, et al. Peptic ulcers after the Hanshin-Awaji  
56  
57  
58  
59  
60

- 1  
2  
3  
4  
5  
6 earthquake: increased incidence of bleeding gastric ulcers. *Am J Gastroenterol* 1998; 93:  
7  
8  
9 311-6.
- 10  
11  
12 15. Aoki T, Fukumoto Y, Yasuda S, et al. The Great East Japan Earthquake Disaster and  
13  
14 cardiovascular diseases. *Eur Heart J* 2012 Aug 28 [Epub ahead of print].
- 15  
16  
17  
18 16. Ogawa S, Ishiki M, Nako K, et al. Effects of the Great East Japan Earthquake and huge  
19  
20 tsunami on glycaemic control and blood pressure in patients with diabetes mellitus. *BMJ*  
21  
22  
23 *Open* 2012; 2: e000830.
- 24  
25  
26  
27 17. Aoyagi T, Yamada M, Kunishima H, et al. Characteristics of infectious diseases in  
28  
29 hospitalized patients during the early phase after the 2011 Great East Japan earthquake:  
30  
31 pneumonia as a significant reason for hospital care. *Chest* 2012 Aug 13 [Epub ahead of  
32  
33  
34  
35  
36  
37 print].
- 38  
39 18. Schroeder KW, Tremaine WJ, Ilstrup DM. Coated oral 5-aminosalicylic acid therapy for  
40  
41 mildly to moderately active ulcerative colitis. A randomized study. *N Engl J Med* 1987;  
42  
43  
44 317: 1625-9.
- 45  
46  
47 19. Harvey RF, Bradshaw JM. A simple index of Crohn's-disease activity. *Lancet* 1980; 1:  
48  
49  
50 514.
- 51  
52  
53 20. Thornton JR, Emmett PM, Heaton KW. Smoking, sugar, and inflammatory bowel disease.  
54  
55  
56 *Br Med J*. 1985; 290: 1786-7.

- 1  
2  
3  
4  
5  
6 21. Jowett SL, Seal CJ, Pearce MS, et al. Influence of dietary factors on the clinical course of  
7  
8  
9 ulcerative colitis: a prospective cohort study. *Gut* 2004; 53: 1479-84.  
10  
11  
12 22. Jantchou P, Morois S, Clavel-Chapelon F, et al. Animal protein intake and risk of  
13  
14 inflammatory bowel disease: The E3N prospective study. *Am J Gastroenterol* 2010; 105:  
15  
16 2195-201.  
17  
18  
19  
20 23. Beaugerie L, Massot N, Carbonnel F, et al. Impact of cessation of smoking on the course of  
21  
22  
23 ulcerative colitis. *Am J Gastroenterol*. 2001; 96: 2113-6.  
24  
25  
26 24. Cohen S, Kamarck T, Mermelstein R. A global measure of perceived stress. *J Health Soc*  
27  
28  
29 *Behav* 1983; 24: 385-96.  
30  
31  
32 25. Singh S, Graff LA, Bernstein CN. Do NSAIDs, antibiotics, infections, or stress trigger  
33  
34  
35 flares in IBD? *Am J Gastroenterol* 2009; 104: 1298-313.  
36  
37  
38 26. Yao T, Matsui T, Hiwatashi N. Crohn's disease in Japan: diagnostic criteria and  
39  
40  
41 epidemiology. *Dis Colon Rectum* 2000; 43: S85-93  
42  
43  
44 **27. Asakura K, Nishiwaki Y, Inoue N, et al. Prevalence of ulcerative colitis and Crohn's**  
45  
46  
47 **disease in Japan. *J Gastroenterol* 2009; 44: 659-65.**  
48  
49  
50 **28. Ishige T, Tomomasa T, Takebayashi T et al. Inflammatory bowel disease in children:**  
51  
52 **epidemiological analysis of the nationwide IBD registry in Japan. *J Gastroenterol***  
53  
54  
55 **2010; 45: 911-7.**  
56  
57  
58  
59  
60



**Life-event stress induced by the Great East Japan Earthquake was associated with relapse in ulcerative colitis but not Crohn's disease: a retrospective cohort study**

|                                 |                                                                                                                                                                                                                                                                                                                                                                                                                                                                                                                                                                                                                                                                                                                                                                                                                                                                                                                                                                                                                                                                                                                                                                                                                                                                                                                                                                                                                                                                                                                    |
|---------------------------------|--------------------------------------------------------------------------------------------------------------------------------------------------------------------------------------------------------------------------------------------------------------------------------------------------------------------------------------------------------------------------------------------------------------------------------------------------------------------------------------------------------------------------------------------------------------------------------------------------------------------------------------------------------------------------------------------------------------------------------------------------------------------------------------------------------------------------------------------------------------------------------------------------------------------------------------------------------------------------------------------------------------------------------------------------------------------------------------------------------------------------------------------------------------------------------------------------------------------------------------------------------------------------------------------------------------------------------------------------------------------------------------------------------------------------------------------------------------------------------------------------------------------|
| Journal:                        | <i>BMJ Open</i>                                                                                                                                                                                                                                                                                                                                                                                                                                                                                                                                                                                                                                                                                                                                                                                                                                                                                                                                                                                                                                                                                                                                                                                                                                                                                                                                                                                                                                                                                                    |
| Manuscript ID:                  | bmjopen-2012-002294.R2                                                                                                                                                                                                                                                                                                                                                                                                                                                                                                                                                                                                                                                                                                                                                                                                                                                                                                                                                                                                                                                                                                                                                                                                                                                                                                                                                                                                                                                                                             |
| Article Type:                   | Research                                                                                                                                                                                                                                                                                                                                                                                                                                                                                                                                                                                                                                                                                                                                                                                                                                                                                                                                                                                                                                                                                                                                                                                                                                                                                                                                                                                                                                                                                                           |
| Date Submitted by the Author:   | 29-Dec-2012                                                                                                                                                                                                                                                                                                                                                                                                                                                                                                                                                                                                                                                                                                                                                                                                                                                                                                                                                                                                                                                                                                                                                                                                                                                                                                                                                                                                                                                                                                        |
| Complete List of Authors:       | Shiga, Hisashi; Tohoku University Graduate School of Medicine, Division of Gastroenterology<br>Miyazawa, Teruko; Tohoku University Graduate School of Medicine, Division of Gastroenterology<br>Kinouchi, Yoshitaka; Tohoku University Graduate School of Medicine, Division of Gastroenterology<br>Takahashi, Seiichi; Tohoku University Graduate School of Medicine, Division of Gastroenterology<br>Tominaga, Gen; Japanese Red Cross Ishinomaki Hospital,<br>Takahashi, Hiroki; Sendai Medical Center,<br>Takagi, Sho; Takagi Clinic,<br>Obana, Nobuya; Osaki Citizen Hospital,<br>Kikuchi, Tatsuya; Sendai City Hospital,<br>Oomori, Shinya; Japanese Red Cross Sendai Hospital,<br>Nomura, Eiki; Miyagi Cancer Center,<br>Shiraki, Manabu; Iwate Prefectural Isawa Hospital,<br>Sato, Yuichirou; Osaki Citizen Hospital,<br>Takahashi, Shuichiro; Iwate Prefectural Chubu Hospital,<br>Umemura, Ken; South Miyagi Medical Center,<br>Yokoyama, Hiroshi; Iwate Prefectural Iwai Hospital,<br>Endo, Katsuya; Tohoku University Graduate School of Medicine, Division of Gastroenterology<br>Kakuta, Yoichi; Tohoku University Graduate School of Medicine, Division of Gastroenterology<br>Aizawa, Hiroki; Kesenuma City Hospital,<br>Matsuura, Masaki; Japanese Red Cross Ishinomaki Hospital,<br>Kimura, Tomoya; Iwate Prefectural Isawa Hospital,<br>Kuroha, Masatake; Iwate Prefectural Isawa Hospital,<br>Shimosegawa, Tooru; Tohoku University Graduate School of Medicine, Division of Gastroenterology |
| <b>Primary Subject Heading</b>: | Gastroenterology and hepatology                                                                                                                                                                                                                                                                                                                                                                                                                                                                                                                                                                                                                                                                                                                                                                                                                                                                                                                                                                                                                                                                                                                                                                                                                                                                                                                                                                                                                                                                                    |
| Secondary Subject Heading:      | Medical management, Mental health, Occupational and environmental medicine, Public health, Smoking and tobacco                                                                                                                                                                                                                                                                                                                                                                                                                                                                                                                                                                                                                                                                                                                                                                                                                                                                                                                                                                                                                                                                                                                                                                                                                                                                                                                                                                                                     |
| Keywords:                       | earthquake, ulcerative colitis, Crohn's disease, Inflammatory bowel disease < GASTROENTEROLOGY, relapse                                                                                                                                                                                                                                                                                                                                                                                                                                                                                                                                                                                                                                                                                                                                                                                                                                                                                                                                                                                                                                                                                                                                                                                                                                                                                                                                                                                                            |

1  
2  
3  
4  
5  
6  
7  
8  
9  
10  
11  
12  
13  
14  
15  
16  
17  
18  
19  
20  
21  
22  
23  
24  
25  
26  
27  
28  
29  
30  
31  
32  
33  
34  
35  
36  
37  
38  
39  
40  
41  
42  
43  
44  
45  
46  
47  
48  
49  
50  
51  
52  
53  
54  
55  
56  
57  
58  
59  
60



SCHOLARONE™  
Manuscripts

For peer review only

**Life-event stress induced by the Great East Japan Earthquake was associated with relapse in ulcerative colitis but not Crohn's disease: a retrospective cohort study**

**Short title: Relapse of Ulcerative colitis by the Great East Japan Earthquake**

Hisashi Shiga, MD, PhD<sup>1</sup>, Teruko Miyazawa, MD<sup>1</sup>, Yoshitaka Kinouchi, MD, PhD<sup>1</sup>, Seiichi Takahashi, MD, PhD<sup>1</sup>, Gen Tominaga, MD, PhD<sup>2</sup>, Hiroki Takahashi, MD, PhD<sup>3</sup>, Sho Takagi, MD, PhD<sup>4</sup>, Nobuya Obana, MD, PhD<sup>5</sup>, Tatsuya Kikuchi, MD, PhD<sup>6</sup>, Shinya Oomori, MD, PhD<sup>7</sup>, Eiki Nomura, MD, PhD<sup>8</sup>, Manabu Shiraki, MD, PhD<sup>9</sup>, Yuichirou Sato, MD, PhD<sup>5</sup>, Shuichiro Takahashi, MD, PhD<sup>10</sup>, Ken Umemura, MD<sup>11</sup>, Hiroshi Yokoyama, MD, PhD<sup>12</sup>, Katsuya Endo, MD, PhD<sup>1</sup>, Yoichi Kakuta, MD, PhD<sup>1</sup>, Hiroki Aizawa, MD, PhD<sup>13</sup>, Masaki Matsuura, MD, PhD<sup>2</sup>, Tomoya Kimura, MD, PhD<sup>9</sup>, Masatake Kuroha, MD, PhD<sup>9</sup>, Tooru Shimosegawa, MD, PhD, Professor<sup>1</sup>

<sup>1</sup> Division of Gastroenterology, Tohoku University Graduate School of Medicine, Sendai, JAPAN, <sup>2</sup> Japanese Red Cross Ishinomaki Hospital, Ishinomaki, JAPAN, <sup>3</sup> Sendai Medical Center, Sendai, JAPAN, <sup>4</sup> Takagi Clinic, Sendai, JAPAN, <sup>5</sup> Osaki Citizen Hospital, Osaki, JAPAN, <sup>6</sup> Sendai City Hospital, Sendai, JAPAN, <sup>7</sup> Japanese Red Cross Sendai Hospital, Sendai, JAPAN, <sup>8</sup> Miyagi Cancer Center, Natori, JAPAN, <sup>9</sup> Iwate Prefectural Isawa Hospital, Oshu, JAPAN, <sup>10</sup> Iwate Prefectural Chubu Hospital, Kitakami, JAPAN, <sup>11</sup> South Miyagi Medical

Center, Ogawara, JAPAN, <sup>12</sup> Iwate Prefectural Iwai Hospital, Ichinoseki, JAPAN, <sup>13</sup>

Kesenuma City Hospital, Kesenuma, JAPAN

Hisashi Shiga and Teruko Miyazawa contributed equally to this work.

Word count: 2,634 words (Abstract 296 words, Total 2,930 words)

Source of support: This study was not supported by grants from governmental agencies, private sources, or manufacturers of drugs or equipment.

Corresponding author

Hisashi Shiga

Division of Gastroenterology, Tohoku University Graduate School of Medicine,

1-1 Seiryō, Aoba, Sendai, 980-8574, Japan

Tel: +81 227177171, Fax: +81 227177177

*E-mail address:* [shiga@med.tohoku.ac.jp](mailto:shiga@med.tohoku.ac.jp)



**Abstract**

Objective: Stress is thought to be one of the triggers of relapses in patients with inflammatory bowel disease (IBD). We examined the rate of relapse in IBD patients before and after the Great East Japan Earthquake.

Design: A retrospective cohort study.

Settings: 13 hospitals in Japan.

Participants: 546 ulcerative colitis (UC) and 357 Crohn's disease (CD) patients who received outpatient and inpatient care at 13 hospitals located in the area that were seriously damaged by the earthquake. Data on patient's clinical characteristics, disease activity and deleterious effects of the earthquake were obtained from questionnaires and hospital records.

Primary outcome: We evaluated the relapse rate (from inactive to active) across two consecutive months before and two consecutive months after the earthquake, respectively. In this study, we defined "active" as conditions with a partial Mayo score = 2 or more (UC) or a Harvey-Bradshaw index = 6 or more (CD).

Results: Among the UC patients, disease was active in 167 patients and inactive in 379 patients before the earthquake. After the earthquake, the activity scores significantly increased ( $P < 0.0001$ ). A total of 86 patients relapsed (relapse rate = 15.8 %). The relapse rate was about twice that of the corresponding period in the previous year. Among the CD patients, 86 patients had

1  
2  
3  
4  
5  
6 active disease and 271 had inactive disease before the earthquake. After the earthquake, the

7  
8  
9 activity indices changed little. A total of 25 patients experienced relapse (relapse rate = 7.0 %).

10  
11  
12 The relapse rate did not differ from that of the corresponding period in the previous year.

13  
14  
15 Multivariate analyses revealed that UC, changes in dietary oral intake and anxiety about family

16  
17  
18 finances were associated with the relapse.

19  
20  
21 Conclusion: Life-event stress induced by the Great East Japan Earthquake was associated with

22  
23  
24 relapse in UC but not CD.

25  
26  
27 (296 words)

28  
29  
30  
31  
32 **Keywords**

33  
34  
35 earthquake, ulcerative colitis, Crohn's disease, relapse

## Article summary

### Article focus

Stress is thought to be one of the triggers of relapses in patients with inflammatory bowel disease (IBD); however, it would be unethical to impose stressful circumstances on IBD patients in order to examine their effects.

Disease onset or aggravation of cardiovascular disease, respiratory disease, peptic ulcer, etc. was reported to increase after the huge earthquake; however, there has been no report about relapses of IBD associated with the huge earthquake.

### Key messages

We examined the rate of relapse in IBD patients before and after a huge earthquake, the Great East Japan Earthquake of 11 March 2011 in Japan.

Life-event stress induced by the earthquake was associated with relapse of ulcerative colitis (UC) but not Crohn's disease.

This report suggests that we should take into account stress in the management of patients with IBD, especially those with UC.

### Strengths and limitations of this study

This is the first report that investigated the activities of a large number of IBD patients before and after a huge earthquake.

1  
2  
3  
4  
5  
6 We did not use validated scores that would objectively assess psychological stress, because it  
7  
8  
9 would be impossible to investigate stress several times before and after a devastating earthquake,  
10  
11  
12 given the usually unpredictable nature of earthquakes.

13  
14 Our study cannot exclude recall bias.  
15  
16  
17  
18  
19  
20  
21  
22  
23  
24  
25  
26  
27  
28  
29  
30  
31  
32  
33  
34  
35  
36  
37  
38  
39  
40  
41  
42  
43  
44  
45  
46  
47  
48  
49  
50  
51  
52  
53  
54  
55  
56  
57  
58  
59  
60

## Introduction

Inflammatory bowel disease (IBD) is a chronic remitting/relapsing disease. Although no variable has been proven to be a trigger of relapses in patients with IBD, stress has been described as one possibility.<sup>1 2 3 4 5 6 7 8</sup> On the other hand, some reports did not prove a relationship between psychological stress and exacerbations of IBD.<sup>9 10 11</sup> A prospective or well-established case-controlled study should be undertaken to determine whether stress is actually related to relapses of IBD; however, it would be unethical to impose stressful circumstances on IBD patients in order to examine their effects.

On 11 March 2011, Japan was hit by one of the most powerful earthquakes in recorded history, the Great East Japan Earthquake. The disaster left more than 28,000 people dead or missing, caused great damage or hardship in daily life, and also caused profound stress for all of the people, even those who did not suffer individual losses. It was surely one of the most stressful life events and might have contributed to relapses in IBD patients. In terms of earthquake-associated disease onset or aggravation, cardiovascular disease, respiratory disease, diabetes mellitus, hypertension and peptic ulcer were reported to increase after the huge earthquake.<sup>12 13 14 15 16 17</sup> However, there has been no report about relapses of IBD caused by the huge earthquake.

In this study, we examined the activities of IBD patients and their relapse and remission rates

1  
2  
3  
4  
5  
6  
7  
8  
9  
10  
11  
12  
13  
14  
15  
16  
17  
18  
19  
20  
21  
22  
23  
24  
25  
26  
27  
28  
29  
30  
31  
32  
33  
34  
35  
36  
37  
38  
39  
40  
41  
42  
43  
44  
45  
46  
47  
48  
49  
50  
51  
52  
53  
54  
55  
56  
57  
58  
59  
60

before and after the Great East Japan Earthquake. We also aimed to identify factors that were related to relapse or remission of IBD.

For peer review only

## Materials and methods

### Study subjects

Thirteen hospitals (Tohoku University Hospital, Japanese Red Cross Ishinomaki Hospital, Sendai Medical Center, Takagi Clinic, Osaki Citizen Hospital, Sendai City Hospital, Japanese Red Cross Sendai Hospital, Miyagi Cancer Center, South Miyagi Medical Center and Kesenuma City Hospital in Miyagi Prefecture; Iwate Prefectural Isawa Hospital, Iwate Prefectural Chubu Hospital, Iwate Prefectural Iwai Hospital in Iwate Prefecture) participated in this study. These hospitals are located in the area that was seriously damaged by the Great East Japan Earthquake. We sent a total of 1,080 questionnaires to ulcerative colitis (UC) and Crohn's disease (CD) patients who received care in these hospitals. Then we examined the hospital records for data on the patients who returned the questionnaires. Hospital data contained information such as gender, age, IBD duration, disease extent (total colitis, left-sided colitis and proctitis in UC), disease location (small intestine, colon and both in CD), extra-intestinal complications, use of medications, smoking status, and pregnancy experience. Written informed consent was obtained from all participants under the protocol approved by the Tohoku University Hospital Committee for Clinical Investigation.

To evaluate the degree of stress objectively, we also obtained data about each patient's situation regarding the earthquake, such as damage to the patient's house, duration of

1  
2  
3  
4  
5  
6 homelessness, deaths of family member or friends, changes in daily dietary intake,  
7  
8  
9 discontinuation or delay in taking medications, loss of job, family finances and changes in  
10  
11 smoking status. We divided housing damage into 4 groups according to the degree of damage to  
12  
13 the house; total loss ( $\geq 50\%$ ), half-loss ( $\geq 20\%$  but  $< 50\%$ ), partial loss ( $\geq 3\%$  but  $< 20\%$ ) and no  
14  
15 damage.  
16  
17  
18  
19

20 We evaluated the disease activity for two consecutive months before and two consecutive  
21  
22 months after the Great East Japan Earthquake using the Mayo score for UC <sup>18</sup> or  
23  
24 Harvey-Bradshaw index for CD <sup>19</sup>, depending on which was available in the hospital records  
25  
26 and questionnaires. The Mayo score is comprised of information on stool frequency, rectal  
27  
28 bleeding, findings on endoscopy and a physician's global assessment. Scores can range from 0  
29  
30 to 12. However, we used an abridged Mayo score (range from 0 to 9) that excluded findings on  
31  
32 endoscopy because routine endoscopic examinations were not performed so soon after the  
33  
34 earthquake. The Harvey-Bradshaw index is comprised of information on general condition,  
35  
36 abdominal pain, diarrhea frequency, abdominal mass and complications. Higher scores for both  
37  
38 the Mayo score and the Harvey-Bradshaw index indicate more severe disease activity. IBD  
39  
40 patients having a stoma were excluded because of difficulties in counting bowel movements.  
41  
42  
43  
44  
45  
46  
47  
48  
49  
50

51  
52 In this study, "active" was defined as follows: a partial Mayo score = 2 or more (UC) and a  
53  
54 Harvey-Bradshaw index = 6 or more (CD). Lower scores indicated inactive disease. We defined  
55  
56  
57  
58  
59  
60



1  
2  
3  
4  
5  
6 “relapse” as a change from inactive to active and “remission” as a change from active to  
7  
8  
9 inactive across the 2-months before and 2-months after the earthquake. The patients who  
10  
11  
12 remained active or inactive during the study period were considered to have “stable disease”.  
13  
14  
15 We compared the relapse and remission rates with those during the corresponding period in the  
16  
17  
18 previous year as controls.  
19  
20  
21  
22

### 23 **Statistical analysis**

24  
25  
26 Quantitative data are presented as mean  $\pm$  standard deviation (SD). Discrete variables are  
27  
28  
29 presented as median and range. All statistical analyses were performed using the JMP version 9  
30  
31  
32 (SAS Institute Inc., Cary, NC, USA). Differences between two groups were evaluated using  
33  
34  
35 chi-square test or Fisher’s exact probability test, unpaired t-test or Wilcoxon signed-rank test, as  
36  
37  
38 appropriate. A multiple logistic regression method that included all possible variables was used.  
39  
40  
41 The level of statistical significance was set at  $P < 0.05$ .  
42  
43  
44  
45  
46  
47  
48  
49  
50  
51  
52  
53  
54  
55  
56  
57  
58  
59  
60

## Results

### Patients' clinical characteristics

A total of 903 completed questionnaires (from 546 UC and 357 CD) were returned to us. The response rate to the questionnaire was 83.6% (903/1080). We examined the hospital records for each patient. Of the UC patients, 269 (49.3%) were males and 277 (50.7%) were females. The mean age was  $45.3 \pm 16.6$  years and the mean disease duration was  $9.7 \pm 9.0$  years. The extent of disease was as follows: 208 patients (38.1%), total colitis (over splenic flexure); 183 (33.5%), left-sided colitis (up to splenic flexure); and 83 (15.2%), proctitis (up to rectum). The extent was unknown in 72 patients (13.2%). Among the CD patients, there were 253 males (70.9%) and 104 females (29.1%). The mean age was  $37.1 \pm 12.5$  years and the mean disease duration was  $11.6 \pm 8.1$  years. The location of disease was as follows: 61 patients (17.1%), small intestine; 47 (13.2%), colon; and 212 (59.4%), both small intestine and colon. The location was unknown in 37 patients (10.3%) (Table 1).

Fifty-one UC (9.3%) and 43 CD (12.0%) patients experienced extra-intestinal complications. Of the UC patients, 55 patients (10.1%) were current smokers and 162 (29.7%) were past smokers. On the other hand, 85 CD patients (23.8%) were current smokers, and 74 (20.7%) were past smokers. Of 277 females with UC, 181 (65.3%) had experienced pregnancy, while only 41 of 104 CD females (39.4%) had experienced pregnancy. Five UC patients and 3 CD

1  
2  
3  
4  
5  
6 patients were pregnant when the earthquake occurred (Table 1). Medications used by the IBD  
7  
8  
9 patients before the earthquake are shown in Table 2.

### 14 15 **Deleterious effects of the earthquake**

16  
17 Of the 903 IBD patients, the houses of 501 patients (55.5%) were damaged; partial loss was  
18  
19 experienced by 369 patients (40.9%), half-loss by 58 (6.4%), and total loss by 74 (8.2%). As a  
20  
21 result, 62 (6.9%) patients had to stay in refuge facilities for one week or more. A total of 175  
22  
23 patients (19.4%) experienced the death of a family member or a friend (Table 3).

24  
25  
26 Only 51 patients (5.7%) experienced complete loss of their jobs after the earthquake.  
27  
28  
29 However, 279 (30.9%) and 157 (17.4%) patients reported short-term (for the next several  
30  
31 months) and long-term (for the next several years) anxiety about their family finances,  
32  
33 respectively (Table 3).  
34  
35  
36  
37  
38  
39

40  
41 Because of temporary homelessness and difficulty in obtaining various types of food, changes  
42  
43 in daily intake such as fat, vegetables, fruits, etc. were experienced by 269 patients (29.8%) after  
44  
45 the earthquake. With regard to medications, 69 patients (11.7%) interrupted medications for a  
46  
47 week or more because they had lost their medicines or could not consult with doctors (see Table  
48  
49  
50  
51  
52 3).  
53  
54  
55  
56  
57  
58  
59  
60

### Changes in disease activity before and after the earthquake

Of the UC patients, disease was active in 167 patients (30.6%) and inactive in 379 patients (69.4%) before the earthquake. After the earthquake, the activity scores significantly increased ( $P < 0.0001$ ). A total of 86 patients relapsed and the disease status became inactive in 22 patients; therefore, the relapse rate (from inactive to active) was 15.8% (86/546) and the remission rate (from active to inactive) was 4.0% (22/546). The relapse rate was significantly higher than in the previous year (8.8%, data not shown). On the other hand, the remission rate was significantly lower than in the previous year (8.8%, data not shown).

Of the CD patients, 86 patients (24.1%) had active disease and 271 patients (75.9%) had inactive disease before the earthquake. After the earthquake, the activity indices were little changed. A total of 25 patients relapsed and the disease status became inactive in 16 patients; therefore, the relapse rate (from inactive to active) was 7.0% (25/357) and the remission rate (from active to inactive) was 4.5% (16/357). Unlike UC, the relapse rate among CD patients was slightly higher than in the previous year (5.3%, data not shown), but not significantly. On the other hand, the remission rate was twice that of the previous year (2.2%, data not shown), but did not differ significantly.

Because of relapses, 96 patients (10.6%) required additional medication after the earthquake as follows: prednisolone (27 patients), tacrolimus (3), azathioprine (11), infliximab (13),

1  
2  
3  
4  
5  
6 adalimumab (6), total parenteral nutrition (4), or others.  
7  
8  
9

### 10 11 12 **Possible variables for relapse or remission** 13

14  
15 There were no differences in the patients' clinical characteristics between the relapse group  
16  
17 and non-relapse group. With regard to remission, there were also no differences in the patients'  
18  
19 clinical characteristics between the remission group and non-remission group.  
20  
21

22  
23 Multivariate analyses revealed that UC, changes in oral intake and anxiety about family  
24  
25 finances were independent predictors of relapse with an adjusted odds ratio (OR) of 2.86 (95%  
26  
27 confidence interval (CI), 1.73 to 4.87), 1.83 (1.16 to 2.88) and 1.69 (1.05 to 2.70), respectively  
28  
29  
30 (Table 4). On the other hand, no factor was identified as an independent predictor of remission  
31  
32  
33 (Table 5).  
34  
35  
36  
37  
38  
39  
40  
41  
42  
43  
44  
45  
46  
47  
48  
49  
50  
51  
52  
53  
54  
55  
56  
57  
58  
59  
60

## Discussion

Of the 903 IBD patients, 132 patients (14.6%) had experienced damage to their homes of half or more and 175 patients (19.4%) experienced the death of a family member or friend. These factors would suggest that the Great East Japan Earthquake was likely one of the most stressful life events for those affected. The response rate to the questionnaire (83.6%) was satisfactory. However, the damage caused by the earthquake might have been more serious, because the non-response group might have included patients who took refuge somewhere or died. The present study showed that life-event stress induced by the Great East Japan Earthquake was associated with relapse of UC but not CD. This is the first report that investigated the activities of a large number of IBD patients before and after a huge earthquake.

As for the patient's clinical characteristics, gender, age, IBD duration, extra-intestinal complications and smoking status did not influence the incidence of relapses, with the exception of IBD type (UC or CD). As mentioned above, there have been many reports that psychological stress may induce flares of UC.<sup>1 2 3 4 5 6 8</sup> On the other hand, there have been few reports about relapses of CD.<sup>4 7 8</sup> Our present study demonstrated that psychological stress was associated with relapse in UC but not CD. In terms of damage and other deleterious effects from the earthquake, damage to houses, duration of temporary homelessness, death of family members or friends and unemployment were not associated with relapses of IBD; however, anxiety about

1  
2  
3  
4  
5  
6 family finances was related to relapse. These results may suggest that psychological stress or  
7  
8  
9 uneasiness about the future has a greater effect on UC relapses than direct damage and losses.  
10

11  
12 Although the discontinuation of medication had no influence on relapses of IBD, changes in  
13  
14 daily dietary intake did. A relationship between dietary factors and the onset or relapses of IBD  
15  
16 has been reported.<sup>20 21 22</sup> After the earthquake, many patients could not obtain enough fresh  
17  
18 food; therefore, they consumed more processed foods and fewer fresh vegetables and fruits.  
19  
20

21  
22 With regard to possible variables related to remission, we expected that a decrease in the total  
23  
24 volume or in fatty foods would be associated with remission, especially in CD patients.  
25  
26

27  
28 However, our results did not support this hypothesis. This may have been because the period of  
29  
30 dietary restriction was not so long. There were few patients that changed their smoking status  
31  
32 after the earthquake; therefore, we could not include this factor in multivariate analyses.  
33  
34

35  
36 However, changes in smoking status may have been an important factor in relapses of UC, but  
37  
38 not CD. Of the 9 UC patients who stopped smoking after the earthquake, 7 experienced relapses  
39  
40 ( $P = 0.002$ ). Beaugerie et al. reported that among smokers with UC who stopped smoking, the  
41  
42 disease severity increased after cessation.<sup>23</sup> Over the short term, smoking itself did not appear  
43  
44 to influence relapse or remission; however, changes in smoking status were associated with  
45  
46 relapse in UC.  
47  
48  
49  
50  
51  
52  
53

54  
55 Our study had some limitations. First, we did not use validated scores that could objectively  
56  
57

1  
2  
3  
4  
5  
6 assess psychological stress such as the Cohen Perceived Stress Scale.<sup>24</sup> Since huge earthquakes  
7  
8 usually happen without warning, it is impossible to investigate stress several times before and  
9  
10 after an earthquake. Therefore, we assessed the degree of stress by examining information about  
11  
12 damage and changes in life style after the Great East Japan Earthquake. Second, our study  
13  
14 cannot exclude recall bias. It was difficult to administer a questionnaire immediately after the  
15  
16 earthquake, which is why we obtained data about clinical characteristics and activities from both  
17  
18 questionnaires and medical records. Third, non-steroidal anti-inflammatory drugs (NSAIDs) and  
19  
20 antibiotics may contribute to relapses of IBD.<sup>25</sup> However, we think the numbers of newly  
21  
22 prescribed NSAIDs and antibiotics during the study period were less than or equal to those of  
23  
24 the corresponding period in the previous year. Because of the difficulty in obtaining medicine  
25  
26 after an earthquake, the numbers of newly prescribed NSAIDs and antibiotics might have  
27  
28 decreased. In addition, unlike in the case of UC patients, twice as many males as females were  
29  
30 CD patients, which is in agreement with previous reports in Japan.<sup>26 27 28</sup> More CD patients  
31  
32 were current smokers than those with UC, in agreement with previous reports.<sup>8 20</sup>  
33  
34  
35  
36  
37  
38  
39  
40  
41  
42  
43  
44  
45

46 Life-event stress induced by the Great East Japan Earthquake was related to relapses in UC  
47  
48 but not CD. We hope that this report will be useful to the management of patients with IBD, not  
49  
50 only during catastrophic events but also generally. For the future, a prospective study should be  
51  
52 undertaken to determine whether stress is actually related to relapses of IBD.  
53  
54  
55  
56  
57  
58  
59  
60



### Contributorship statement

Hisashi Shiga and Teruko Miyazawa had the original idea for this study and were involved in writing the original study protocol, data collection and writing manuscript.

Gen Tominaga, Hiroki Takahashi, Sho Takagi, Nobuya Obana, Tatsuya Kikuchi, Shinya

Oomori, Eiki Nomura, Manabu Shiraki, Yuichirou Sato, Shuichiro Takahashi, Ken Umemura,

Hiroshi Yokoyama, Katsuya Endo, Yoichi Kakuta, Hiroki Aizawa, Masaki Matsuura, Tomoya

Kimura and Masatake Kuroha were involved in data collection and contributed to discussions.

Yoshitaka Kinouchi, Seiichi Takahashi and Tooru Shimosegawa contributed to discussions and reviewed the manuscript.

All authors had full access to all of the data in this study and can take responsibility for the integrity of the data and the accuracy of the data analysis.

### Funding

This study was not supported by grants from governmental agencies, private sources, or manufacturers of drugs or equipment. This study was performed within the health insurance treatment.

### Declaration of interest

All authors have completed the Unified Competing Interest form at

1  
2  
3  
4  
5  
6 [www.icmje.org/coi\\_disclosure.pdf](http://www.icmje.org/coi_disclosure.pdf) (available on request from the corresponding author) and  
7  
8  
9 declare that (1) there was no support from any organisations for the submitted work; (2) no  
10  
11 financial relationships with any organisations that might have an interest in the submitted work  
12  
13 in the previous 3 years; (3) no other relationships or activities that could appear to have  
14  
15 influenced the submitted work.  
16  
17  
18  
19

### 20 **Ethical approval**

21  
22  
23 This study was approved by the Tohoku University Hospital Committee for Clinical  
24  
25  
26 Investigation. Data are presented in aggregate and no personal health information is disclosed.  
27  
28

### 29 **Data sharing**

30  
31  
32 No additional data available.  
33  
34  
35  
36  
37  
38  
39  
40  
41  
42  
43  
44  
45  
46  
47  
48  
49  
50  
51  
52  
53  
54  
55  
56  
57  
58  
59  
60

## References

1. Mawdsley JE, Rampton DS. Psychological stress in IBD: new insights into pathogenic and therapeutic implications. *Gut* 2005; 54: 1481–91.
2. Levenstein S, Prantera C, Varvo V, et al. Stress and exacerbation in ulcerative colitis: A prospective study of patients enrolled in remission. *Am J Gastroenterol* 2000; 95: 1213–20.
3. Bitton A, Sewitch MJ, Peppercorn MA, et al. Psychosocial determinants of relapse in ulcerative colitis: a longitudinal study. *Am J Gastroenterol* 2003; 98: 2203–8.
4. Mittermaier C, Dejaco C, Waldhoer T, et al. Impact of depressive mood on relapse in patients with inflammatory bowel disease: a prospective 18-month follow-up study. *Psychosom Med* 2004; 66: 79-84.
5. Mawdsley JE, Macey MG, Feakins RM, et al. The effect of acute psychologic stress on systemic and rectal mucosal measures of inflammation in ulcerative colitis. *Gastroenterology* 2006; 131: 410-9.
6. Maunder RG, Greenberg GR, Nolan RP, et al. Autonomic response to standardized stress predicts subsequent disease activity in ulcerative colitis. *Eur J Gastroenterol Hepatol* 2006; 18: 413–420.
7. Bitton A, Dobkin P, Edwardes MD, et al. Predicting relapse in Crohn’s disease: a biopsychosocial model. *Gut* 2008; 57: 1386–92.

- 1  
2  
3  
4  
5  
6 8. Bernstein CN, Singh S, Graff LA, et al. A prospective population-based study of triggers of  
7  
8  
9 symptomatic flares in IBD. *Am J Gastroenterol* 2010; 105: 1994–2002.
- 10  
11  
12 9. North CS, Alpers DH, Helzer JE, et al. Do life events or depression exacerbate  
13  
14 inflammatory bowel disease? A prospective study. *Ann Intern Med* 1991; 114: 381–386.
- 15  
16  
17  
18 10. Vidal A, Gomez-Gil E, Sans M, et al. Life events and inflammatory bowel disease relapse:  
19  
20 a prospective study of patients enrolled in remission. *Am J Gastroenterol* 2006; 101: 775–  
21  
22 781.
- 23  
24  
25  
26 11. Mikocka-Walus AA, Turnbull DA, Moulding NT, et al. Does psychological status  
27  
28 influence clinical outcomes in patients with inflammatory bowel disease (IBD) and other  
29  
30 chronic gastroenterological diseases: an observational cohort prospective study.  
31  
32  
33 *Biopsychosoc Med* 2008; 2: 11-19.
- 34  
35  
36  
37 12. Takakura R, Himeno S, Kanayama Y, et al. Follow-up after the Hanshin-Awaji earthquake:  
38  
39 diverse influences on pneumonia, bronchial asthma, peptic ulcer and diabetes mellitus.  
40  
41  
42  
43  
44 *Intern Med* 1997; 36: 87-91.
- 45  
46  
47 13. Matsuoka T, Yoshioka T, Oda J, et al. The impact of a catastrophic earthquake on  
48  
49 morbidity rates for various illnesses. *Public Health* 2000; 114: 249-53.
- 50  
51  
52  
53 14. Aoyama N, Kinoshita Y, Fujimoto S, et al. Peptic ulcers after the Hanshin-Awaji  
54  
55 earthquake: increased incidence of bleeding gastric ulcers. *Am J Gastroenterol* 1998; 93:  
56  
57

- 1  
2  
3  
4  
5  
6 311-6.  
7  
8  
9 15. Aoki T, Fukumoto Y, Yasuda S, et al. The Great East Japan Earthquake Disaster and  
10  
11 cardiovascular diseases. *Eur Heart J* 2012 Aug 28 [Epub ahead of print].  
12  
13  
14 16. Ogawa S, Ishiki M, Nako K, et al. Effects of the Great East Japan Earthquake and huge  
15  
16 tsunami on glycaemic control and blood pressure in patients with diabetes mellitus. *BMJ*  
17  
18 *Open* 2012; 2: e000830.  
19  
20  
21  
22  
23 17. Aoyagi T, Yamada M, Kunishima H, et al. Characteristics of infectious diseases in  
24  
25 hospitalized patients during the early phase after the 2011 Great East Japan earthquake:  
26  
27 pneumonia as a significant reason for hospital care. *Chest* 2012 Aug 13 [Epub ahead of  
28  
29 print].  
30  
31  
32  
33  
34 18. Schroeder KW, Tremaine WJ, Ilstrup DM. Coated oral 5-aminosalicylic acid therapy for  
35  
36 mildly to moderately active ulcerative colitis. A randomized study. *N Engl J Med* 1987;  
37  
38 317: 1625-9.  
39  
40  
41  
42  
43 19. Harvey RF, Bradshaw JM. A simple index of Crohn's-disease activity. *Lancet* 1980; 1:  
44  
45 514.  
46  
47  
48  
49 20. Thornton JR, Emmett PM, Heaton KW. Smoking, sugar, and inflammatory bowel disease.  
50  
51 *Br Med J*. 1985; 290: 1786-7.  
52  
53  
54  
55 21. Jowett SL, Seal CJ, Pearce MS, et al. Influence of dietary factors on the clinical course of  
56  
57  
58  
59  
60

- 1  
2  
3  
4  
5  
6 ulcerative colitis: a prospective cohort study. *Gut* 2004; 53: 1479-84.  
7  
8  
9 22. Jantchou P, Morois S, Clavel-Chapelon F, et al. Animal protein intake and risk of  
10  
11 inflammatory bowel disease: The E3N prospective study. *Am J Gastroenterol* 2010; 105:  
12  
13 2195-201.  
14  
15  
16  
17 23. Beaugerie L, Massot N, Carbonnel F, et al. Impact of cessation of smoking on the course of  
18  
19 ulcerative colitis. *Am J Gastroenterol*. 2001; 96: 2113-6.  
20  
21  
22  
23 24. Cohen S, Kamarck T, Mermelstein R. A global measure of perceived stress. *J Health Soc*  
24  
25  
26  
27 Behav 1983; 24: 385-96.  
28  
29  
30 25. Singh S, Graff LA, Bernstein CN. Do NSAIDs, antibiotics, infections, or stress trigger  
31  
32 flares in IBD? *Am J Gastroenterol* 2009; 104: 1298-313.  
33  
34  
35 26. Yao T, Matsui T, Hiwatashi N. Crohn's disease in Japan: diagnostic criteria and  
36  
37 epidemiology. *Dis Colon Rectum* 2000; 43: S85-93  
38  
39  
40  
41 27. Asakura K, Nishiwaki Y, Inoue N, et al. Prevalence of ulcerative colitis and Crohn's  
42  
43 disease in Japan. *J Gastroenterol* 2009; 44: 659-65.  
44  
45  
46  
47 28. Ishige T, Tomomasa T, Takebayashi T et al. Inflammatory bowel disease in children:  
48  
49 epidemiological analysis of the nationwide IBD registry in Japan. *J Gastroenterol* 2010; 45:  
50  
51 911-7.  
52  
53  
54  
55  
56  
57  
58  
59  
60

Table 1. Patients' clinical characteristics.

|                                |      | Ulcerative<br>colitis | Crohn's<br>disease | Total       |
|--------------------------------|------|-----------------------|--------------------|-------------|
| Number of patients             |      | 546                   | 357                | 903         |
| Gender                         |      |                       |                    |             |
| Male                           |      | 269 (49.3%)           | 253 (70.9%)        | 522 (57.8%) |
| Female                         |      | 277 (50.7%)           | 104 (29.1%)        | 381 (42.2%) |
| Age                            | year | 45.3 ± 16.6           | 37.1 ± 12.5        | 42.0 ± 15.6 |
| Disease duration               | year | 9.7 ± 9.0             | 11.6 ± 8.1         | 10.5 ± 8.7  |
| Disease extent                 |      |                       |                    |             |
| Total colitis                  |      | 208 (38.1%)           | -                  |             |
| Left-sided colitis             |      | 183 (33.5%)           | -                  |             |
| Proctitis                      |      | 83 (15.2%)            | -                  |             |
| Unknown                        |      | 72 (13.2%)            | -                  |             |
| Disease location               |      |                       |                    |             |
| Small intestine                |      | -                     | 61 (17.1%)         |             |
| Colon                          |      | -                     | 212 (59.4%)        |             |
| Small intestine and colon      |      | -                     | 47 (13.2%)         |             |
| Unknown                        |      | -                     | 37 (10.3%)         |             |
| Extra-intestinal complications |      |                       |                    |             |
| Positive                       |      | 51 (9.3%)             | 43 (12.0%)         | 94 (10.4%)  |
| None                           |      | 495 (90.7%)           | 314 (88.0%)        | 809 (89.6%) |
| Smoking status                 |      |                       |                    |             |
| Current smokers                |      | 55 (10.1%)            | 85 (23.8%)         | 140 (15.5%) |
| Past smokers                   |      | 162 (29.7%)           | 74 (20.7%)         | 236 (26.1%) |
| None                           |      | 327 (59.9%)           | 198 (55.5%)        | 525 (58.2%) |
| Unclear                        |      | 2 (0.3%)              | 0 (0.0%)           | 2 (0.2%)    |
| Pregnancy experience           |      |                       |                    |             |
| Positive                       |      | 181/277               | 41/104             | 222/381     |
| (During the earthquake)        |      | (5)                   | (3)                | (8)         |

Table 2. Use of the medications before the Great East Japan Earthquake.

|               | Ulcerative<br>colitis<br>(N=546) | Crohn's<br>disease<br>(N=357) | Total<br>(N=903) |
|---------------|----------------------------------|-------------------------------|------------------|
| 5-ASA or SASP | 486 (89.0%)                      | 276 (77.3%)                   | 762 (84.4%)      |
| PSL           | 79 (9.0%)                        | 26 (7.3%)                     | 105 (11.6%)      |
| (mg)          | (1-60)                           | (1-40)                        |                  |
| AZA or 6-MP   | 56 (10.3%)                       | 55 (15.4%)                    | 111 (12.3%)      |
| (mg)          | (15-100)                         | (10-100)                      |                  |
| Tacrolimus    | 4 (0.7%)                         | -                             | 4 (0.4%)         |
| IFX           | 18 (3.3%)                        | 151 (42.3%)                   | 169 (18.7%)      |
| (mg)          | (200-500)                        | (150-500)                     |                  |
| ADA           | -                                | 11 (3.1%)                     | 11 (1.2%)        |
| TPN           | 0 (0.0%)                         | 3 (0.8%)                      | 3 (0.3%)         |
| ED            |                                  | 70 (19.6%)                    | 70 (7.8%)        |
| (kcal/day)    |                                  | (300-1,800)                   |                  |
| CAP           | 3 (0.5%)                         | 1 (0.3%)                      | 4 (0.4%)         |

5-ASA, aminosalicilic acid; SASP, salazosurufapirizine; PSL, prednisolone; AZA, azathioprine; MP, mercaptopurine; IFX, infliximab; ADA, adalimumab; TPN, total parenteral nutrition; ED, elemental diet; CAP, cytoapheresis.



Table 3. Damage and deleterious effects of the Great East Japan Earthquake.

|                                           | Ulcerative<br>colitis<br>(N=546) | Crohn's<br>disease<br>(N=357) | Total<br>(N=903) |
|-------------------------------------------|----------------------------------|-------------------------------|------------------|
| <b>Damage to houses</b>                   |                                  |                               |                  |
| Total loss ( $\geq 50\%$ )                | 36 (6.6%)                        | 38 (10.6%)                    | 74 (8.2%)        |
| Half-loss ( $\geq 20\%$ but $< 50\%$ )    | 37 (6.8%)                        | 21 (5.9%)                     | 58 (6.4%)        |
| Partial loss ( $\geq 3\%$ but $< 20\%$ )  | 236 (43.2%)                      | 133 (37.3%)                   | 369 (40.9%)      |
| None                                      | 233 (42.7%)                      | 161 (45.1%)                   | 394 (43.6%)      |
| Unclear                                   | 4 (0.7%)                         | 4 (1.1%)                      | 8 (0.9%)         |
| <b>Temporary homelessness</b>             |                                  |                               |                  |
| 1 week or more                            | 37 (6.8%)                        | 25 (7.0%)                     | 62 (6.9%)        |
| Less than 1 week or none                  | 503 (92.1%)                      | 331 (92.7%)                   | 834 (92.3%)      |
| Unclear                                   | 6 (1.1%)                         | 1 (0.3%)                      | 7 (0.8%)         |
| <b>Death of family members or friends</b> |                                  |                               |                  |
| Yes                                       | 106 (19.4%)                      | 69 (19.3%)                    | 175 (19.4%)      |
| None                                      | 435 (79.7%)                      | 284 (79.6%)                   | 719 (79.6%)      |
| Unclear                                   | 5 (0.9%)                         | 4 (1.1%)                      | 9 (1.0%)         |
| <b>Changes in daily dietary intake</b>    |                                  |                               |                  |
| Yes                                       | 153 (28.0%)                      | 116 (32.5%)                   | 269 (29.8%)      |
| No                                        | 387 (70.9%)                      | 239 (66.9%)                   | 626 (69.3%)      |
| Unclear                                   | 6 (1.1%)                         | 2 (0.6%)                      | 8 (0.9%)         |
| <b>Discontinuation of medications</b>     |                                  |                               |                  |
| 1 week or more                            | 39 (9.8%)                        | 30 (14.1%)                    | 69 (11.7%)       |
| None                                      | 507 (9.8%)                       | 327 (14.1%)                   | 834 (11.7%)      |
| Unclear                                   | 358 (90.2%)                      | 256 (85.9%)                   | 614 (88.3%)      |
| <b>Interruption in IFX or ADA</b>         |                                  |                               |                  |
| Yes                                       | 1/18                             | 19/162                        | 20/180           |
| <b>Complete loss of job</b>               |                                  |                               |                  |
| Yes                                       | 26 (4.8%)                        | 25 (7.0%)                     | 51 (5.7%)        |
| None                                      | 518 (94.9%)                      | 330 (92.4%)                   | 848 (93.9%)      |
| Unclear                                   | 2 (0.3%)                         | 2 (5.6%)                      | 4 (0.4%)         |
| <b>Anxiety about family finances</b>      |                                  |                               |                  |
| Yes                                       | 167 (30.6%)                      | 145 (40.6%)                   | 312 (34.6%)      |

|                                |             |             |             |
|--------------------------------|-------------|-------------|-------------|
| (Short-term anxiety)*          | (147)       | (132)       | (279)       |
| (Long-term anxiety)*           | (83)        | (74)        | (157)       |
| None                           | 376 (68.9%) | 211 (59.1%) | 587 (65.0%) |
| Unclear                        | 3 (0.5%)    | 1 (0.3%)    | 4 (0.4%)    |
| Changes in smoking status      |             |             |             |
| Stopped after the earthquake   | 9           | 5           | 14          |
| Restarted after the earthquake | 10          | 5           | 15          |

IFX, infliximab; ADA, Adalimumab. \* Short-term anxiety indicates anxiety about their family finances for the next several months. Long-term anxiety indicates anxiety about their family finances several years or more in the future.

Table 4. Possible variables for relapse after the Great East Japan Earthquake.

|                                            |     | Odds ratio | <i>P</i> value | 95% CI |      |
|--------------------------------------------|-----|------------|----------------|--------|------|
| <b>IBD type</b>                            |     |            |                |        |      |
| Ulcerative colitis                         | 546 | 2.86       | < 0.0001       | 1.73   | 4.87 |
| Crohn's disease                            | 357 | 1          |                |        |      |
| <b>Gender</b>                              |     |            |                |        |      |
| Male                                       | 522 | 0.78       | 0.26           | 0.50   | 1.20 |
| Female                                     | 381 | 1          |                |        |      |
| <b>Age*</b>                                |     |            |                |        |      |
| More than 40 years                         | 423 | 0.72       | 0.16           | 0.45   | 1.14 |
| 40 or less                                 | 479 | 1          |                |        |      |
| <b>Disease duration</b>                    |     |            |                |        |      |
| More than 10 years                         | 350 | 0.94       | 0.80           | 0.58   | 1.50 |
| 10 or less                                 | 553 | 1          |                |        |      |
| <b>Extra-intestinal complications</b>      |     |            |                |        |      |
| Positive                                   | 94  | 1.40       | 0.32           | 0.71   | 2.59 |
| None                                       | 809 | 1          |                |        |      |
| <b>Smoking status*</b>                     |     |            |                |        |      |
| Current smokers                            | 140 | 0.95       | 0.88           | 0.48   | 1.76 |
| Others                                     | 761 | 1          |                |        |      |
| <b>Damage to houses*</b>                   |     |            |                |        |      |
| Total or half loss                         | 132 | 1.01       | 0.97           | 0.52   | 1.88 |
| Others                                     | 763 | 1          |                |        |      |
| <b>Temporary homelessness*</b>             |     |            |                |        |      |
| 1 week or more                             | 62  | 0.97       | 0.94           | 0.41   | 2.14 |
| Others                                     | 834 | 1          |                |        |      |
| <b>Death of family members or friends*</b> |     |            |                |        |      |
| Yes                                        | 175 | 1.20       | 0.50           | 0.70   | 2.03 |
| None                                       | 719 | 1          |                |        |      |
| <b>Complete loss of job*</b>               |     |            |                |        |      |
| Yes                                        | 51  | 1.55       | 0.31           | 0.65   | 3.47 |
| None                                       | 848 | 1          |                |        |      |
| <b>Anxiety about family finances*</b>      |     |            |                |        |      |

|                                  |     |      |        |      |      |
|----------------------------------|-----|------|--------|------|------|
| Yes                              | 312 | 1.69 | 0.03   | 1.05 | 2.70 |
| None                             | 587 | 1    |        |      |      |
| Changes in daily dietary intake* |     |      |        |      |      |
| Yes                              | 269 | 1.83 | < 0.01 | 1.16 | 2.88 |
| None                             | 626 | 1    |        |      |      |
| Discontinuation of medications   |     |      |        |      |      |
| 1 week or more                   | 69  | 1.49 | 0.30   | 0.69 | 2.98 |
| None                             | 834 | 1    |        |      |      |

CI, Confidence interval. \* Information on several patients about age, smoking status, damage to houses, temporarily homelessness, death of family members or friends, complete loss of job, anxiety about family finances, and changes in daily dietary intake was not available.

Table 5. Possible variables for remission after the Great East Japan Earthquake.

|                                            |     | Odds ratio | <i>P</i> value | 95% CI |      |
|--------------------------------------------|-----|------------|----------------|--------|------|
| <b>IBD type</b>                            |     |            |                |        |      |
| Ulcerative colitis                         | 546 | 0.81       | 0.58           | 0.39   | 1.72 |
| Crohn's disease                            | 357 | 1          |                |        |      |
| <b>Gender</b>                              |     |            |                |        |      |
| Male                                       | 522 | 0.84       | 0.62           | 0.41   | 1.72 |
| Female                                     | 381 | 1          |                |        |      |
| <b>Age*</b>                                |     |            |                |        |      |
| More than 40 years                         | 423 | 0.89       | 0.76           | 0.41   | 1.88 |
| 40 or less                                 | 479 | 1          |                |        |      |
| <b>Disease duration</b>                    |     |            |                |        |      |
| More than 10 years                         | 350 | 0.63       | 0.25           | 0.27   | 1.37 |
| 10 or less                                 | 553 | 1          |                |        |      |
| <b>Extra-intestinal complications</b>      |     |            |                |        |      |
| Positive                                   | 94  | 0.80       | 0.71           | 0.19   | 2.33 |
| None                                       | 809 | 1          |                |        |      |
| <b>Smoking status*</b>                     |     |            |                |        |      |
| Current smokers                            | 140 | 0.70       | 0.52           | 0.20   | 1.90 |
| Others                                     | 761 | 1          |                |        |      |
| <b>Damage to houses*</b>                   |     |            |                |        |      |
| Total or half loss                         | 132 | 1.07       | 0.90           | 0.33   | 2.86 |
| Others                                     | 763 | 1          |                |        |      |
| <b>Temporary homelessness*</b>             |     |            |                |        |      |
| 1 week or more                             | 62  | 0.82       | 0.81           | 0.12   | 3.40 |
| Others                                     | 834 | 1          |                |        |      |
| <b>Death of family members or friends*</b> |     |            |                |        |      |
| Yes                                        | 175 | 0.58       | 0.28           | 0.18   | 1.51 |
| None                                       | 719 | 1          |                |        |      |
| <b>Complete loss of job*</b>               |     |            |                |        |      |
| Yes                                        | 51  | 2.23       | 0.28           | 0.47   | 7.87 |
| None                                       | 848 | 1          |                |        |      |
| <b>Anxiety about family finances*</b>      |     |            |                |        |      |

|                                  |     |      |      |      |      |
|----------------------------------|-----|------|------|------|------|
| Yes                              | 312 | 1.06 | 0.89 | 0.47 | 2.26 |
| None                             | 587 | 1    |      |      |      |
| Changes in daily dietary intake* |     |      |      |      |      |
| Yes                              | 269 | 1.26 | 0.55 | 0.58 | 2.62 |
| None                             | 626 | 1    |      |      |      |
| Discontinuation of medications   |     |      |      |      |      |
| 1 week or more                   | 69  | 0.36 | 0.26 | 0.02 | 1.80 |
| None                             | 834 | 1    |      |      |      |

CI, Confidence interval. \* Information on several patients about age, smoking status, damage to houses, temporarily homelessness, death of family members or friends, complete loss of job, anxiety about family finances, and changes in daily dietary intake was not available.

1  
2  
3  
4  
5  
6 **Original research article: Life-event stress induced by the Great East Japan**

7  
8  
9 **Earthquake **was associated with** relapse in ulcerative colitis but not Crohn's**

10  
11  
12 **disease: a retrospective cohort study**

13  
14  
15 **Short title: Relapse of Ulcerative colitis by the Great East Japan Earthquake**

16  
17  
18  
19  
20  
21 Hisashi Shiga, MD, PhD <sup>1</sup>, Teruko Miyazawa, MD <sup>1</sup>, Yoshitaka Kinouchi, MD, PhD <sup>1</sup>, Seiichi

22  
23  
24 Takahashi, MD, PhD <sup>1</sup>, Gen Tominaga, MD, PhD <sup>2</sup>, Hiroki Takahashi, MD, PhD <sup>3</sup>, Sho Takagi,

25  
26  
27 MD, PhD <sup>4</sup>, Nobuya Obana, MD, PhD <sup>5</sup>, Tatsuya Kikuchi, MD, PhD <sup>6</sup>, Shinya Oomori, MD,

28  
29  
30 PhD <sup>7</sup>, Eiki Nomura, MD, PhD <sup>8</sup>, Manabu Shiraki, MD, PhD <sup>9</sup>, Yuichirou Sato, MD, PhD <sup>5</sup>,

31  
32  
33 Shuichiro Takahashi, MD, PhD <sup>10</sup>, Ken Umemura, MD <sup>11</sup>, Hiroshi Yokoyama, MD, PhD <sup>12</sup>,

34  
35  
36 Katsuya Endo, MD, PhD <sup>1</sup>, Yoichi Kakuta, MD, PhD <sup>1</sup>, Hiroki Aizawa, MD, PhD <sup>13</sup>, Masaki

37  
38  
39 Matsuura, MD, PhD <sup>2</sup>, Tomoya Kimura, MD, PhD <sup>9</sup>, Masatake Kuroha, MD, PhD <sup>9</sup>, Tooru

40  
41  
42 Shimosegawa, MD, PhD, Professor <sup>1</sup>

43  
44  
45 <sup>1</sup> Division of Gastroenterology, Tohoku University Graduate School of Medicine, Sendai,

46  
47  
48 JAPAN, <sup>2</sup> Japanese Red Cross Ishinomaki Hospital, Ishinomaki, JAPAN, <sup>3</sup> Sendai Medical

49  
50  
51 Center, Sendai, JAPAN, <sup>4</sup> Takagi Clinic, Sendai, JAPAN, <sup>5</sup> Osaki Citizen Hospital, Osaki,

52  
53  
54 JAPAN, <sup>6</sup> Sendai City Hospital, Sendai, JAPAN, <sup>7</sup> Japanese Red Cross Sendai Hospital, Sendai,

55  
56  
57 JAPAN, <sup>8</sup> Miyagi Cancer Center, Natori, JAPAN, <sup>9</sup> Iwate Prefectural Isawa Hospital, Oshu,

JAPAN, <sup>10</sup> Iwate Prefectural Chubu Hospital, Kitakami, JAPAN, <sup>11</sup> South Miyagi Medical Center, Ogawara, JAPAN, <sup>12</sup> Iwate Prefectural Iwai Hospital, Ichinoseki, JAPAN, <sup>13</sup> Kesenuma City Hospital, Kesenuma, JAPAN

Hisashi Shiga and Teruko Miyazawa contributed equally to this work.

Word count: 2,634 words (Abstract 296 words, Total 2,930 words)

Source of support: This study was not supported by grants from governmental agencies, private sources, or manufacturers of drugs or equipment.

Corresponding author

Hisashi Shiga

Division of Gastroenterology, Tohoku University Graduate School of Medicine,

1-1 Seiryō, Aoba, Sendai, 980-8574, Japan

Tel: +81 227177171, Fax: +81 227177177

*E-mail address:* [shiga@med.tohoku.ac.jp](mailto:shiga@med.tohoku.ac.jp)



**Abstract**

Objective: Stress is thought to be one of the triggers of relapses in patients with inflammatory bowel disease (IBD). We examined the rate of relapse in IBD patients before and after the Great East Japan Earthquake.

Design: A retrospective cohort study.

Settings: 13 hospitals in Japan.

Participants: 546 ulcerative colitis (UC) and 357 Crohn's disease (CD) patients who received outpatient and inpatient care at 13 hospitals located in the area that were seriously damaged by the earthquake. Data on patient's clinical characteristics, disease activity and deleterious effects of the earthquake were obtained from questionnaires and hospital records.

Primary outcome: We evaluated the relapse rate (from inactive to active) across two consecutive months before and two consecutive months after the earthquake, respectively. In this study, we defined "active" as conditions with a partial Mayo score = 2 or more (UC) or a Harvey-Bradshaw index = 6 or more (CD).

Results: Among the UC patients, disease was active in 167 patients and inactive in 379 patients before the earthquake. After the earthquake, the activity scores significantly increased ( $P < 0.0001$ ). A total of 86 patients relapsed (relapse rate = 15.8 %). The relapse rate was about twice that of the corresponding period in the previous year. Among the CD patients, 86 patients had

1  
2  
3  
4  
5  
6 active disease and 271 had inactive disease before the earthquake. After the earthquake, the

7  
8  
9 activity indices changed little. A total of 25 patients experienced relapse (relapse rate = 7.0 %).

10  
11  
12 The relapse rate did not differ from that of the corresponding period in the previous year.

13  
14  
15 Multivariate analyses revealed that UC, changes in dietary oral intake and anxiety about family

16  
17  
18 finances were associated with the relapse.

19  
20  
21 Conclusion: Life-event stress induced by the Great East Japan Earthquake was associated with

22  
23  
24 relapse in UC but not CD.

25  
26  
27 (296 words)

28  
29  
30  
31  
32 **Keywords**

33  
34  
35 earthquake, ulcerative colitis, Crohn's disease, relapse

## Article summary

### Article focus

Stress is thought to be one of the triggers of relapses in patients with inflammatory bowel disease (IBD); however, it would be unethical to impose stressful circumstances on IBD patients in order to examine their effects.

Disease onset or aggravation of cardiovascular disease, respiratory disease, peptic ulcer, etc. was reported to increase after the huge earthquake; however, there has been no report about relapses of IBD associated with the huge earthquake.

### Key messages

We examined the rate of relapse in IBD patients before and after a huge earthquake, the Great East Japan Earthquake of 11 March 2011 in Japan.

Life-event stress induced by the earthquake was associated with relapse of ulcerative colitis (UC) but not Crohn's disease.

This report suggests that we should take into account stress in the management of patients with IBD, especially those with UC.

### Strengths and limitations of this study

This is the first report that investigated the activities of a large number of IBD patients before and after a huge earthquake.

1  
2  
3  
4  
5  
6 We did not use validated scores that would objectively assess psychological stress, because it  
7  
8  
9 would be impossible to investigate stress several times before and after a devastating earthquake,  
10  
11  
12 given the usually unpredictable nature of earthquakes.

13  
14  
15 Our study cannot exclude recall bias.  
16  
17  
18  
19  
20  
21  
22  
23  
24  
25  
26  
27  
28  
29  
30  
31  
32  
33  
34  
35  
36  
37  
38  
39  
40  
41  
42  
43  
44  
45  
46  
47  
48  
49  
50  
51  
52  
53  
54  
55  
56  
57  
58  
59  
60

## Introduction

Inflammatory bowel disease (IBD) is a chronic remitting/relapsing disease. Although no variable has been proven to be a trigger of relapses in patients with IBD, stress has been described as one possibility.<sup>1 2 3 4 5 6 7 8</sup> On the other hand, some reports did not prove a relationship between psychological stress and exacerbations of IBD.<sup>9 10 11</sup> A prospective or well-established case-controlled study should be undertaken to determine whether stress is actually related to relapses of IBD; however, it would be unethical to impose stressful circumstances on IBD patients in order to examine their effects.

On 11 March 2011, Japan was hit by one of the most powerful earthquakes in recorded history, the Great East Japan Earthquake. The disaster left more than 28,000 people dead or missing, caused great damage or hardship in daily life, and also caused profound stress for all of the people, even those who did not suffer individual losses. It was surely one of the most stressful life events and might have contributed to relapses in IBD patients. In terms of earthquake-associated disease onset or aggravation, cardiovascular disease, respiratory disease, diabetes mellitus, hypertension and peptic ulcer were reported to increase after the huge earthquake.<sup>12 13 14 15 16 17</sup> However, there has been no report about relapses of IBD caused by the huge earthquake.

In this study, we examined the activities of IBD patients and their relapse and remission rates

1  
2  
3  
4  
5  
6  
7  
8  
9  
10  
11  
12  
13  
14  
15  
16  
17  
18  
19  
20  
21  
22  
23  
24  
25  
26  
27  
28  
29  
30  
31  
32  
33  
34  
35  
36  
37  
38  
39  
40  
41  
42  
43  
44  
45  
46  
47  
48  
49  
50  
51  
52  
53  
54  
55  
56  
57  
58  
59  
60

before and after the Great East Japan Earthquake. We also aimed to identify factors that were related to relapse or remission of IBD.

For peer review only

## Materials and methods

### Study subjects

Thirteen hospitals (Tohoku University Hospital, Japanese Red Cross Ishinomaki Hospital, Sendai Medical Center, Takagi Clinic, Osaki Citizen Hospital, Sendai City Hospital, Japanese Red Cross Sendai Hospital, Miyagi Cancer Center, South Miyagi Medical Center and Kesenuma City Hospital in Miyagi Prefecture; Iwate Prefectural Isawa Hospital, Iwate Prefectural Chubu Hospital, Iwate Prefectural Iwai Hospital in Iwate Prefecture) participated in this study. These hospitals are located in the area that was seriously damaged by the Great East Japan Earthquake. We sent a total of 1,080 questionnaires to ulcerative colitis (UC) and Crohn's disease (CD) patients who received care in these hospitals. Then we examined the hospital records for data on the patients who returned the questionnaires. Hospital data contained information such as gender, age, IBD duration, disease extent (total colitis, left-sided colitis and proctitis in UC), disease location (small intestine, colon and both in CD), extra-intestinal complications, use of medications, smoking status, and pregnancy experience. Written informed consent was obtained from all participants under the protocol approved by the Tohoku University Hospital Committee for Clinical Investigation.

To evaluate the degree of stress objectively, we also obtained data about each patient's situation regarding the earthquake, such as damage to the patient's house, duration of

1  
2  
3  
4  
5  
6 homelessness, deaths of family member or friends, changes in daily dietary intake,  
7  
8  
9 discontinuation or delay in taking medications, loss of job, family finances and changes in  
10  
11  
12 smoking status. We divided housing damage into 4 groups according to the degree of damage to  
13  
14 the house; total loss ( $\geq 50\%$ ), half-loss ( $\geq 20\%$  but  $< 50\%$ ), partial loss ( $\geq 3\%$  but  $< 20\%$ ) and no  
15  
16  
17 damage.  
18

19  
20 We evaluated the disease activity for two consecutive months before and two consecutive  
21  
22 months after the Great East Japan Earthquake using the Mayo score for UC <sup>18</sup> or  
23  
24 Harvey-Bradshaw index for CD <sup>19</sup>, depending on which was available in the hospital records  
25  
26 and questionnaires. The Mayo score is comprised of information on stool frequency, rectal  
27  
28  
29 bleeding, findings on endoscopy and a physician's global assessment. Scores can range from 0  
30  
31  
32 to 12. However, we used an abridged Mayo score (range from 0 to 9) that excluded findings on  
33  
34  
35 endoscopy because routine endoscopic examinations were not performed so soon after the  
36  
37  
38 earthquake. The Harvey-Bradshaw index is comprised of information on general condition,  
39  
40  
41 abdominal pain, diarrhea frequency, abdominal mass and complications. Higher scores for both  
42  
43  
44 the Mayo score and the Harvey-Bradshaw index indicate more severe disease activity. IBD  
45  
46  
47 patients having a stoma were excluded because of difficulties in counting bowel movements.  
48  
49

50  
51  
52 In this study, "active" was defined as follows: a partial Mayo score = 2 or more (UC) and a  
53  
54  
55 Harvey-Bradshaw index = 6 or more (CD). Lower scores indicated inactive disease. We defined  
56  
57



1  
2  
3  
4  
5  
6 “relapse” as a change from inactive to active and “remission” as a change from active to  
7  
8  
9 inactive across the 2-months before and 2-months after the earthquake. The patients who  
10  
11 remained active or inactive during the study period were considered to have “stable disease”.  
12  
13  
14 We compared the relapse and remission rates with those during the corresponding period in the  
15  
16 previous year as controls.  
17  
18  
19  
20  
21  
22

### 23 **Statistical analysis**

24  
25 Quantitative data are presented as mean  $\pm$  standard deviation (SD). Discrete variables are  
26  
27 presented as median and range. All statistical analyses were performed using the JMP version 9  
28  
29 (SAS Institute Inc., Cary, NC, USA). Differences between two groups were evaluated using  
30  
31 chi-square test or Fisher’s exact probability test, unpaired t-test or Wilcoxon signed-rank test, as  
32  
33 appropriate. A multiple logistic regression method that included all possible variables was used.  
34  
35  
36  
37  
38  
39  
40  
41 The level of statistical significance was set at  $P < 0.05$ .  
42  
43  
44  
45  
46  
47  
48  
49  
50  
51  
52  
53  
54  
55  
56  
57  
58  
59  
60

## Results

### Patients' clinical characteristics

A total of 903 completed questionnaires (from 546 UC and 357 CD) were returned to us. The response rate to the questionnaire was 83.6% (903/1080). We examined the hospital records for each patient. Of the UC patients, 269 (49.3%) were males and 277 (50.7%) were females. The mean age was  $45.3 \pm 16.6$  years and the mean disease duration was  $9.7 \pm 9.0$  years. The extent of disease was as follows: 208 patients (38.1%), total colitis (over splenic flexure); 183 (33.5%), left-sided colitis (up to splenic flexure); and 83 (15.2%), proctitis (up to rectum). The extent was unknown in 72 patients (13.2%). Among the CD patients, there were 253 males (70.9%) and 104 females (29.1%). The mean age was  $37.1 \pm 12.5$  years and the mean disease duration was  $11.6 \pm 8.1$  years. The location of disease was as follows: 61 patients (17.1%), small intestine; 47 (13.2%), colon; and 212 (59.4%), both small intestine and colon. The location was unknown in 37 patients (10.3%) (Table 1).

Fifty-one UC (9.3%) and 43 CD (12.0%) patients experienced extra-intestinal complications. Of the UC patients, 55 patients (10.1%) were current smokers and 162 (29.7%) were past smokers. On the other hand, 85 CD patients (23.8%) were current smokers, and 74 (20.7%) were past smokers. Of 277 females with UC, 181 (65.3%) had experienced pregnancy, while only 41 of 104 CD females (39.4%) had experienced pregnancy. Five UC patients and 3 CD

1  
2  
3  
4  
5  
6 patients were pregnant when the earthquake occurred (Table 1). Medications used by the IBD  
7  
8  
9 patients before the earthquake are shown in Table 2.

### 14 15 **Deleterious effects of the earthquake**

16  
17 Of the 903 IBD patients, the houses of 501 patients (55.5%) were damaged; partial loss was  
18  
19 experienced by 369 patients (40.9%), half-loss by 58 (6.4%), and total loss by 74 (8.2%). As a  
20  
21 result, 62 (6.9%) patients had to stay in refuge facilities for one week or more. A total of 175  
22  
23 patients (19.4%) experienced the death of a family member or a friend (Table 3).

24  
25  
26 Only 51 patients (5.7%) experienced complete loss of their jobs after the earthquake.  
27  
28 However, 279 (30.9%) and 157 (17.4%) patients reported short-term (for the next several  
29  
30 months) and long-term (for the next several years) anxiety about their family finances,  
31  
32 respectively (Table 3).

33  
34 Because of temporary homelessness and difficulty in obtaining various types of food, changes  
35  
36 in daily intake such as fat, vegetables, fruits, etc. were experienced by 269 patients (29.8%) after  
37  
38 the earthquake. With regard to medications, 69 patients (11.7%) interrupted medications for a  
39  
40 week or more because they had lost their medicines or could not consult with doctors (see Table  
41  
42  
43  
44  
45  
46  
47  
48  
49  
50  
51  
52  
53  
54  
55  
56  
57  
58  
59  
60 3).

### Changes in disease activity before and after the earthquake

Of the UC patients, disease was active in 167 patients (30.6%) and inactive in 379 patients (69.4%) before the earthquake. After the earthquake, the activity scores significantly increased ( $P < 0.0001$ ). A total of 86 patients relapsed and the disease status became inactive in 22 patients; therefore, the relapse rate (from inactive to active) was 15.8% (86/546) and the remission rate (from active to inactive) was 4.0% (22/546). The relapse rate was significantly higher than in the previous year (8.8%, data not shown). On the other hand, the remission rate was significantly lower than in the previous year (8.8%, data not shown).

Of the CD patients, 86 patients (24.1%) had active disease and 271 patients (75.9%) had inactive disease before the earthquake. After the earthquake, the activity indices were little changed. A total of 25 patients relapsed and the disease status became inactive in 16 patients; therefore, the relapse rate (from inactive to active) was 7.0% (25/357) and the remission rate (from active to inactive) was 4.5% (16/357). Unlike UC, the relapse rate among CD patients was slightly higher than in the previous year (5.3%, data not shown), but not significantly. On the other hand, the remission rate was twice that of the previous year (2.2%, data not shown), but did not differ significantly.

Because of relapses, 96 patients (10.6%) required additional medication after the earthquake as follows: prednisolone (27 patients), tacrolimus (3), azathioprine (11), infliximab (13),

1  
2  
3  
4  
5  
6 adalimumab (6), total parenteral nutrition (4), or others.  
7  
8  
9

### 10 11 12 **Possible variables for relapse or remission** 13

14  
15 There were no differences in the patients' clinical characteristics between the relapse group  
16  
17 and non-relapse group. With regard to remission, there were also no differences in the patients'  
18  
19 clinical characteristics between the remission group and non-remission group.  
20  
21

22  
23 Multivariate analyses revealed that UC, changes in oral intake and anxiety about family  
24  
25 finances were independent predictors of relapse with an adjusted odds ratio (OR) of 2.86 (95%  
26  
27 confidence interval (CI), 1.73 to 4.87), 1.83 (1.16 to 2.88) and 1.69 (1.05 to 2.70), respectively  
28  
29  
30  
31 (Table 4). On the other hand, no factor was identified as an independent predictor of remission  
32  
33  
34  
35 (Table 5).  
36  
37  
38  
39  
40  
41  
42  
43  
44  
45  
46  
47  
48  
49  
50  
51  
52  
53  
54  
55  
56  
57  
58  
59  
60

## Discussion

Of the 903 IBD patients, 132 patients (14.6%) had experienced damage to their homes of half or more and 175 patients (19.4%) experienced the death of a family member or friend. These factors would suggest that the Great East Japan Earthquake was likely one of the most stressful life events for those affected. The response rate to the questionnaire (83.6%) was satisfactory. However, the damage caused by the earthquake might have been more serious, because the non-response group might have included patients who took refuge somewhere or died. The present study showed that life-event stress induced by the Great East Japan Earthquake was associated with relapse of UC but not CD. This is the first report that investigated the activities of a large number of IBD patients before and after a huge earthquake.

As for the patient's clinical characteristics, gender, age, IBD duration, extra-intestinal complications and smoking status did not influence the incidence of relapses, with the exception of IBD type (UC or CD). As mentioned above, there have been many reports that psychological stress may induce flares of UC.<sup>1 2 3 4 5 6 8</sup> On the other hand, there have been few reports about relapses of CD.<sup>4 7 8</sup> Our present study demonstrated that psychological stress was associated with relapse in UC but not CD. In terms of damage and other deleterious effects from the earthquake, damage to houses, duration of temporary homelessness, death of family members or friends and unemployment were not associated with relapses of IBD; however, anxiety about

1  
2  
3  
4  
5  
6 family finances was related to relapse. These results may suggest that psychological stress or  
7  
8  
9 uneasiness about the future has a greater effect on UC relapses than direct damage and losses.  
10

11  
12 Although the discontinuation of medication had no influence on relapses of IBD, changes in  
13  
14 daily dietary intake **did. A relationship** between dietary factors and the onset or relapses of IBD  
15  
16 has been reported.<sup>20 21 22</sup> After the earthquake, many patients could not obtain enough fresh  
17  
18 food; therefore, they consumed more processed foods and fewer fresh vegetables and fruits.  
19  
20  
21

22  
23 With regard to possible variables **related to** remission, we expected that a decrease in the total  
24  
25 volume or in fatty foods would **be associated with** remission, especially in CD patients.  
26  
27

28  
29 However, our results did not **support** this hypothesis. **This may have been because** the period of  
30  
31 dietary restriction was not so long. There were few patients that **changed their** smoking status  
32  
33 after the earthquake; therefore, we could not include this factor in multivariate analyses.  
34  
35  
36

37  
38 However, changes in smoking status may have been an important factor in relapses of UC, but  
39  
40 not CD. Of the 9 UC patients who stopped smoking after the earthquake, 7 experienced relapses  
41  
42 ( $P = 0.002$ ). Beaugerie et al. reported that among smokers with UC who stopped smoking, the  
43  
44 disease severity increased after cessation.<sup>23</sup> Over the short term, smoking itself did not **appear**  
45  
46  
47 **to influence** relapse or remission; however, changes in smoking status **were associated with**  
48  
49  
50 relapse in UC.  
51  
52  
53

54  
55 Our study had some limitations. First, we did not use validated scores that could objectively  
56  
57

1  
2  
3  
4  
5  
6 assess psychological stress such as the Cohen Perceived Stress Scale.<sup>24</sup> Since huge earthquakes  
7  
8 usually happen without warning, it is impossible to investigate stress several times before and  
9  
10 after an earthquake. Therefore, we assessed the degree of stress by examining information about  
11  
12 damage and changes in life style after the Great East Japan Earthquake. Second, our study  
13  
14 cannot exclude recall bias. It was difficult to administer a questionnaire immediately after the  
15  
16 earthquake, which is why we obtained data about clinical characteristics and activities from both  
17  
18 questionnaires and medical records. Third, non-steroidal anti-inflammatory drugs (NSAIDs) and  
19  
20 antibiotics may contribute to relapses of IBD.<sup>25</sup> However, we think the numbers of newly  
21  
22 prescribed NSAIDs and antibiotics during the study period were less than or equal to those of  
23  
24 the corresponding period in the previous year. Because of the difficulty in obtaining medicine  
25  
26 after an earthquake, the numbers of newly prescribed NSAIDs and antibiotics might have  
27  
28 decreased. In addition, unlike in the case of UC patients, twice as many males as females were  
29  
30 CD patients, which is in agreement with previous reports in Japan.<sup>26 27 28</sup> More CD patients  
31  
32 were current smokers than those with UC, in agreement with previous reports.<sup>8 20</sup>  
33  
34  
35  
36  
37  
38  
39  
40  
41  
42  
43  
44  
45

46 Life-event stress induced by the Great East Japan Earthquake was related to relapses in UC  
47  
48 but not CD. We hope that this report will be useful to the management of patients with IBD, not  
49  
50 only during catastrophic events but also generally. For the future, a prospective study should be  
51  
52 undertaken to determine whether stress is actually related to relapses of IBD.  
53  
54  
55  
56  
57  
58  
59  
60



### Contributorship statement

Hisashi Shiga and Teruko Miyazawa had the original idea for this study and were involved in writing the original study protocol, data collection and writing manuscript.

Gen Tominaga, Hiroki Takahashi, Sho Takagi, Nobuya Obana, Tatsuya Kikuchi, Shinya

Oomori, Eiki Nomura, Manabu Shiraki, Yuichirou Sato, Shuichiro Takahashi, Ken Umemura,

Hiroshi Yokoyama, Katsuya Endo, Yoichi Kakuta, Hiroki Aizawa, Masaki Matsuura, Tomoya

Kimura and Masatake Kuroha were involved in data collection and contributed to discussions.

Yoshitaka Kinouchi, Seiichi Takahashi and Tooru Shimosegawa contributed to discussions and reviewed the manuscript.

All authors had full access to all of the data in this study and can take responsibility for the integrity of the data and the accuracy of the data analysis.

### Funding

This study was not supported by grants from governmental agencies, private sources, or manufacturers of drugs or equipment. This study was performed within the health insurance treatment.

### Declaration of interest

All authors have completed the Unified Competing Interest form at

1  
2  
3  
4  
5  
6 [www.icmje.org/coi\\_disclosure.pdf](http://www.icmje.org/coi_disclosure.pdf) (available on request from the corresponding author) and  
7  
8  
9 declare that (1) there was no support from any organisations for the submitted work; (2) no  
10  
11 financial relationships with any organisations that might have an interest in the submitted work  
12  
13 in the previous 3 years; (3) no other relationships or activities that could appear to have  
14  
15 influenced the submitted work.  
16  
17  
18  
19

### 20 **Ethical approval**

21  
22  
23 This study was approved by the Tohoku University Hospital Committee for Clinical  
24  
25 Investigation. Data are presented in aggregate and no personal health information is disclosed.  
26  
27  
28

### 29 **Data sharing**

30  
31  
32 No additional data available.  
33  
34  
35  
36  
37  
38  
39  
40  
41  
42  
43  
44  
45  
46  
47  
48  
49  
50  
51  
52  
53  
54  
55  
56  
57  
58  
59  
60

## References

1. Mawdsley JE, Rampton DS. Psychological stress in IBD: new insights into pathogenic and therapeutic implications. *Gut* 2005; 54: 1481–91.
2. Levenstein S, Prantera C, Varvo V, et al. Stress and exacerbation in ulcerative colitis: A prospective study of patients enrolled in remission. *Am J Gastroenterol* 2000; 95: 1213–20.
3. Bitton A, Sewitch MJ, Peppercorn MA, et al. Psychosocial determinants of relapse in ulcerative colitis: a longitudinal study. *Am J Gastroenterol* 2003; 98: 2203–8.
4. Mittermaier C, Dejaco C, Waldhoer T, et al. Impact of depressive mood on relapse in patients with inflammatory bowel disease: a prospective 18-month follow-up study. *Psychosom Med* 2004; 66: 79-84.
5. Mawdsley JE, Macey MG, Feakins RM, et al. The effect of acute psychologic stress on systemic and rectal mucosal measures of inflammation in ulcerative colitis. *Gastroenterology* 2006; 131: 410-9.
6. Maunder RG, Greenberg GR, Nolan RP, et al. Autonomic response to standardized stress predicts subsequent disease activity in ulcerative colitis. *Eur J Gastroenterol Hepatol* 2006; 18: 413–420.
7. Bitton A, Dobkin P, Edwardes MD, et al. Predicting relapse in Crohn’s disease: a biopsychosocial model. *Gut* 2008; 57: 1386–92.

- 1  
2  
3  
4  
5  
6 8. Bernstein CN, Singh S, Graff LA, et al. A prospective population-based study of triggers of  
7  
8  
9 symptomatic flares in IBD. *Am J Gastroenterol* 2010; 105: 1994–2002.  
10  
11  
12 9. North CS, Alpers DH, Helzer JE, et al. Do life events or depression exacerbate  
13  
14 inflammatory bowel disease? A prospective study. *Ann Intern Med* 1991; 114: 381–386.  
15  
16  
17 10. Vidal A, Gomez-Gil E, Sans M, et al. Life events and inflammatory bowel disease relapse:  
18  
19 a prospective study of patients enrolled in remission. *Am J Gastroenterol* 2006; 101:  
20  
21 775–781.  
22  
23  
24  
25  
26 11. Mikocka-Walus AA, Turnbull DA, Moulding NT, et al. Does psychological status  
27  
28 influence clinical outcomes in patients with inflammatory bowel disease (IBD) and other  
29  
30 chronic gastroenterological diseases: an observational cohort prospective study.  
31  
32  
33 *Biopsychosoc Med* 2008; 2: 11-19.  
34  
35  
36  
37  
38 12. Takakura R, Himeno S, Kanayama Y, et al. Follow-up after the Hanshin-Awaji earthquake:  
39  
40 diverse influences on pneumonia, bronchial asthma, peptic ulcer and diabetes mellitus.  
41  
42  
43 *Intern Med* 1997; 36: 87-91.  
44  
45  
46  
47 13. Matsuoka T, Yoshioka T, Oda J, et al. The impact of a catastrophic earthquake on  
48  
49 morbidity rates for various illnesses. *Public Health* 2000; 114: 249-53.  
50  
51  
52  
53 14. Aoyama N, Kinoshita Y, Fujimoto S, et al. Peptic ulcers after the Hanshin-Awaji  
54  
55 earthquake: increased incidence of bleeding gastric ulcers. *Am J Gastroenterol* 1998; 93:  
56  
57  
58  
59  
60

- 1  
2  
3  
4  
5  
6 311-6.  
7  
8  
9 15. Aoki T, Fukumoto Y, Yasuda S, et al. The Great East Japan Earthquake Disaster and  
10  
11 cardiovascular diseases. *Eur Heart J* 2012 Aug 28 [Epub ahead of print].  
12  
13  
14 16. Ogawa S, Ishiki M, Nako K, et al. Effects of the Great East Japan Earthquake and huge  
15  
16 tsunami on glycaemic control and blood pressure in patients with diabetes mellitus. *BMJ*  
17  
18 *Open* 2012; 2: e000830.  
19  
20  
21  
22  
23 17. Aoyagi T, Yamada M, Kunishima H, et al. Characteristics of infectious diseases in  
24  
25 hospitalized patients during the early phase after the 2011 Great East Japan earthquake:  
26  
27 pneumonia as a significant reason for hospital care. *Chest* 2012 Aug 13 [Epub ahead of  
28  
29 print].  
30  
31  
32  
33  
34 18. Schroeder KW, Tremaine WJ, Ilstrup DM. Coated oral 5-aminosalicylic acid therapy for  
35  
36 mildly to moderately active ulcerative colitis. A randomized study. *N Engl J Med* 1987;  
37  
38 317: 1625-9.  
39  
40  
41  
42  
43 19. Harvey RF, Bradshaw JM. A simple index of Crohn's-disease activity. *Lancet* 1980; 1:  
44  
45 514.  
46  
47  
48  
49 20. Thornton JR, Emmett PM, Heaton KW. Smoking, sugar, and inflammatory bowel disease.  
50  
51 *Br Med J*. 1985; 290: 1786-7.  
52  
53  
54  
55 21. Jowett SL, Seal CJ, Pearce MS, et al. Influence of dietary factors on the clinical course of  
56  
57  
58  
59  
60

- 1  
2  
3  
4  
5  
6 ulcerative colitis: a prospective cohort study. *Gut* 2004; 53: 1479-84.  
7  
8  
9 22. Jantchou P, Morois S, Clavel-Chapelon F, et al. Animal protein intake and risk of  
10  
11 inflammatory bowel disease: The E3N prospective study. *Am J Gastroenterol* 2010; 105:  
12  
13 2195-201.  
14  
15  
16  
17 23. Beaugerie L, Massot N, Carbonnel F, et al. Impact of cessation of smoking on the course of  
18  
19 ulcerative colitis. *Am J Gastroenterol*. 2001; 96: 2113-6.  
20  
21  
22  
23 24. Cohen S, Kamarck T, Mermelstein R. A global measure of perceived stress. *J Health Soc*  
24  
25  
26  
27 Behav 1983; 24: 385-96.  
28  
29 25. Singh S, Graff LA, Bernstein CN. Do NSAIDs, antibiotics, infections, or stress trigger  
30  
31  
32  
33 flares in IBD? *Am J Gastroenterol* 2009; 104: 1298-313.  
34  
35 26. Yao T, Matsui T, Hiwatashi N. Crohn's disease in Japan: diagnostic criteria and  
36  
37  
38  
39 epidemiology. *Dis Colon Rectum* 2000; 43: S85-93  
40  
41 27. Asakura K, Nishiwaki Y, Inoue N, et al. Prevalence of ulcerative colitis and Crohn's  
42  
43  
44  
45 disease in Japan. *J Gastroenterol* 2009; 44: 659-65.  
46  
47 28. Ishige T, Tomomasa T, Takebayashi T et al. Inflammatory bowel disease in children:  
48  
49  
50  
51  
52  
53  
54  
55  
56  
57  
58  
59  
60 epidemiological analysis of the nationwide IBD registry in Japan. *J Gastroenterol* 2010; 45:  
911-7.
